# Supplementary material for: Facile synthesis of chiral 2-functionalized tetrahydroquinolines via Pd/Cu-catalyzed cascade γ-C(sp3)–H arylation/C–N coupling of amides derived from amino acids and their derivatives
Source: Royal Society of Chemistry journal article supplement (doi:10.1039/d3qo00884c), 2023-01-01
Supplement: d3qo00884c1.pdf [file d3qo00884c1.pdf]

## SUPPORTING INFORMATION

For

Facile Synthesis of Chiral 2-functionalized Tetrahydroquinolines via Pd/Cu-catalyzed Cascade  $\gamma$ -C(sp<sup>3</sup>)-H Arylation/C-N Coupling of Amides Derived from Amino Acids and Their Derivatives

Dian Yu,<sup>a, #</sup> Si-Yuan Peng,<sup>b, #</sup> Han Wang,<sup>a, #</sup> Qiu-Cui Zheng,<sup>a</sup> Ya-Hui Ma,<sup>a</sup> Dong-Yi Xiao,<sup>a</sup> Qian-Li Li,<sup>c</sup> Wen-Shu Wang,<sup>a</sup> Xiao-Jie Cui,<sup>a</sup> Fei-Xian Luo<sup>a,\*</sup>

<sup>a</sup>. Key Laboratory of Ecology and Environment in Minority Areas (Minzu University of China), National Ethnic Affairs Commission, Beijing, 100081, College of Life and Environmental Sciences, Minzu University of China, and Center for Bioimaging & System Biology, Minzu University of China, Beijing, 100081, China. Email: luofeixian@muc.edu.cn

<sup>b</sup>. Department of Chemistry, Capital Normal University, Beijing, 100048, China.

<sup>c</sup>. School of Chemistry and Chemical Engineering, Liaocheng University, Liaocheng, Shandong, 252000, China

<sup>‡</sup>D. Yu, S.-Y. Peng, and H. Wang contributed equally to this work

Email: luofeixian@muc.edu.cn

| <b>Content</b>                                                           |     |
|--------------------------------------------------------------------------|-----|
| I General consideration                                                  | P2  |
| II Substrate amides in this manuscript                                   | P2  |
| III General procedure for the synthesis of substrate amides              | P3  |
| IV Characterization data for substrates                                  | P4  |
| V Standard procedure for Pd-catalyzed C-H Arylation / C-N Coupling       | P10 |
| VI Gram-scale synthesis of <b>3a</b> and removal of the protecting group | P10 |
| VII Characterization data for products                                   | P11 |
| VIII ee value of selected starting materials and products                | P23 |
| IX NMR spectra                                                           | P24 |
| X HPLC spectra                                                           | P76 |

## I General consideration

### General experimental section

$^1\text{H}$  NMR,  $^{13}\text{C}$  NMR data, and  $^{19}\text{F}$  NMR spectra were obtained on Bruker 600 M nuclear resonance spectrometers unless otherwise specified, respectively.  $\text{CDCl}_3$  was employed as the solvent and tetramethyl silane (TMS) as the internal standard. Chemical shifts were reported in units (ppm) by assigning TMS resonance in the  $^1\text{H}$  NMR spectrum as 0.00 ppm. The data of  $^1\text{H}$  NMR was reported as follows: chemical shift, multiplicity (s = singlet, d = doublet, t = triplet, m = multiple, dq = double quadruplet, dt = double triplet, and br = broad), coupling constant ( $J$  values) in Hz and integration. Chemical shifts for  $^{13}\text{C}$  NMR spectra were recorded in ppm from TMS using the central peak of  $\text{CDCl}_3$  (77.2 ppm) as the internal standard. According to standard techniques, flash chromatography was performed using 200-300 mesh silica gels with the indicated solvent system. Analytical thin-layer chromatography (TLC) was performed on pre-coated, glass-backed silica gel plates. Visualization of the developed chromatogram was performed by UV absorbance (254 nm). Optical rotations were measured by polarimeter. HRMS (ESI) analysis was performed by Analytical Instrumentation Center, Peking University. The analytical data for the known compounds were found to match the literature data.

### General preparation for chemicals

The ortho halogen substituted phenyl iodides were all purchased from Ark. The metal catalyst  $\text{Pd}(\text{OAc})_2$ ,  $\text{Ag}_2\text{CO}_3$ ,  $\text{Cs}_2\text{CO}_3$ , amino acids and amino alcohols were purchased from Energy-Chemical Co. Ltd.  $\text{CuI}$  was purchased from Sinopharm Chemical Reagent Co. Ltd. *t*-Amyl OH was purchased from Alfa Aesar Co. Ltd and used directly without further purification. Toluene and other related solvents were purchased from Tongguang Chemical Reagent Co. Ltd and used directly without further purification.

## II Substrate amides in this manuscript

Table S1 Substrate Amides

|                                                                                             |                                                                                             |                                                                                            |                                                                                               |
|---------------------------------------------------------------------------------------------|---------------------------------------------------------------------------------------------|--------------------------------------------------------------------------------------------|-----------------------------------------------------------------------------------------------|
| 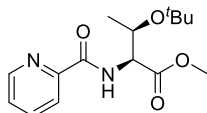<br>1a   | <br>1a-R | <br>1b | <br>1c-S |
| <br>1c-R | <br>1d   | <br>1e | <br>1f   |
| <br>1g   | <br>1h   | <br>1i | <br>1j   |
| <br>1j-S | <br>1k   | <br>1l | <br>1m   |

## III General procedure for the synthesis of substrate amides

### 3-1 General procedure for the synthesis of amides **1a-1f**, **1l**, and **1m**

#### Scheme S1 General procedure for the synthesis of amides **1a-1f**, **1l**, and **1m**

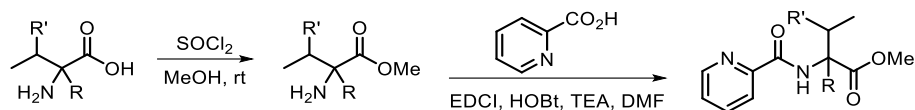

According to the literature procedures.<sup>1</sup>

Step1: To a solution of the amino acids (20 mmol) in MeOH (30 mL) in ice water bath was slowly added SOCl<sub>2</sub> (20 mmol), and then two drops of DMF were added. The resulting mixture was stirred in oil bath at 50 °C with a condenser for 4 h. After the reaction, the mixture was evaporated under vacuum, dissolved in CH<sub>2</sub>Cl<sub>2</sub>, and further evaporated under vacuum to give crude amino acid esters without further purification.

Step2: To a solution of the amino acid esters in DMF (0.3 M) was sequentially added picolinic acid (1 equiv), EDCI (1equiv), triethylamine (2 equiv), HOBT (1 equiv) at rt. The reaction mixture was stirred for 12 h under the same conditions. Upon completion, the mixture was quenched with water and diluted with EA. The organic layer was removed and the aqueous layer was extracted with EA. The combined organic layers were washed with brine. The organic layer was dried with Na<sub>2</sub>SO<sub>4</sub>, filtered, and concentrated by rotary evaporation. The residue thus obtained was purified by silica gel column chromatography (PE/EtOAc) to afford the pure amide.

### 3-2 General procedure for the synthesis of amides **1g-1k**

According to the literature procedures with slight modification.<sup>2</sup>

#### Scheme S2 General procedure for the reduction of amides **1a** and **1d**

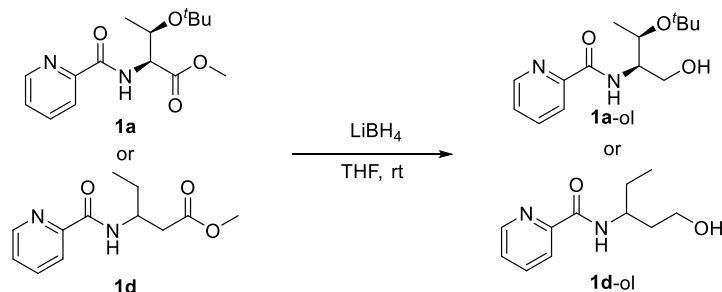

Step 1, reduction step: The solution of picolinamides **1a** or **1d**, ( 1 equiv) in THF (20 mL) under an argon atmosphere was cooled in water/ice bath to 0 °C and lithium borohydride (4 M in THF, 1.3 equiv.) was added slowly dropwise, then the reaction mixture was stirred at room temperature for 3 h. The reaction was monitored by TLC to achieve full conversion, then cooled in water/ice bath and quenched by 15% citric acid solution in water. The organic solvent was evaporated in vacuum and water phase was extracted by DCM (2 × 30 mL). The combined organic phase was dried over Na<sub>2</sub>SO<sub>4</sub>, filtered and evaporated under reduced pressure to afford the crude product, which was used in next step without further purification.

#### Scheme S3 General procedure of the silylation of amino alcohols for **1i**, **1j**, and **1j-s**

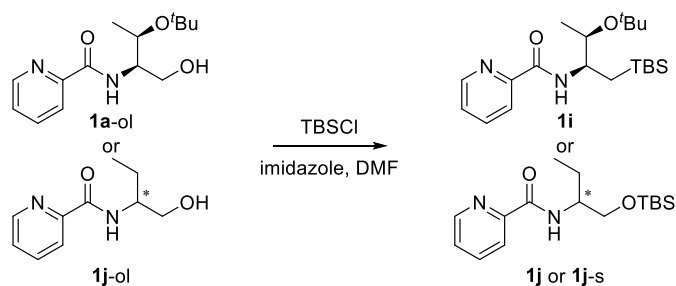

Step 2, alcohol protection with silyl reagent. alcohols **1a-ol** or **1j-ol** in DMF (5 mL) was added with imidazole (1.3 equiv) and tertbutyldimethylsilyl chloride (1.3 equiv). The reaction mixture was stirred at room temperature to achieve full conversion, the solution was diluted with EtOAc (30 mL) and H<sub>2</sub>O (20 mL). The organic phase was separated and the water phase was extracted with EtOAc (20 mL), the combined organic phase was washed with brine (20 mL) and further dried over Na<sub>2</sub>SO<sub>4</sub>, filtered and evaporated under reduced pressure to afford the crude product, which was further purified by flash chromatography on silica gel using petroleum ether/EtOAc (6/1) as an eluent to give the corresponding product as colorless oil.

#### Scheme S4 General procedure of esterification of amino alcohols for **1g**, **1h**, and **1k**

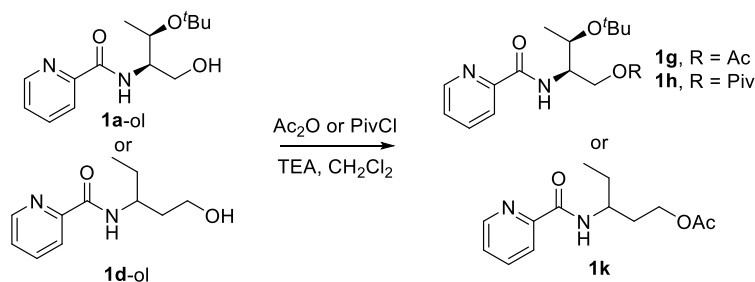

Step 3, esterification of alcohols step, alcohols **1a-ol** or **1d-ol** in CH<sub>2</sub>Cl<sub>2</sub> (20 mL) was added with Ac<sub>2</sub>O or PivCl (1.1 equiv) and TEA (1.2 equiv) and DMAP (0.1 equiv). The reaction mixture was stirred at room temperature to achieve full conversion, the solution was evaporated under vacuum and diluted with EtOAc (30 mL) and H<sub>2</sub>O (20 mL). The organic phase was separated and the water phase was extracted with EtOAc (20 mL), the combined organic phase was washed with brine (20 mL) and further dried over Na<sub>2</sub>SO<sub>4</sub>, filtered and evaporated under reduced pressure to afford the crude product, which was further purified by flash chromatography on silica gel using petroleum ether/EtOAc (3/1) as an eluent to give the corresponding product as a colourless oil.

#### IV Characterization data for substrates

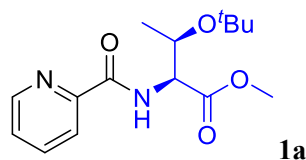

**methyl O-(tert-butyl)-N-picolinoyl-L-threoninate (1a)**, 4.4 g (20 mmol scale), 75%, White solid,  $R_f = 0.45$  (PE/EtOAc = 3/1),  $[\alpha]_D^{30} = 44.8$  (c 0.1, CHCl<sub>3</sub>), mp=126.8-128.0 °C.

<sup>1</sup>H NMR (600 MHz, Chloroform-*d*)  $\delta$  8.69 (d,  $J = 8.3$  Hz, 1H), 8.63 (s, 1H), 8.17 (d,  $J = 7.7$  Hz, 1H), 7.84 (t,  $J = 7.5$  Hz, 1H), 7.44 (s, 1H), 4.71 (d,  $J = 9.2$  Hz, 1H), 4.37 – 4.30 (m, 1H), 3.74 (s, 3H), 1.23 (d,  $J = 5.8$  Hz, 3H), 1.18 (s, 9H).

<sup>13</sup>C NMR (151 MHz, Chloroform-*d*)  $\delta$  171.4, 164.9, 149.7, 148.5, 137.3, 126.4, 122.5, 74.3, 67.8, 58.2, 52.4, 28.5, 21.1.

The data is in agreement with that reported in the literature<sup>1</sup>.

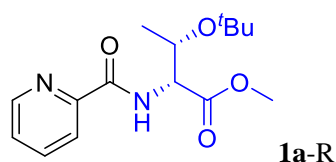

**methyl O-(tert-butyl)-N-picolinoyl-D-threoninate (1a-R)**, 2.4 g (10 mmol scale), 82%, White solid,  $R_f = 0.45$  (PE/EtOAc = 3/1),  $[\alpha]^{26}_D = -53.28$  (c 0.404, CHCl<sub>3</sub>), mp=131.5-132.4 °C.

<sup>1</sup>H NMR (600 MHz, Chloroform-*d*)  $\delta$  8.68 (d,  $J = 8.6$  Hz, 1H), 8.63 (d,  $J = 4.7$  Hz, 1H), 8.18 (d,  $J = 8.6$  Hz, 1H), 7.84 (t,  $J = 7.7$  Hz, 1H), 7.43 (d,  $J = 4.8$  Hz, 0H), 4.71 (dd,  $J = 9.3, 2.2$  Hz, 1H), 4.34 (qd,  $J = 6.3, 2.2$  Hz, 1H), 3.74 (s, 2H), 1.24 (d,  $J = 6.3$  Hz, 2H), 1.18 (s, 6H).

<sup>13</sup>C NMR (151 MHz, Chloroform-*d*)  $\delta$  171.4, 164.9, 149.8, 149.7, 148.54, 148.50, 137.4, 137.3, 126.4, 122.6, 74.3, 67.9, 58.3, 52.4, 28.5, 21.1.

The data is in agreement with that reported in the literature<sup>3</sup>.

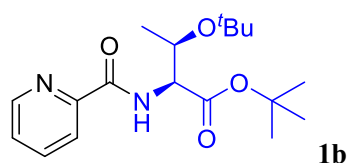

**tert-butyl O-(tert-butyl)-N-picolinoyl-L-threoninate (1b)**, 2.6 g (10 mmol scale), 78%, Colorless liquid,  $R_f = 0.45$  (PE/EA=3:1, v/v),  $[\alpha]^{29}_D = 50.5$  (c 0.2, CHCl<sub>3</sub>).

<sup>1</sup>H NMR (600 MHz, Chloroform-*d*)  $\delta$  8.66 (d,  $J = 7.9$  Hz, 1H), 8.61 (s, 1H), 8.17 (d,  $J = 7.4$  Hz, 1H), 7.84 (s, 1H), 7.42 (dt,  $J = 7.8, 3.7$  Hz, 1H), 4.59 (d,  $J = 9.1$  Hz, 1H), 4.29 (s, 1H), 1.47 (s, 9H), 1.22 (s, 9H).

<sup>13</sup>C NMR (151 MHz, Chloroform-*d*)  $\delta$  169.9, 164.7, 149.8, 148.5, 137.3, 137.3, 126.3, 122.4, 122.4, 82.0, 74.0, 67.7, 58.7, 28.8, 28.2, 20.9.

HRMS (ESI): found: 351.2289 ([M+H]<sup>+</sup>), calcd. Chemical Formula: C<sub>19</sub>H<sub>31</sub>N<sub>2</sub>O<sub>4</sub>, Exact Mass: 351.2284.

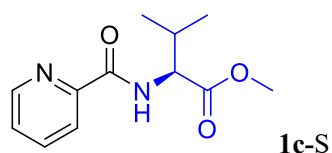

**methyl picolinoyl-L-valinate (1c-S)**, 3.3 g (20 mmol scale), 78%, Colorless liquid,  $R_f = 0.45$  (PE/EA=3:1, v/v),  $[\alpha]^{29}_D = 33.5$  (c 0.2, CHCl<sub>3</sub>).

<sup>1</sup>H NMR (600 MHz, Chloroform-*d*)  $\delta$  8.59 (s, 1H), 8.51 (d,  $J = 5.7$  Hz, 1H), 8.17 (d,  $J = 6.8$  Hz, 1H), 7.85 (d,  $J = 6.7$  Hz, 1H), 7.44 (s, 1H), 4.73 (s, 1H), 3.76 (s, 3H), 2.31 (s, 1H), 1.01 (s, 6H).

<sup>13</sup>C NMR (151 MHz, Chloroform-*d*)  $\delta$  172.4, 164.4, 149.6, 148.4, 137.4, 126.5, 122.5, 57.5, 52.3, 31.6, 19.3, 18.0.

The data is in agreement with that reported in the literature<sup>1</sup>.

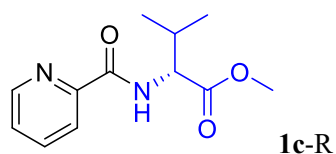

**methyl picolinoyl-L-valinate (1c-R)**, 3.3 g (20 mmol scale), 78%, Colorless liquid,  $R_f = 0.45$  (PE/EA=3:1, v/v),  $[\alpha]^{29}_D = -24.6$  (c 0.2, CHCl<sub>3</sub>).

$^1\text{H}$  NMR (600 MHz, Chloroform-*d*)  $\delta$  8.54 (s, 1H), 8.48 (d,  $J = 7.5$  Hz, 1H), 8.12 (d,  $J = 7.6$  Hz, 1H), 7.80 (t,  $J = 7.3$  Hz, 1H), 7.39 (s, 1H), 4.76 – 4.63 (m, 1H), 3.72 (s, 3H), 2.27 (dt,  $J = 10.4, 5.3$  Hz, 1H), 0.97 (s, 6H).

$^{13}\text{C}$  NMR (151 MHz, Chloroform-*d*)  $\delta$  172.2, 164.3, 149.4, 148.3, 137.4, 126.4, 122.3, 57.3, 52.2, 31.5, 19.2, 17.9.

The data is in agreement with that reported in the literature<sup>1</sup>.

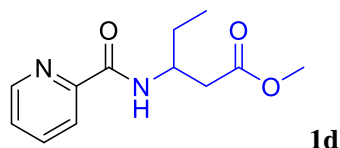

**methyl 3-(picolinamido)pentanoate**, 1.7 g (20 mmol scale), 72%, Colorless liquid,  $R_f = 0.51$  (PE/EA=3:1, v/v).

$^1\text{H}$  NMR (600 MHz, Chloroform-*d*)  $\delta$  8.47 (ddd,  $J = 4.8, 1.8, 0.9$  Hz, 1H), 8.29 (d,  $J = 9.3$  Hz, 1H), 8.09 (dt,  $J = 7.8, 1.1$  Hz, 1H), 7.74 (td,  $J = 7.7, 1.7$  Hz, 1H), 7.33 (ddd,  $J = 7.6, 4.8, 1.2$  Hz, 1H), 4.31 (ddt,  $J = 12.6, 9.3, 5.9$  Hz, 1H), 3.59 (s, 3H), 2.64 – 2.52 (m, 2H), 1.67 – 1.57 (m, 2H), 0.89 (t,  $J = 7.4$  Hz, 3H).

$^{13}\text{C}$  NMR (151 MHz, Chloroform-*d*)  $\delta$  171.9, 163.8, 149.8, 148.1, 137.2, 126.0, 122.1, 51.6, 47.7, 38.5, 27.3, 10.6.

The data is in agreement with that reported in the literature<sup>4</sup>.

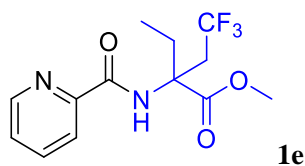

**ethyl 2-ethyl-4,4,4-trifluoro-2-(picolinamido)butanoate (1e)**, 1.9 g (20 mmol scale), 61%, white solid, mp=66.5-67.1 °C,  $R_f = 0.48$  (PE/EA=3:1, v/v).

$^1\text{H}$  NMR (600 MHz, Chloroform-*d*)  $\delta$  9.16 (s, 1H), 8.62 (s, 1H), 8.13 (d,  $J = 7.7$  Hz, 1H), 7.85 (t,  $J = 7.8$  Hz, 1H), 7.45 (p,  $J = 3.5$  Hz, 1H), 4.35 (tq,  $J = 7.8, 4.1, 3.7$  Hz, 2H), 3.68 (p,  $J = 11.1$  Hz, 1H), 2.90 – 2.79 (m, 1H), 2.70 (dq,  $J = 14.8, 7.6$  Hz, 1H), 1.88 (dq,  $J = 14.7, 7.4, 6.7$  Hz, 1H), 1.35 (t,  $J = 6.8$  Hz, 3H), 0.81 (t,  $J = 7.1$  Hz, 3H).

$^{19}\text{F}$  NMR (565 MHz, Chloroform-*d*)  $\delta$  -62.35.

$^{13}\text{C}$  NMR (151 MHz, Chloroform-*d*)  $\delta$  171.8, 163.9, 149.7, 148.5, 137.5, 126.5, 121.9, 62.7, 60.7, 38.0 (q,  $J = 30.2$  Hz), 28.9, 14.2, 7.9.

HRMS (ESI): found: 305.1119 ( $[\text{M}+\text{H}]^+$ ), calcd. Chemical Formula:  $\text{C}_{13}\text{H}_{16}\text{F}_3\text{N}_2\text{O}_3$ , Exact Mass: 305.1113.

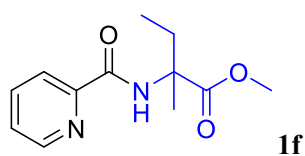

**methyl 2-methyl-2-(picolinamido)butanoate(1f)**, 1.8 g (10 mmol), 76%, Colorless liquid,  $R_f = 0.48$  (PE/EA=3:1, v/v).

$^1\text{H}$  NMR (600 MHz, Chloroform-*d*)  $\delta$  8.71 (s, 1H), 8.56 (s, 1H), 8.13 (d,  $J = 7.6$  Hz, 1H), 7.82 (t,  $J = 7.4$  Hz, 1H), 7.41 (s, 1H), 3.78 (s, 3H), 2.28-2.34 (m, 1H), 1.95- 2.01(m, 1H), 1.68 (s, 3H), 0.85 (t,  $J = 6$  Hz, 3H).

$^{13}\text{C}$  NMR (151 MHz, Chloroform-*d*)  $\delta$  174.7, 163.4, 150.1, 148.2, 137.4, 126.3, 122.0, 60.7, 52.7, 30.1, 22.6, 8.6.

HRMS (ESI): found: 237.1234 ( $[\text{M}+\text{H}]^+$ ), calcd. Chemical Formula:  $\text{C}_{12}\text{H}_{17}\text{N}_2\text{O}_3$ , Exact Mass: 237.1239.

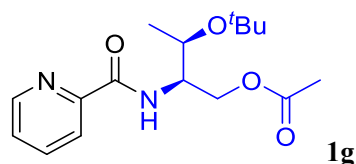

**(2R,3R)-3-(tert-butoxy)-2-(picolinamido)butyl acetate (1g)**, 2.0 g (10 mmol), 65%, colorless liquid,  $R_f = 0.46$  (PE/EA=3:1, v/v),  $[\alpha]_D^{28} = 20.62$  (c 0.12,  $\text{CHCl}_3$ ).

$^1\text{H}$  NMR (600 MHz, Chloroform-*d*)  $\delta$  8.58 (s, 1H), 8.28 (d,  $J = 9.2$  Hz, 1H), 8.18 (d,  $J = 7.7$  Hz, 1H), 7.84 (t,  $J = 7.5$  Hz, 1H), 7.43 (s, 1H), 4.33 – 4.25 (m, 1H), 4.19 (p,  $J = 9.6, 9.2$  Hz, 2H), 3.98 (d,  $J = 4.6$  Hz, 1H), 2.04 (s, 3H), 1.22 (s, 9H), 1.17 (d,  $J = 5.2$  Hz, 3H).

$^{13}\text{C}$  NMR (151 MHz, Chloroform-*d*)  $\delta$  171.1, 164.7, 149.8, 148.3, 137.4, 126.3, 122.4, 74.1, 65.5, 63.7, 53.30, 28.7, 21.0, 20.1.

HRMS (ESI): found: 309.1811 ( $[\text{M}+\text{H}]^+$ ), calcd. Chemical Formula:  $\text{C}_{16}\text{H}_{25}\text{N}_2\text{O}_4$ , Exact Mass: 309.1814.

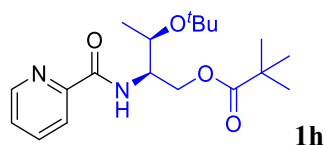

**(2R,3R)-3-(tert-butoxy)-2-(picolinamido)butyl pivalate (1h)**, 320 mg (1mmol), 90%, white solid, mp=64.9-65.5 °C,  $R_f = 0.49$  (PE/EA=3:1, v/v),  $[\alpha]_D^{28} = 20.60$  (c 0.12,  $\text{CHCl}_3$ ).

$^1\text{H}$  NMR (600 MHz, Chloroform-*d*)  $\delta$  8.58 (s, 1H), 8.28 (d,  $J = 8.6$  Hz, 1H), 8.18 (d,  $J = 7.8$  Hz, 1H), 7.84 (t,  $J = 7.5$  Hz, 1H), 7.43 (s, 1H), 4.31 (q,  $J = 7.5$  Hz, 1H), 4.21 (d,  $J = 7.1$  Hz, 1H), 4.19 – 4.15 (m, 1H), 4.00 – 3.95 (m, 1H), 1.23 (s, 9H), 1.19 (d,  $J = 6.4$  Hz, 3H), 1.17 (s, 9H).

$^{13}\text{C}$  NMR (151 MHz, Chloroform-*d*)  $\delta$  178.4, 164.7, 148.4, 137.4, 126.3, 122.4, 74.1, 65.5, 63.4, 53.3, 38.9, 28.8, 27.3, 20.3.

HRMS (ESI): found: 351.2287 ( $[\text{M}+\text{H}]^+$ ), calcd. Chemical Formula:  $\text{C}_{19}\text{H}_{31}\text{N}_2\text{O}_4$ , Exact Mass: 351.2284.

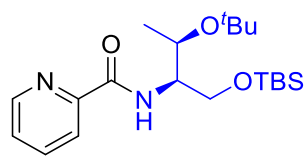

**N-((2R,3R)-3-(tert-butoxy)-1-((tert-butyldimethylsilyl)oxy)butan-2-yl) picolinamide (1i)**, 380.6 mg (1 mmol), 94%, white solid, mp=56.6-56.9 °C,  $R_f = 0.54$  (PE/EA=3:1, v/v),  $[\alpha]_D^{27} = 16.5$  (c 0.1,  $\text{CHCl}_3$ ).

$^1\text{H}$  NMR (600 MHz, Chloroform-*d*)  $\delta$  8.57 (s, 1H), 8.37 (d,  $J$  = 8.2 Hz, 1H), 8.19 (d,  $J$  = 7.3 Hz, 1H), 7.84 (t,  $J$  = 7.5 Hz, 1H), 7.41 (s, 1H), 4.10 (d,  $J$  = 4.7 Hz, 1H), 3.98 (s, 1H), 3.74 (d,  $J$  = 5.8 Hz, 1H), 3.66 (t,  $J$  = 8.6 Hz, 1H), 1.24 (s, 9H), 1.17 (d,  $J$  = 5.9 Hz, 3H), 0.90 (s, 9H), 0.08 (s, 3H), 0.05 (s, 3H).

$^{13}\text{C}$  NMR (151 MHz, Chloroform-*d*)  $\delta$  164.5, 150.3, 148.3, 137.4, 126.1, 122.3, 73.9, 64.6, 61.2, 55.9, 28.8, 26.0, 20.5, 18.3, -5.2, -5.3.

HRMS (ESI): found: 381.2578 ( $[\text{M}+\text{H}]^+$ ), calcd. Chemical Formula:  $\text{C}_{20}\text{H}_{37}\text{N}_2\text{O}_3\text{Si}$ , Exact Mass: 381.2573.

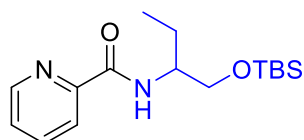

**1j**

**N-(1-((tert-butyldimethylsilyloxy)butan-2-yl)picolinamide (1j)**, 262.2 mg (1 mmol), 85%, colorless liquid,  $R_f$  = 0.52 (PE/EA=3:1, v/v).

$^1\text{H}$  NMR (600 MHz, Chloroform-*d*)  $\delta$  8.54 (s, 1H), 8.22 (d,  $J$  = 7.4 Hz, 1H), 8.19 (d,  $J$  = 7.7 Hz, 1H), 7.83 (t,  $J$  = 7.4 Hz, 1H), 7.40 (s, 1H), 4.05 (s, 1H), 3.81 – 3.62 (m, 2H), 1.75 (dt,  $J$  = 13.7, 6.9 Hz, 1H), 1.64 (dt,  $J$  = 13.9, 7.2 Hz, 1H), 0.97 (t,  $J$  = 7.2 Hz, 3H), 0.90 (s, 9H), 0.04 (s, 6H).

$^{13}\text{C}$  NMR (151 MHz, Chloroform-*d*)  $\delta$  164.0, 150.2, 148.1, 137.4, 126.1, 122.3, 64.4, 52.2, 26.0, 24.6, 18.4, 10.7, -5.3, -5.4.

The data is in agreement with that reported in the literature<sup>5</sup>.

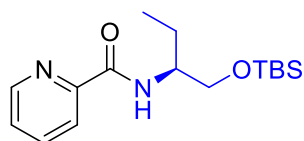

**1j-s**

**(S)-N-(1-((tert-butyldimethylsilyloxy)butan-2-yl)picolinamide (1j-s)**, 274.6 mg (1 mmol), 89%, colorless liquid,  $R_f$  = 0.52 (PE/EA=3:1, v/v),  $[\alpha]_D^{29} = -50.30$  (c 0.12,  $\text{CHCl}_3$ ).

$^1\text{H}$  NMR (600 MHz, Chloroform-*d*)  $\delta$  8.56 (s, 1H), 8.22 (d,  $J$  = 7.6 Hz, 1H), 7.85 (d,  $J$  = 7.2 Hz, 1H), 7.43 (s, 1H), 4.08 (s, 1H), 3.78 (d,  $J$  = 9.9 Hz, 1H), 3.73 – 3.68 (m, 1H), 1.82 – 1.74 (m, 1H), 1.67 (ddt,  $J$  = 15.7, 11.3, 6.7 Hz, 1H), 1.00 (t,  $J$  = 7.0 Hz, 4H), 0.93 (s, 8H), 0.07 (s, 6H).

$^{13}\text{C}$  NMR (151 MHz, Chloroform-*d*)  $\delta$  164.00, 150.23, 148.14, 137.38, 126.09, 122.29, 64.35, 52.19, 25.97, 24.64, 18.39, 10.74, -5.33, -5.37.

The data is in agreement with that reported in the literature<sup>5</sup>.

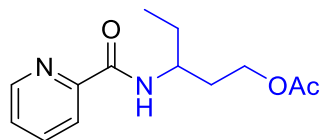

**1k**

**3-(picolinamido)pentyl acetate (1k)**, 237.8 mg (1 mmol), 95%, colorless liquid,  $R_f$  = 0.42 (PE/EA=3:1, v/v).

$^1\text{H}$  NMR (600 MHz, Chloroform-*d*)  $\delta$  8.53 (s, 1H), 8.19 (d,  $J$  = 7.7 Hz, 1H), 7.97 (d,  $J$  = 7.5 Hz, 1H), 7.85 (t,  $J$  = 7.5 Hz, 1H), 7.42 (s, 1H), 4.25 – 4.09 (m, 3H), 2.03 (s, 3H), 1.99 (d,  $J$  = 7.2 Hz, 1H), 1.85 (dd,  $J$  = 13.6, 6.1 Hz, 1H), 1.73 – 1.65 (m, 1H), 1.60 (dt,  $J$  = 14.0, 7.2 Hz, 1H), 0.96 (t,  $J$  = 7.1 Hz, 3H).



$^{13}\text{C}$  NMR (151 MHz, Chloroform-*d*)  $\delta$  171.2, 164.1, 149.9, 148.0, 137.6, 126.3, 122.5, 61.9, 48.4, 33.5, 28.1, 21.1, 10.5.

HRMS (ESI): found: 251.1390 ( $[\text{M}+\text{H}]^+$ ), calcd. Chemical Formula:  $\text{C}_{13}\text{H}_{19}\text{N}_2\text{O}_3$ , Exact Mass: 251.1396.

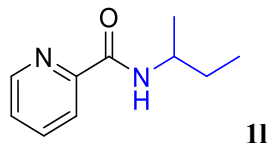

**N-(sec-butyl)picolinamide (1l)**, 2.82 g (20 mmol), 79%, white solid, mp=66.5-67.6 °C, *R*<sub>f</sub>= 0.45 (PE/EA=3:1, v/v).

$^1\text{H}$  NMR (600 MHz, Chloroform-*d*)  $\delta$  8.54 (s, 1H), 8.20 (s, 1H), 7.96 – 7.76 (m, 2H), 7.41 (s, 1H), 4.18 – 4.04 (m, 1H), 1.66 – 1.53 (m, 2H), 1.25 (s, 3H), 1.02 – 0.89 (m, 3H).

$^{13}\text{C}$  NMR (151 MHz, Chloroform-*d*)  $\delta$  163.7, 150.2, 148.0, 137.5, 126.1, 122.4, 122.4, 46.8, 29.9, 20.6, 10.6.

The data is in agreement with that reported in the literature<sup>5</sup>.

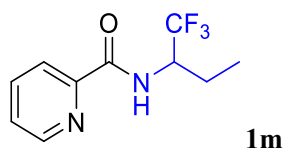

**N-(1,1,1-trifluorobutan-2-yl)picolinamide (1m)**, 998.4 mg (20 mmol), 86%, white solid, mp=79.6-80.7 °C, *R*<sub>f</sub>= 0.45 (PE/EA=3:1, v/v).

$^1\text{H}$  NMR (600 MHz, Chloroform-*d*)  $\delta$  8.58 (s, 1H), 8.22 (d, *J* = 7.1 Hz, 1H), 8.12 (d, *J* = 6.2 Hz, 1H), 7.88 (t, *J* = 6.7 Hz, 1H), 7.48 (s, 1H), 4.78 – 4.61 (m, 1H), 2.07 – 1.93 (m, 1H), 1.77 – 1.64 (m, 1H), 1.04 (t, *J* = 6.3 Hz, 3H).

$^{19}\text{F}$  NMR (565 MHz, Chloroform-*d*)  $\delta$  -75.74.

$^{13}\text{C}$  NMR (151 MHz, Chloroform-*d*)  $\delta$  164.7, 148.9, 148.3, 137.7, 126.9, 122.8, 52.2, 52.0, 51.8, 21.9, 9.9.

The data is in agreement with that reported in the literature<sup>6</sup>.

## Reference

- [1] He, G.; Zhao, Y.; Zhang, S.; Lu, C.; Chen G. *J. Am. Chem. Soc.* **2012**, *134*, 3–6.
- [2] Lukasevics, L.; Cizikovs, A.; Grigorjeva, L. *Org. Lett.* **2020**, *22*, 2720–2723.
- [3] Biswas, S.; Bheemireddy, N. R.; Bal, M.; Van Steijvoort, B. F.; Maes, B. U. W. *J. Org. Chem.* **2019**, *84*, 13112–13123.
- [4] Wang, P.-L.; Li, Y.; Wu, Y.; Li, C.; Lan, Q.; Wang X.-S. *Org. Lett.* **2015**, *17*, 3698–3701.
- [5] Li, Q.; Zhang, S.-Y.; He, G.; Nack, W. A.; Chen, G. *Adv. Syn. Cat.* **2014**, *356*(7): 1544-1548.
- [6] Nack, W. A.; He, G.; Zhang, S.-Y.; Lu, C.; Chen, G. *Org. Lett.* **2013**, *15*(13): 3440-3443.

## V Standard procedure for Pd-catalyzed C-H Arylation / C-N Coupling

### Scheme S5 standard procedure Pd-catalyzed C-H Arylation / C-N Coupling

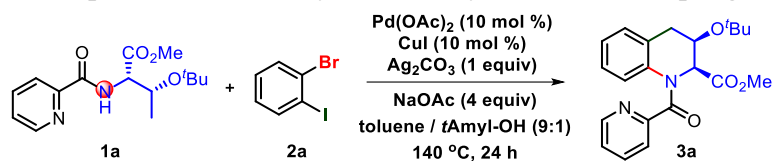

To an oven-dried Schlenk tube equipped with a magnetic stir bar added by amides (0.2 mmol), Pd(OAc)<sub>2</sub> (4.5 mg, 0.02 mmol, 10 mol%), Ag<sub>2</sub>CO<sub>3</sub> (55.0 mg, 0.2 mmol, 1equiv), CuI (3.9 mg, 0.02 mmol, 0.1 equiv) and NaOAc (65.6 mg, 0.8 mmol, 4 equiv). Then 0.9 mL of toluene and 0.1 mL of *t*-AmylOH were added sequentially and 2-bromo iodobenzene (0.3 mmol, 1.5 equiv) was injected into the resulting mixture with a microinjector. After that, the tube was sealed with a rubber stopper and the resulting mixture was stirred at 140 °C in an oil bath for 24 h. After the reaction was finished, the reaction mixture was cooled to room temperature and concentrated under reduced pressure. The residue was purified by column chromatography on silica gel using petroleum ether/ethyl acetate (1:1) as the eluent to give the desired product.

## VI Gram-scale synthesis of **3a** and removal of the protecting group

### Scheme S6 Gram-scale synthesis of **3a**

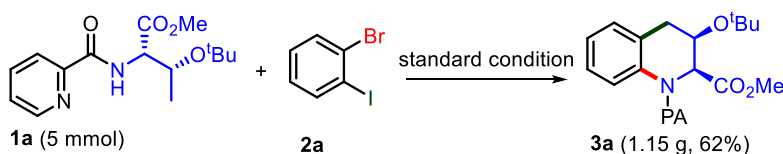

To an oven-dried Schlenk tube(100 mL) equipped with a magnetic stir bar added by methyl O-(tert-butyl)-N-picolinoyl-L-threoninate (**3a**, 5 mmol), Pd(OAc)<sub>2</sub> (112 mg, 0.5 mmol, 10 mol%), Ag<sub>2</sub>CO<sub>3</sub>(55.0 mg, 5 mmol, 1equiv), CuI (96 mg, 0.5 mmol, 0.1 equiv) and NaOAc (1.64 g, 20 mmol, 4 equiv). Then 22.5 mL of toluene and 2.5 mL of *t*-AmylOH were added sequentially and 2-bromo iodobenzene (7.5 mmol, 1.5 equiv) was injected into the resulting mixture. After that, the tube was sealed with a rubber stopper and the resulting mixture was stirred at 140 °C in an oil bath for 24 h. After the reaction was finished, the reaction mixture was cooled to room temperature and concentrated under reduced pressure. The residue was purified by column chromatography on silica gel using petroleum ether/ethyl acetate (1:1) as the eluent to give **3a** (1.15 g, 62%).

### Scheme S7 removal of picolinyl protecting group

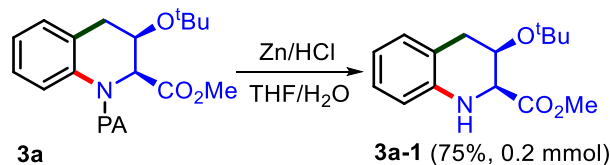

To a solution of compound **3a** (0.2 mmol, 74 mg) in a mixture of THF/H<sub>2</sub>O (2:1, 12 mL) an aqueous solution of HCl (1M, 2 mL) and Zn powder (2 mmol, 130 mg) were added, and the resulting solution was stirred at room temperature for 16 hours. After evaporation of the solvent, the resulting crude was diluted with EtOAc and washed with a saturated solution of NaHCO<sub>3</sub>. The organic phase was dried with Na<sub>2</sub>SO<sub>4</sub> and concentrated under reduced pressure. The residue was purified by column chromatography on silica gel using petroleum ether/ethyl acetate (3:1) as the eluent to give **3a-1** (39.5 mg, 75%).

## VII Characterization data for products

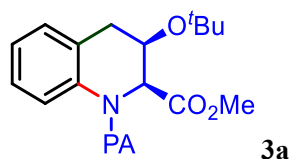

**methyl (2*S*,3*R*)-3-(tert-butoxy)-1-picolinoyl-1,2,3,4-tetrahydroquinoline-2-carboxylate (3a)**, 47.9 mg (0.2 mmol scale), 65%, light yellow solid,  $R_f = 0.4$  (PE/EtOAc = 1/1),  $[\alpha]_D^{25} = -83.80$  (c 0.502, CHCl<sub>3</sub>).

<sup>1</sup>H NMR (600 MHz, CDCl<sub>3</sub>)  $\delta$  8.43 (d,  $J = 3.7$  Hz, 1H), 7.68 (t,  $J = 7.5$  Hz, 1H), 7.53 (d,  $J = 7.3$  Hz, 1H), 7.25 (dd,  $J = 10.9, 4.9$  Hz, 1H), 7.13 (d,  $J = 7.3$  Hz, 1H), 7.00 (t,  $J = 7.3$  Hz, 1H), 6.85 (s, 1H), 6.58 (s, 1H), 5.18 (d,  $J = 6.8$  Hz, 1H), 4.52 (s, 1H), 3.74 (s, 3H), 3.10 (dd,  $J = 14.4, 6.9$  Hz, 1H), 2.91 – 2.71 (m, 1H), 1.15 (s, 9H).

<sup>13</sup>C NMR (151 MHz, CDCl<sub>3</sub>)  $\delta$  169.6, 168.7, 154.0, 148.9, 137.7, 136.7, 129.6, 128.8, 126.3, 125.0, 124.8, 124.3, 74.9, 68.3, 62.4, 52.0, 34.7, 28.4.

HRMS (ESI): found: 369.1811 ([M+H]<sup>+</sup>), calcd. Chemical Formula: C<sub>21</sub>H<sub>25</sub>N<sub>2</sub>O<sub>4</sub>, Exact Mass: 369.1814.

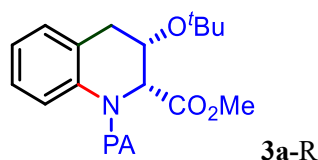

**methyl (2*R*,3*S*)-3-(tert-butoxy)-1-picolinoyl-1,2,3,4-tetrahydroquinoline-2-carboxylate (3a-R)**, 44.9 mg (0.2 mmol scale), 61%, light yellow oil,  $R_f = 0.4$  (PE/EtOAc = 1/1),  $[\alpha]_D^{25} = 93.00$  (c 0.514, CHCl<sub>3</sub>).

<sup>1</sup>H NMR (600 MHz, Chloroform-*d*)  $\delta$  8.44 (s, 1H), 7.72 – 7.65 (m, 1H), 7.53 (d,  $J = 6.1$  Hz, 1H), 7.27 (d,  $J = 16.4$  Hz, 1H), 7.15 (d,  $J = 7.1$  Hz, 1H), 7.01 (t,  $J = 7.1$  Hz, 1H), 6.86 (s, 1H), 6.52 (s, 1H), 5.18 (d,  $J = 6.4$  Hz, 1H), 4.54 (s, 1H), 3.75 (s, 3H), 3.12 (dd,  $J = 14.1, 6.4$  Hz, 1H), 2.85 (d,  $J = 14.2$  Hz, 1H), 1.16 (s, 9H).

<sup>13</sup>C NMR (151 MHz, Chloroform-*d*)  $\delta$  169.5, 168.6, 153.8, 148.9, 136.7, 129.5, 128.8, 126.3, 124.9, 124.8, 124.7, 124.2, 74.9, 68.2, 62.3, 52.0, 34.6, 28.4.

HRMS (ESI): found: 369.1817 ([M+H]<sup>+</sup>), calcd. Chemical Formula: C<sub>21</sub>H<sub>25</sub>N<sub>2</sub>O<sub>4</sub>, Exact Mass: 369.1814.

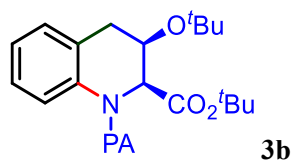

**tert-butyl (2*S*,3*R*)-3-(tert-butoxy)-1-picolinoyl-1,2,3,4-tetrahydroquinoline-2-carboxylate (3b)**, 43.5 mg (0.2 mmol scale), 53%, light yellow oil,  $R_f = 0.45$  (PE/EtOAc = 1/1),  $[\alpha]_D^{29} = -57.64$  (c 0.2, CHCl<sub>3</sub>).

<sup>1</sup>H NMR (600 MHz, CDCl<sub>3</sub>)  $\delta$  8.49 (d,  $J = 3.7$  Hz, 1H), 7.66 (t,  $J = 7.2$  Hz, 1H), 7.48 (s, 1H), 7.27 – 7.21 (m, 1H), 7.12 (d,  $J = 7.4$  Hz, 1H), 6.98 (t,  $J = 7.3$  Hz, 1H), 6.85 (s, 1H), 6.54 (s, 1H), 5.04 (d,  $J = 3.5$  Hz, 1H), 4.35 (s, 1H), 3.11 (dd,  $J = 13.9, 8.6$  Hz, 1H), 2.83 (d,  $J = 13.0$  Hz, 1H), 1.46 (s, 9H), 1.20 (s, 9H).

$^{13}\text{C}$  NMR (151 MHz,  $\text{CDCl}_3$ )  $\delta$  168.6, 168.1, 154.3, 149.1, 137.5, 136.6, 129.3, 128.7, 126.1, 124.6, 124.5, 124.0, 81.4, 74.8, 67.9, 62.1, 34.5, 28.3, 28.2.

HRMS (ESI): found: 411.2286 ( $[\text{M}+\text{H}]^+$ ), calcd. Chemical Formula:  $\text{C}_{24}\text{H}_{31}\text{N}_2\text{O}_4$ , Exact Mass: 411.2284.

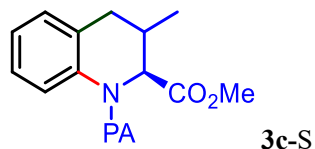

**methyl (2S)-3-methyl-1-picolinoyl-1,2,3,4-tetrahydroquinoline-2-carboxylate (3c-S)**, 46.5 mg (0.2 mmol scale), 75%, dr = 5.8:1, light yellow oil,  $R_f$  = 0.43 (PE/EtOAc = 1/1),  $[\alpha]_D^{25} = -232.48$  (c 0.45,  $\text{CHCl}_3$ ).

$^1\text{H}$  NMR (600 MHz, Chloroform-*d*)  $\delta$  8.39 (s, 1H), 7.70 (d,  $J$  = 24.5 Hz, 1H), 7.54 (d,  $J$  = 13.7 Hz, 1H), 7.26 (s, 1H), 7.14 (d,  $J$  = 7.1 Hz, 1H), 6.99 (s, 1H), 6.82 (s, 1H), 6.45 (s, 1H), 4.80 – 4.68 (m, 1H), 3.73 (s, 2H), 2.76 – 2.71 (m, 1H), 2.61 (t,  $J$  = 12.2 Hz, 1H), 2.05 (s, 1H), 1.41 (s, 2H), 1.24 (s, 1H).

$^{13}\text{C}$  NMR (151 MHz, Chloroform-*d*)  $\delta$  172.1, 171.8, 168.6, 168.5, 153.64, 148.8, 148.7, 138.3, 138.0, 136.6, 133.2, 131.8, 128.6, 128.4, 127.5, 127.3, 126.33, 126.25, 125.2, 125.0, 124.95, 124.88, 124.8, 124.5, 124.3, 124.2, 63.0, 52.5, 52.3, 40.6, 36.5, 35.0, 35.5, 32.0, 20.5.

HRMS (ESI): found: 311.1393 ( $[\text{M}+\text{H}]^+$ ), calcd. Chemical Formula:  $\text{C}_{18}\text{H}_{19}\text{N}_2\text{O}_3$ , Exact Mass: 311.1396.

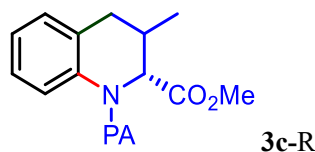

**methyl (2R)-3-methyl-1-picolinoyl-1,2,3,4-tetrahydroquinoline-2-carboxylate (3c-R)**, 49.0 mg (0.2 mmol scale), 79%, dr = 3.6:1, light yellow oil,  $R_f$  = 0.43 (PE/EtOAc = 1/1),  $[\alpha]_D^{25} = 159.12$  (c 0.45,  $\text{CHCl}_3$ ).

$^1\text{H}$  NMR (600 MHz, Chloroform-*d*)  $\delta$  8.39 (s, 1H), 7.70 (d,  $J$  = 18.9 Hz, 1H), 7.58 – 7.49 (m, 1H), 7.24 (d,  $J$  = 4.8 Hz, 1H), 7.14 (d,  $J$  = 7.1 Hz, 1H), 6.99 (s, 1H), 6.82 (s, 1H), 6.45 (s, 1H), 4.79 – 4.70 (m, 1H), 3.75 (s, 1H), 3.73 (s, 2H), 2.73 (d,  $J$  = 13.6 Hz, 1H), 2.61 (d,  $J$  = 12.7 Hz, 1H), 2.06 (s, 1H), 1.41 (s, 2H), 1.25 (s, 1H).

$^{13}\text{C}$  NMR (151 MHz, Chloroform-*d*)  $\delta$  172.0, 171.7, 170.5, 168.6, 168.5, 153.9, 153.6, 148.74, 148.65, 138.3, 137.9, 137.1, 136.6, 136.5, 128.5, 128.3, 127.4, 127.2, 126.3, 126.2, 125.2, 124.9, 124.7, 124.5, 124.1, 62.9, 60.8, 52.4, 52.2, 51.8, 40.6, 36.4, 34.9, 33.5, 31.9, 20.3, 16.8.

HRMS (ESI): found: 311.1390 ( $[\text{M}+\text{H}]^+$ ), calcd. Chemical Formula:  $\text{C}_{18}\text{H}_{19}\text{N}_2\text{O}_3$ , Exact Mass: 311.1396.

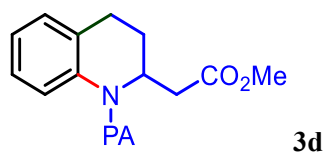

**methyl 2-(1-picolinoyl-1,2,3,4-tetrahydroquinolin-2-yl)acetate (3d)**, 37.9 mg (0.2 mmol scale), 61%, light yellow oil,  $R_f$  = 0.43 (PE/EtOAc = 1/1).

$^1\text{H}$  NMR (600 MHz,  $\text{CDCl}_3$ )  $\delta$  8.46 (s, 1H), 7.60 (s, 1H), 7.30 (s, 1H), 7.21 (s, 1H), 7.15 (d,  $J = 7.4$  Hz, 1H), 7.00 (t,  $J = 7.0$  Hz, 1H), 6.84 (s, 1H), 6.49 (s, 1H), 4.97 (s, 1H), 3.70 – 3.58 (m, 1H), 3.37 – 3.28 (m, 4H), 2.82 – 2.72 (m, 2H), 2.42 (s, 1H), 1.77 (s, 1H).

$^{13}\text{C}$  NMR (151 MHz, Chloroform- $d$ )  $\delta$  171.2, 171.1, 168.2, 154.7, 148.9, 148.0, 137.5, 126.4, 126.1, 126.0, 125.3, 124.3, 123.6, 122.4, 61.7, 61.5, 44.6, 33.7, 21.12, 21.06.

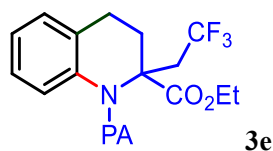

**ethyl 1-picolinoyl-2-(2,2,2-trifluoroethyl)-1,2,3,4-tetrahydroquinoline-2-carboxylate (3e)**, 52.6 mg (0.2 mmol scale), 67%, light yellow oil,  $R_f = 0.46$  (PE/EtOAc = 1/1).

$^1\text{H}$  NMR (600 MHz, Chloroform- $d$ )  $\delta$  8.54 (d,  $J = 4.8$  Hz, 1H), 7.55 (t,  $J = 7.7$  Hz, 1H), 7.21 (dd,  $J = 14.6, 6.9$  Hz, 2H), 7.13 (d,  $J = 7.4$  Hz, 1H), 6.98 (t,  $J = 7.5$  Hz, 1H), 6.77 (t,  $J = 7.8$  Hz, 1H), 6.43 (d,  $J = 8.1$  Hz, 1H), 4.33 – 4.19 (m, 2H), 3.87 (dq,  $J = 15.3, 11.5$  Hz, 1H), 3.23 (t,  $J = 13.7$  Hz, 1H), 2.91 (dq,  $J = 15.5, 10.8$  Hz, 1H), 2.61 (d,  $J = 14.5$  Hz, 1H), 2.40 – 2.33 (m, 2H), 2.35 – 2.28 (m, 1H), 1.26 (t,  $J = 7.1$  Hz, 3H).

$^{19}\text{F}$  NMR (565 MHz, DMSO- $d_6$ )  $\delta$  -58.72.

$^{13}\text{C}$  NMR (151 MHz,  $\text{CDCl}_3$ )  $\delta$  171.9, 169.7, 154.3, 149.6, 137.6, 136.3, 133.4, 127.2, 127.1, 126.5, 126.3, 125.3, 125.2, 124.5, 123.4, 63.2, 62.4, 37.5(q,  $J = 3$  Hz), 35.1, 25.3, 14.2.

HRMS (ESI): found: 393.1430 ( $[\text{M}+\text{H}]^+$ ), calcd. Chemical Formula:  $\text{C}_{20}\text{H}_{20}\text{F}_3\text{N}_2\text{O}_3$ , Exact Mass: 393.1426.

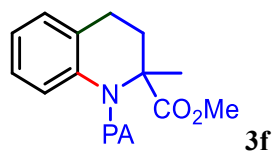

**methyl 2-methyl-1-picolinoyl-1,2,3,4-tetrahydroquinoline-2-carboxylate (3f)**, 36.0 mg (0.2 mmol scale), 58%, light yellow oil,  $R_f = 0.42$  (PE/EtOAc = 1/1).

$^1\text{H}$  NMR (600 MHz,  $\text{CDCl}_3$ )  $\delta$  8.52 (s, 1H), 7.57 (s, 1H), 7.22 (s, 1H), 7.14 (d,  $J = 7.0$  Hz, 1H), 6.97 (t,  $J = 7.2$  Hz, 1H), 6.78 (t,  $J = 7.3$  Hz, 1H), 6.46 (d,  $J = 7.6$  Hz, 1H), 3.78 (s, 3H), 3.10 (t,  $J = 12.9$  Hz, 1H), 2.64 (d,  $J = 14.2$  Hz, 1H), 2.38 (d,  $J = 13.5$  Hz, 1H), 1.78 (d,  $J = 14.0$  Hz, 4H).

$^{13}\text{C}$  NMR (151 MHz,  $\text{CDCl}_3$ )  $\delta$  174.1, 168.8, 154.6, 149.5, 137.9, 136.4, 134.6, 127.2, 126.3, 126.2, 125.1, 124.5, 123.6, 63.6, 52.8, 39.2, 25.9, 23.5.

HRMS (ESI): found: 311.1398 ( $[\text{M}+\text{H}]^+$ ), calcd. Chemical Formula:  $\text{C}_{18}\text{H}_{19}\text{N}_2\text{O}_3$ , Exact Mass: 311.1396.

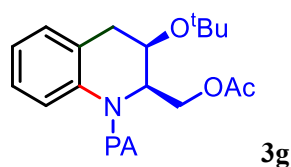

**(2R,3R)-3-(tert-butoxy)-1-picolinoyl-1,2,3,4-tetrahydroquinolin-2-yl)methyl acetate (3g)**, 55.1 mg (0.2 mmol scale), 72%, light yellow oil,  $R_f = 0.42$  (PE/EtOAc = 1/1),  $[\alpha]_D^{25} = -150.12$  (c 0.364,  $\text{CHCl}_3$ ).

$^1\text{H}$  NMR (600 MHz,  $\text{CDCl}_3$ )  $\delta$  8.50 (s, 1H), 7.75 (s, 1H), 7.58 (s, 1H), 7.30 (s, 1H), 7.27 (s, 1H), 7.12 (d,  $J = 7.1$  Hz, 1H), 7.03 (s, 1H), 6.91 (s, 1H), 4.53 (d,  $J = 11.2$  Hz, 1H), 4.24 (s, 1H), 3.92 (t,  $J = 10.5$  Hz, 1H), 3.16 (dd,  $J = 17.1, 6.9$  Hz, 1H), 2.73 (dd,  $J = 17.3, 10.2$  Hz, 1H), 2.02 (s, 3H), 1.20 (s, 9H).

$^{13}\text{C}$  NMR (151 MHz,  $\text{CDCl}_3$ )  $\delta$  171.1, 168.4, 154.8, 148.8, 136.8, 129.2, 128.6, 126.0, 125.7, 125.1, 124.6, 123.7, 74.8, 65.6, 60.3, 33.9, 28.3, 21.1.

HRMS (ESI): found: 383.1967 ( $[\text{M}+\text{H}]^+$ ), calcd. Chemical Formula:  $\text{C}_{22}\text{H}_{27}\text{N}_2\text{O}_4$ , Exact Mass: 383.1971.

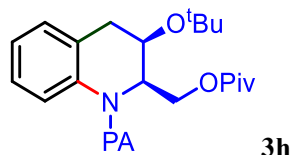

**((2R,3R)-3-(tert-butoxy)-1-picolinoyl-1,2,3,4-tetrahydroquinolin-2-yl)methyl pivalate (3h)**, 54.3 mg (0.2 mmol scale), 64%, light yellow oil,  $R_f = 0.48$  (PE/EtOAc = 1/1),  $[\alpha]^{25}_{\text{D}} = -144.18$  (c 0.338,  $\text{CHCl}_3$ ).

$^1\text{H}$  NMR (600 MHz,  $\text{CDCl}_3$ )  $\delta$  8.47 (s, 1H), 7.76 (s, 1H), 7.60 (s, 1H), 7.29 (s, 1H), 7.26 – 7.25 (m, 1H), 7.12 (d,  $J = 7.3$  Hz, 1H), 7.02 (s, 1H), 6.89 (s, 1H), 4.43 (s, 1H), 4.32 (d,  $J = 6.6$  Hz, 1H), 3.93 (d,  $J = 10.6$  Hz, 1H), 3.21 (dd,  $J = 17.3, 7.4$  Hz, 1H), 2.74 (dd,  $J = 17.4, 9.8$  Hz, 1H), 1.23 (s, 9H), 1.14 (s, 9H).

$^{13}\text{C}$  NMR (151 MHz,  $\text{CDCl}_3$ )  $\delta$  178.4, 168.2, 154.9, 148.6, 136.9, 129.3, 128.8, 125.9, 125.5, 125.0, 124.6, 123.9, 74.8, 65.6, 60.3, 38.8, 34.2, 28.4, 27.3.

HRMS (ESI): found: 425.2445 ( $[\text{M}+\text{H}]^+$ ), calcd. Chemical Formula:  $\text{C}_{25}\text{H}_{33}\text{N}_2\text{O}_4$ , Exact Mass: 425.2440.

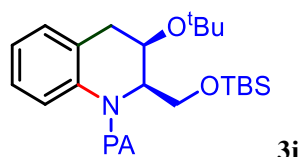

**((2R,3R)-3-(tert-butoxy)-2-(((tert-butyldimethylsilyl)oxy)methyl)-3,4-dihydroquinolin-1(2H)-yl)(pyridin-2-yl)methanone (3i)**, 55.5 mg (0.2 mmol scale), 61%, light yellow oil,  $R_f = 0.52$  (PE/EtOAc = 1/1),  $[\alpha]^{25}_{\text{D}} = -118.94$  (c 0.398,  $\text{CHCl}_3$ ).

$^1\text{H}$  NMR (600 MHz,  $\text{CDCl}_3$ )  $\delta$  8.68 (s, 1H), 7.94 (t,  $J = 7.2$  Hz, 1H), 7.81 (s, 1H), 7.47 (s, 1H), 7.44 (s, 1H), 7.26 (t,  $J = 17.6$  Hz, 3H), 4.47 (s, 1H), 4.00 (d,  $J = 24.0$  Hz, 1H), 3.65 (s, 1H), 3.31 (dd,  $J = 16.9, 7.3$  Hz, 1H), 2.84 (dd,  $J = 16.5, 10.3$  Hz, 1H), 1.37 (s, 9H), 0.98 (s, 9H), 0.05 (s, 3H), -0.00 (s, 3H).

$^{13}\text{C}$  NMR (151 MHz,  $\text{CDCl}_3$ )  $\delta$  168.6, 155.6, 148.6, 136.8, 129.0, 129.0, 125.9, 124.8, 124.2, 123.8, 74.64 (s), 65.62 (s), 58.63 (s), 34.26 (s), 28.41 (s), 26.00 (s), 18.33 (s), -5.38 (s), -5.55 (s).

HRMS (ESI): found: 455.2735 ( $[\text{M}+\text{H}]^+$ ), calcd. Chemical Formula:  $\text{C}_{26}\text{H}_{39}\text{N}_2\text{O}_3\text{Si}$ , Exact Mass: 455.2730.

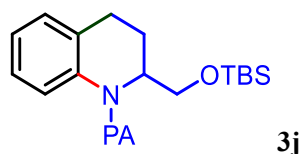

**2-(((tert-butyldimethylsilyl)oxy)methyl)-3,4-dihydroquinolin-1(2H)-yl)(pyridin-2-yl)**

**methanone (3j)**, 46.7 mg (0.2 mmol scale), 61%, light yellow oil,  $R_f = 0.54$  (PE/EtOAc = 1/1),

$^1\text{H}$  NMR (600 MHz,  $\text{CDCl}_3$ )  $\delta$  8.47 (s, 1H), 7.59 (s, 1H), 7.26 – 7.25 (m, 1H), 7.20 (s, 1H), 7.13 (d,  $J = 7.4$  Hz, 1H), 6.97 (t,  $J = 6.7$  Hz, 1H), 6.81 (s, 1H), 6.46 (s, 1H), 4.77 (s, 1H), 3.87 (dd,  $J = 9.7, 4.1$  Hz,

1H), 3.66 (s, 1H), 2.74 (d,  $J = 5.0$  Hz, 2H), 2.37 (s, 1H), 1.86 (dd,  $J = 12.6, 7.1$  Hz, 1H), 0.76 (s, 9H), -0.02 (d,  $J = 11.6$  Hz, 6H).

$^{13}\text{C}$  NMR (151 MHz,  $\text{CDCl}_3$ )  $\delta$  168.5, 155.0, 149.1, 136.3, 127.5, 126.0, 125.9, 125.05, 124.20, 123.5, 63.8, 54.9, 26.0, 25.8, 18.2, -5.3, -5.4.

HRMS (ESI): found: 383.2153 ( $[\text{M}+\text{H}]^+$ ), calcd. Chemical Formula:  $\text{C}_{22}\text{H}_{31}\text{N}_2\text{O}_2\text{Si}$ , Exact Mass: 383.2155.

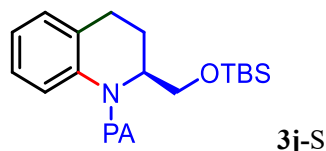

**(S)-2-(((tert-butyldimethylsilyloxy)methyl)-3,4-dihydroquinolin-1(2H)-yl)(pyridin-2-yl)methanone (3j)**, 44.4 mg (0.2 mmol scale), 58%, light yellow oil,  $R_f = 0.54$  (PE/EtOAc = 1/1),  $[\alpha]_D^{25} = -226.54$  (c 0.806,  $\text{CHCl}_3$ ).

$^1\text{H}$  NMR (600 MHz, Chloroform- $d$ )  $\delta$  8.47 (s, 1H), 7.60 (s, 1H), 7.26 (s, 1H), 7.23–7.17 (m, 1H), 7.13 (d,  $J = 7.4$  Hz, 1H), 6.97 (t,  $J = 7.3$  Hz, 1H), 6.82 (s, 1H), 6.49 (s, 1H), 4.77 (s, 1H), 3.87 (dd,  $J = 9.8, 4.5$  Hz, 1H), 3.67 (d,  $J = 6.8$  Hz, 1H), 2.75 (t,  $J = 5.6$  Hz, 2H), 2.41 – 2.31 (m, 1H), 1.86 (td,  $J = 16.7, 15.0, 7.0$  Hz, 1H), 0.77 (s, 9H), -0.02 (d,  $J = 11.4$  Hz, 6H).

$^{13}\text{C}$  NMR (151 MHz, Chloroform- $d$ )  $\delta$  168.4, 155.0, 149.0, 136.5, 126.0, 125.9, 125.1, 124.2, 123.5, 26.0, 25.8, 18.2 -5.3, -5.4.

HRMS (ESI): found: 383.2153 ( $[\text{M}+\text{H}]^+$ ), calcd. Chemical Formula:  $\text{C}_{22}\text{H}_{31}\text{N}_2\text{O}_2\text{Si}$ , Exact Mass: 383.2150.

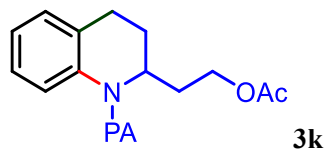

**2-(1-picolinoyl-1,2,3,4-tetrahydroquinolin-2-yl)ethyl acetate (3k)**, 50.6 mg (0.2 mmol scale), 78%, light yellow oil,  $R_f = 0.44$  (PE/EtOAc = 1/1).

$^1\text{H}$  NMR (600 MHz, Chloroform- $d$ )  $\delta$  8.44 (s, 1H), 7.63 (s, 1H), 7.35 (s, 1H), 7.21 (s, 1H), 7.14 (d,  $J = 7.5$  Hz, 1H), 7.00 (s, 1H), 6.80 (s, 1H), 6.37 (s, 1H), 4.27 – 4.05 (m, 3H), 2.81 (ddt,  $J = 28.7, 15.4, 7.5$  Hz, 2H), 2.03 (s, 2H), 2.02 (s, 3H), 1.80 – 1.69 (m, 2H).

$^{13}\text{C}$  NMR (151 MHz,  $\text{CDCl}_3$ )  $\delta$  171.2, 171.1, 168.2, 164.1, 154.8, 149.7, 148.9, 148.1, 137.6, 136.5, 128.2, 126.4, 126.1, 125.3, 124.3, 123.6, 122.4, 61.7, 61.6, 44.7, 33.8, 21.1, 21.1.

HRMS (ESI): found: 325.1548 ( $[\text{M}+\text{H}]^+$ ), calcd. Chemical Formula:  $\text{C}_{19}\text{H}_{21}\text{N}_2\text{O}_3$ , Exact Mass: 325.1552.

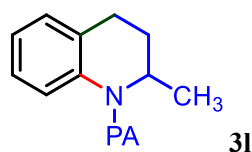

**(2-methyl-3,4-dihydroquinolin-1(2H)-yl)(pyridin-2-yl)methanone (3l)**, 49.6 mg (0.2 mmol scale), 87%, light yellow oil,  $R_f = 0.5$  (PE/EtOAc = 1/1).

$^1\text{H}$  NMR (600 MHz, Chloroform-*d*)  $\delta$  8.49 (s, 1H), 7.61 (s, 1H), 7.28 (d,  $J = 16.7$  Hz, 1H), 7.22 (s, 1H), 7.15 (d,  $J = 7.4$  Hz, 1H), 7.00 (t,  $J = 7.2$  Hz, 1H), 6.84 (s, 1H), 6.59 (s, 1H), 4.85 (s, 1H), 2.77 (q,  $J = 15.0, 11.2$  Hz, 2H), 2.43 (s, 1H), 1.54 (s, 1H), 1.28 (d,  $J = 6.4$  Hz, 3H).

$^{13}\text{C}$  NMR (151 MHz, Chloroform-*d*)  $\delta$  168.0, 155.1, 148.1, 137.5, 149.0, 136.4, 127.8, 126.2, 125.9, 125.1, 124.2, 123.4, 49.6, 31.8, 25.7, 19.5.

HRMS (ESI): found: 253.1343 ( $[\text{M}+\text{H}]^+$ ), calcd. Chemical Formula:  $\text{C}_{16}\text{H}_{17}\text{N}_2\text{O}$ , Exact Mass: 253.1341.

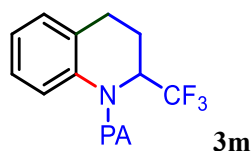

**pyridin-2-yl(2-(trifluoromethyl)-3,4-dihydroquinolin-1(2H)-yl)methanone (3m)**, 49.6 mg (0.2 mmol scale), 81%, light yellow oil,  $R_f = 0.49$  (PE/EtOAc = 1/1).

$^1\text{H}$  NMR (600 MHz,  $\text{CDCl}_3$ )  $\delta$  8.36 (s, 1H), 7.68 (t,  $J = 7.6$  Hz, 1H), 7.44 (d,  $J = 7.6$  Hz, 1H), 7.23 (t,  $J = 7.9$  Hz, 2H), 7.09 (dd,  $J = 14.8, 7.4$  Hz, 1H), 6.90 (t,  $J = 7.5$  Hz, 1H), 6.57 (s, 1H), 5.66 – 5.55 (m, 1H), 2.83 (d,  $J = 4.7$  Hz, 2H), 2.73 – 2.63 (m, 1H), 2.01 (dt,  $J = 16.1, 8.2$  Hz, 1H).

$^{19}\text{F}$  NMR (565 MHz, Chloroform-*d*)  $\delta$  -73.96.

$^{13}\text{C}$  NMR (151 MHz,  $\text{CDCl}_3$ )  $\delta$  168.5, 153.7, 148.7, 138.1, 136.5, 134.4, 127.3, 126.7, 126.3, 126.0, 124.6, 123.7, 52.6, 52.4, 52.2, 25.4, 25.3.

HRMS (ESI): found: 307.1055 ( $[\text{M}+\text{H}]^+$ ), calcd. Chemical Formula:  $\text{C}_{16}\text{H}_{14}\text{F}_3\text{N}_2\text{O}$ , Exact Mass: 307.1058.

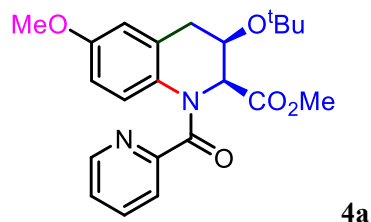

**methyl (2S,3R)-3-(tert-butoxy)-6-methoxy-1-picolinoyl-1,2,3,4-tetrahydroquinoline-2-carboxylate (4a)**, 47.8 mg (0.2 mmol scale), 60%, light yellow oil,  $R_f = 0.40$  (PE/EtOAc = 1/1),  $[\alpha]^{25}_D = -86.45$  (c 0.44,  $\text{CHCl}_3$ ).

$^1\text{H}$  NMR (600 MHz,  $\text{CDCl}_3$ )  $\delta$  8.46 (s, 1H), 7.67 (s, 1H), 7.48 (s, 1H), 7.25 (s, 1H), 6.69 (s, 1H), 6.36 (s, 2H), 5.19 (s, 1H), 4.53 (s, 1H), 3.73 (d,  $J = 6.0$  Hz, 6H), 3.06 (s, 1H), 2.82 (dd,  $J = 14.4, 2.0$  Hz, 1H), 1.16 (s, 9H).

$^{13}\text{C}$  NMR (151 MHz,  $\text{CDCl}_3$ )  $\delta$  169.5, 168.2, 156.9, 154.0, 148.9, 136.7, 131.0, 125.6, 124.6, 124.2, 114.1, 111.6, 74.9, 68.2, 62.2, 55.4, 51.9, 35.0, 28.4.

HRMS (ESI): found: 399.1921 ( $[\text{M}+\text{H}]^+$ ), calcd. Chemical Formula:  $\text{C}_{22}\text{H}_{27}\text{N}_2\text{O}_5$ , Exact Mass: 399.1920.



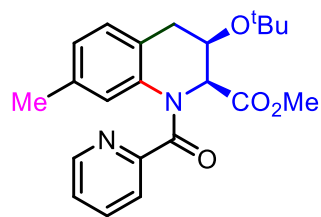

**4b**

**methyl (2*S*,3*R*)-3-(tert-butoxy)-7-methyl-1-picolinoyl-1,2,3,4-tetrahydroquinoline-2-carboxylate (4b)**, 48.1 mg (0.2 mmol scale), 63%, light yellow oil,  $R_f = 0.40$  (PE/EtOAc = 1/1),  $[\alpha]_D^{25} = -68.26$  (c 0.576, CHCl<sub>3</sub>).

<sup>1</sup>H NMR (600 MHz, CDCl<sub>3</sub>)  $\delta$  8.47 (d,  $J = 2.7$  Hz, 1H), 7.68 (t,  $J = 7.5$  Hz, 1H), 7.50 (d,  $J = 6.4$  Hz, 1H), 7.26 (d,  $J = 5.9$  Hz, 1H), 7.00 (d,  $J = 7.5$  Hz, 1H), 6.80 (d,  $J = 7.4$  Hz, 1H), 6.34 (s, 1H), 5.16 (d,  $J = 6.6$  Hz, 1H), 4.48 (s, 1H), 3.75 (s, 3H), 3.06 (dd,  $J = 14.3, 6.9$  Hz, 1H), 2.80 (d,  $J = 14.4$  Hz, 1H), 1.99 (s, 3H), 1.16 (s, 9H).

<sup>13</sup>C NMR (151 MHz, CDCl<sub>3</sub>)  $\delta$  169.6, 168.6, 154.1, 148.9, 137.2, 136.7, 135.9, 128.5, 126.3, 125.8, 125.4, 124.6, 124.2, 74.9, 68.2, 62.2, 52.0, 34.2, 28.4, 21.1.

HRMS (ESI): found: 383.1975 ([M+H]<sup>+</sup>), calcd. Chemical Formula: C<sub>22</sub>H<sub>27</sub>N<sub>2</sub>O<sub>4</sub>, Exact Mass: 383.1971.

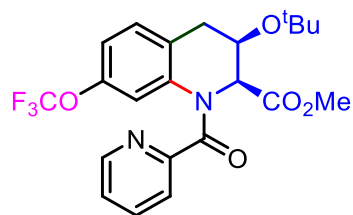

**4c**

**methyl (2*S*,3*R*)-3-(tert-butoxy)-1-picolinoyl-6-(trifluoromethoxy)-1,2,3,4-tetrahydroquinoline-2-carboxylate (4c)**, 60.6 mg (0.2 mmol scale), 67%, light yellow oil,  $R_f = 0.40$  (PE/EtOAc = 1/1),  $[\alpha]_D^{25} = -106.42$  (c 0.666, CHCl<sub>3</sub>).

<sup>1</sup>H NMR (600 MHz, CDCl<sub>3</sub>)  $\delta$  8.38 (d,  $J = 3.8$  Hz, 1H), 7.75 (t,  $J = 7.6$  Hz, 1H), 7.66 (d,  $J = 7.7$  Hz, 1H), 7.29 (d,  $J = 6.1$  Hz, 1H), 7.14 (d,  $J = 8.2$  Hz, 1H), 6.87 (d,  $J = 8.2$  Hz, 1H), 6.43 (s, 1H), 5.19 (d,  $J = 6.8$  Hz, 1H), 4.60 (s, 1H), 3.75 (s, 3H), 3.07 (dd,  $J = 14.6, 6.3$  Hz, 1H), 2.86 (d,  $J = 14.5$  Hz, 1H), 1.15 (s, 9H).

<sup>19</sup>F NMR (565 MHz, Chloroform-*d*)  $\delta$  -58.16.

<sup>13</sup>C NMR (151 MHz, CDCl<sub>3</sub>)  $\delta$  169.2, 168.6, 153.0, 148.8, 147.1, 138.8, 137.0, 129.6, 128.2, 125.2, 124.5, 121.1, 119.4, 117.9, 117.8, 75.1, 67.9, 62.4, 52.1, 34.3, 28.4.

HRMS (ESI): found: 453.1639 ([M+H]<sup>+</sup>), calcd. Chemical Formula: C<sub>22</sub>H<sub>24</sub>F<sub>3</sub>N<sub>2</sub>O<sub>5</sub>, Exact Mass: 453.1637.

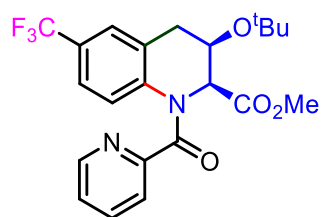

**4d**

**methyl (2*S*,3*R*)-3-(tert-butoxy)-1-picolinoyl-6-(trifluoromethyl)-1,2,3,4-tetrahydroquinoline-2-carboxylate (4c)**, 49.8 mg (0.2 mmol scale), 57%, light yellow oil,  $R_f = 0.40$  (PE/EtOAc = 1/1),

$[\alpha]^{25}_D = -123.82$  (c 0.556,  $\text{CHCl}_3$ ).

$^1\text{H NMR}$  (600 MHz,  $\text{CDCl}_3$ )  $\delta$  8.38 (d,  $J = 3.7$  Hz, 1H), 7.77 (t,  $J = 7.6$  Hz, 1H), 7.68 (d,  $J = 7.7$  Hz, 1H), 7.40 (s, 1H), 7.33 – 7.28 (m, 1H), 7.13 (d,  $J = 8.1$  Hz, 1H), 6.69 (s, 1H), 5.20 (d,  $J = 6.8$  Hz, 1H), 4.62 (s, 1H), 3.75 (s, 3H), 3.10 (dd,  $J = 14.6, 6.2$  Hz, 1H), 2.92 (d,  $J = 14.6$  Hz, 1H), 1.15 (s, 9H).

$^{19}\text{F NMR}$  (565 MHz, Chloroform-*d*)  $\delta$  -62.10.

$^{13}\text{C NMR}$  (151 MHz,  $\text{CDCl}_3$ )  $\delta$  169.2, 168.6, 153.0, 148.7, 141.1, 137.1, 130.1, 127.1, 126.9, 126.8, 126.6, 126.4, 126.0, 125.9, 125.9, 125.9, 125.34, 125.1, 124.7, 124.6, 123.4, 123.4, 123.4, 123.4, 123.3, 75.2, 67.8, 62.7, 52.1, 34.8, 28.4.

HRMS (ESI): found: 437.1684 ( $[\text{M}+\text{H}]^+$ ), calcd. Chemical Formula:  $\text{C}_{22}\text{H}_{24}\text{F}_3\text{N}_2\text{O}_4$ , Exact Mass: 437.1688.

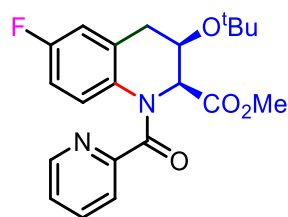

**4e**

**methyl (2*S*,3*R*)-3-(tert-butoxy)-6-fluoro-1-picolinoyl-1,2,3,4-tetrahydroquinoline-2-carboxylate (4e)**, 50.2 mg (0.2 mmol scale), 61%, light yellow oil,  $R_f = 0.40$  (PE/EtOAc = 1/1),  $[\alpha]^{25}_D = -144.34$  (c 0.388,  $\text{CHCl}_3$ ).

$^1\text{H NMR}$  (600 MHz,  $\text{CDCl}_3$ )  $\delta$  8.41 (s, 1H), 7.73 (t,  $J = 7.3$  Hz, 1H), 7.60 (s, 1H), 7.27 (s, 1H), 6.86 (d,  $J = 8.3$  Hz, 1H), 6.57 (s, 1H), 6.43 (s, 1H), 5.20 (d,  $J = 5.7$  Hz, 1H), 4.62 (s, 1H), 3.74 (s, 3H), 3.03 (dd,  $J = 14.4, 5.3$  Hz, 1H), 2.86 (d,  $J = 14.5$  Hz, 1H), 1.14 (s, 9H).

$^{19}\text{F NMR}$  (565 MHz, Chloroform-*d*)  $\delta$  -117.85.

$^{13}\text{C NMR}$  (151 MHz,  $\text{CDCl}_3$ )  $\delta$  169.3, 168.3, 160.8, 159.2, 153.5, 148.7, 136.9, 132.0, 126.1, 125.0, 124.5, 115.6, 115.4, 113.3, 113.1, 75.0, 68.0, 62.6, 52.0, 34.9, 29.8, 28.5.

HRMS (ESI): found: 387.1723 ( $[\text{M}+\text{H}]^+$ ), calcd. Chemical Formula:  $\text{C}_{21}\text{H}_{24}\text{FN}_2\text{O}_4$ , Exact Mass: 387.1720.

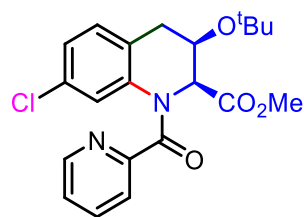

**4f**

**methyl (2*S*,3*R*)-3-(tert-butoxy)-6-chloro-1-picolinoyl-1,2,3,4-tetrahydroquinoline-2-carboxylate (4f)**, 55.6 mg (0.2 mmol scale), 69%, light yellow oil,  $R_f = 0.40$  (PE/EtOAc = 1/1),  $[\alpha]^{25}_D = -85.20$  (c 0.544,  $\text{CHCl}_3$ ).

$^1\text{H NMR}$  (600 MHz,  $\text{CDCl}_3$ )  $\delta$  8.42 (s, 1H), 7.76 (d,  $J = 7.4$  Hz, 1H), 7.66 (d,  $J = 6.9$  Hz, 1H), 7.32 (d,  $J = 3.8$  Hz, 1H), 7.06 (d,  $J = 7.6$  Hz, 1H), 6.99 (d,  $J = 7.8$  Hz, 1H), 6.59 (s, 1H), 5.17 (d,  $J = 6.2$  Hz, 1H), 4.59 (s, 1H), 3.74 (s, 3H), 3.06 – 2.94 (m, 1H), 2.83 (d,  $J = 14.6$  Hz, 1H), 1.14 (s, 9H).

$^{13}\text{C NMR}$  (151 MHz,  $\text{CDCl}_3$ )  $\delta$  169.2, 168.3, 153.1, 148.6, 138.7, 137.1, 131.4, 129.7, 128.0, 125.2, 125.0, 124.7, 124.5, 75.0, 67.8, 62.5, 52.1, 34.3, 28.4.

HRMS (ESI): found: 403.1423 ([M+H]<sup>+</sup>), calcd. Chemical Formula: C<sub>21</sub>H<sub>24</sub>ClN<sub>2</sub>O<sub>4</sub>, Exact Mass: 403.1425.

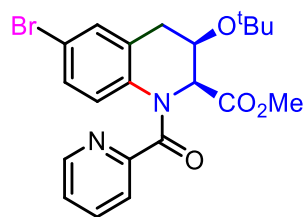

4g

**methyl (2S,3R)-6-bromo-3-(tert-butoxy)-1-picolinoyl-1,2,3,4-tetrahydroquinoline-2-carboxylate (4g)**, 54.6 mg (0.2 mmol scale), 61%, light yellow oil, *R<sub>f</sub>* = 0.40 (PE/EtOAc = 1/1), [α]<sub>D</sub><sup>25</sup> = -128.62 (c 0.374, CHCl<sub>3</sub>).

<sup>1</sup>H NMR (600 MHz, CDCl<sub>3</sub>) δ 8.42 (s, 1H), 7.76 (t, *J* = 7.5 Hz, 1H), 7.63 (d, *J* = 7.5 Hz, 1H), 7.30 (dd, *J* = 12.6, 6.5 Hz, 2H), 7.23 – 7.21 (m, 1H), 6.99 (s, 1H), 6.44 (s, 1H), 5.17 (s, 1H), 4.58 (s, 1H), 3.74 (s, 3H), 3.02 (dd, *J* = 14.6, 6.1 Hz, 1H), 2.86 (d, *J* = 14.4 Hz, 1H), 1.15 (s, 9H).

<sup>13</sup>C NMR (151 MHz, CDCl<sub>3</sub>) δ 169.2, 168.1, 153.2, 148.6, 137.2, 131.9, 131.6, 129.3, 126.1, 125.2, 124.6, 118.2, 75.1, 67.9, 62.5, 52.1, 34.6, 28.4.

HRMS (ESI): found: 447.0921 ([M+H]<sup>+</sup>), calcd. Chemical Formula: C<sub>21</sub>H<sub>24</sub>BrN<sub>2</sub>O<sub>4</sub>, Exact Mass: 447.0919.

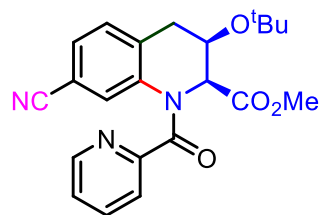

4h

**methyl (2S,3R)-3-(tert-butoxy)-7-cyano-1-picolinoyl-1,2,3,4-tetrahydroquinoline-2-carboxylate (4h)**, 44.1 mg (0.2 mmol scale), 56%, light yellow oil, *R<sub>f</sub>* = 0.40 (PE/EtOAc = 1/1), [α]<sub>D</sub><sup>25</sup> = -97.12 (c 0.214, CHCl<sub>3</sub>).

<sup>1</sup>H NMR (600 MHz, CDCl<sub>3</sub>) δ 8.35 (s, 1H), 7.85 (d, *J* = 7.5 Hz, 1H), 7.81 (d, *J* = 7.6 Hz, 1H), 7.39 – 7.31 (m, 2H), 7.28 (d, *J* = 8.3 Hz, 1H), 6.92 (s, 1H), 5.23 (d, *J* = 6.6 Hz, 1H), 4.71 (s, 1H), 3.76 (s, 3H), 3.10 (dd, *J* = 14.8, 5.0 Hz, 1H), 2.96 (d, *J* = 14.8 Hz, 1H), 1.14 (s, 9H).

<sup>13</sup>C NMR (151 MHz, CDCl<sub>3</sub>) δ 168.9, 168.2, 152.4, 148.4, 139.1, 137.5, 135.6, 129.8, 128.4, 127.9, 125.7, 125.0, 118.6, 110.1, 75.3, 67.7, 62.9, 52.2, 35.2, 28.5.

HRMS (ESI): found: 394.1763 ([M+H]<sup>+</sup>), calcd. Chemical Formula: C<sub>22</sub>H<sub>24</sub>N<sub>3</sub>O<sub>4</sub>, Exact Mass: 394.1767.

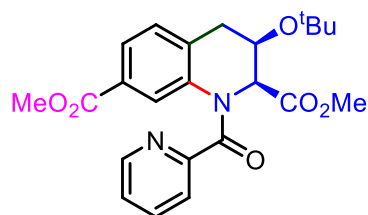

4i

**dimethyl (2S,3R)-3-(tert-butoxy)-1-picolinoyl-1,2,3,4-tetrahydroquinoline-2,6-dicarboxylate**

(4h), 49.5 mg (0.2 mmol scale), 58%, light yellow oil,  $R_f = 0.3$  (PE/EtOAc = 1/1),  $[\alpha]^{25}_D = -70.86$  (c 0.682, CHCl<sub>3</sub>).

<sup>1</sup>H NMR (600 MHz, CDCl<sub>3</sub>)  $\delta$  8.34 (s, 1H), 7.76 (t,  $J = 7.6$  Hz, 1H), 7.69 (d,  $J = 7.9$  Hz, 2H), 7.34 – 7.11 (m, 3H), 5.22 (d,  $J = 6.6$  Hz, 1H), 4.63 (s, 1H), 3.73 (s, 6H), 3.11 (dd,  $J = 14.7, 5.9$  Hz, 1H), 2.92 (d,  $J = 14.7$  Hz, 1H), 1.13 (s, 9H).

<sup>13</sup>C NMR (151 MHz, CDCl<sub>3</sub>)  $\delta$  169.2 (s), 168.5, 166.5, 153.3, 148.5, 138.0, 137.0, 135.0, 128.9, 128.4, 126.0, 125.8, 125.00, 124.6, 75.0, 67.9, 62.55 (s), 52.01 (d,  $J = 8.5$  Hz), 34.94 (s), 28.42 (s).

HRMS (ESI): found: 427.1871 ([M+H]<sup>+</sup>), calcd. Chemical Formula: C<sub>23</sub>H<sub>27</sub>N<sub>2</sub>O<sub>6</sub>, Exact Mass: 427.1869.

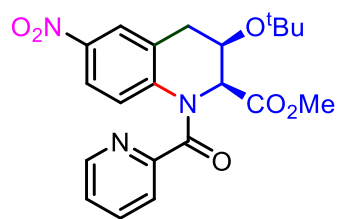

4j

**methyl (2S,3R)-3-(tert-butoxy)-6-nitro-1-picolinoyl-1,2,3,4-tetrahydroquinoline-2-carboxylate (4j)**, 51.3 mg (0.2 mmol scale), 62%, light yellow oil,  $R_f = 0.40$  (PE/EtOAc = 1/1),  $[\alpha]^{25}_D = -70.86$  (c 0.682, CHCl<sub>3</sub>).

<sup>1</sup>H NMR (600 MHz, CDCl<sub>3</sub>)  $\delta$  8.29 (s, 1H), 7.90 (d,  $J = 8.1$  Hz, 1H), 7.84 (d,  $J = 3.4$  Hz, 2H), 7.47 (s, 1H), 7.33 – 7.26 (m, 2H), 5.24 (d,  $J = 6.7$  Hz, 1H), 4.73 (s, 1H), 3.75 (s, 3H), 1.13 (s, 9H).

<sup>13</sup>C NMR (151 MHz, CDCl<sub>3</sub>)  $\delta$  168.9, 168.3, 152.4, 148.4, 146.4, 139.0, 137.5, 137.3, 129.4, 125.7, 125.0, 119.6, 75.3, 67.6, 62.8, 52.2, 35.1, 28.4.

HRMS (ESI): found: 414.1665 ([M+H]<sup>+</sup>), calcd. Chemical Formula: C<sub>21</sub>H<sub>24</sub>N<sub>3</sub>O<sub>6</sub>, Exact Mass: 414.1665.

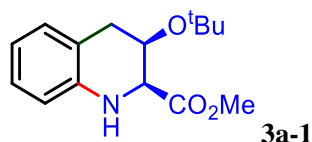

3a-1

**methyl (2S,3R)-3-(tert-butoxy)-1,2,3,4-tetrahydroquinoline-2-carboxylate (3a-1)**, 39.5 mg (0.2 mmol scale), 75%, light yellow oil,  $R_f = 0.6$  (PE/EtOAc = 3/1),  $[\alpha]^{25}_D = -18.26$  (c 0.614, CHCl<sub>3</sub>).

<sup>1</sup>H NMR (600 MHz, Chloroform-*d*)  $\delta$  7.01 (d,  $J = 7.8$  Hz, 1H), 6.95 (d,  $J = 7.4$  Hz, 1H), 6.68 (t,  $J = 7.3$  Hz, 1H), 6.62 (d,  $J = 8.0$  Hz, 1H), 4.32 (q,  $J = 4.2$  Hz, 1H), 4.06 (d,  $J = 3.1$  Hz, 1H), 3.77 (s, 3H), 2.94 (td,  $J = 17.6, 16.9, 4.5$  Hz, 2H), 1.17 (s, 9H).

<sup>13</sup>C NMR (151 MHz, Chloroform-*d*)  $\delta$  172.1, 142.4, 129.8, 127.0, 119.3, 118.1, 114.8, 74.3, 64.2, 59.1, 52.1, 34.5, 28.6.

HRMS (ESI): found: 264.1605 ([M+H]<sup>+</sup>), calcd. Chemical Formula: C<sub>15</sub>H<sub>22</sub>NO<sub>3</sub>, Exact Mass: 264.1600.

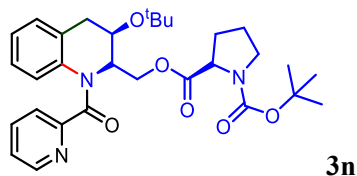

**2-(((2*S*,3*R*)-3-(tert-butoxy)-1-picolinoyl-1,2,3,4-tetrahydroquinolin-2-yl)methyl) 1-(tert-butyl) (*S*)-pyrrolidine-1,2-dicarboxylate (3n)**, 58.1 mg (0.2 mmol scale), 54%, light yellow oil, *R*<sub>f</sub> = 0.34 (PE/EtOAc = 1/1), [α]<sup>25</sup><sub>D</sub> = 38.26 (c 0.275, CHCl<sub>3</sub>).

<sup>1</sup>H NMR (600 MHz, CDCl<sub>3</sub>) δ 8.47 (d, *J* = 18.9 Hz, 1H), 7.76 (s, 1H), 7.58 (d, *J* = 5.9 Hz, 1H), 7.29 (s, 1H), 7.27 – 7.26 (m, 1H), 7.12 (d, *J* = 7.0 Hz, 1H), 7.01 (s, 1H), 6.88 (s, 1H), 4.46 (dd, *J* = 83.8, 10.2 Hz, 1H), 4.33 – 4.15 (m, 2H), 4.14 – 4.00 (m, 1H), 3.53 – 3.28 (m, 2H), 3.19 (td, *J* = 16.9, 7.4 Hz, 1H), 2.72 (dt, *J* = 26.8, 13.4 Hz, 1H), 2.19 (dd, *J* = 19.2, 10.3 Hz, 1H), 1.99 (s, 1H), 1.93 – 1.79 (m, 2H), 1.43 (s, 3H), 1.33 (s, 6H), 1.22 (d, *J* = 17.9 Hz, 9H).

<sup>13</sup>C NMR (151 MHz, CDCl<sub>3</sub>) δ 173.1, 172.7, 168.3, 154.7, 154.5, 153.8, 148.8, 148.7, 136.9, 129.3, 129.3, 129.0, 128.5, 126.0, 125.6, 125.0, 124.6, 124.5, 123.9, 79.9, 79.8, 74.9, 74.8, 65.5, 60.8, 59.4, 58.9, 46.6, 46.4, 34.1, 30.8, 30.0, 28.6, 28.4, 28.4, 28.4, 24.4, 23.8.

HRMS (ESI): found: 538.2913 ([M+H]<sup>+</sup>), calcd. Chemical Formula: C<sub>30</sub>H<sub>40</sub>N<sub>3</sub>O<sub>6</sub>, Exact Mass: 538.2917.

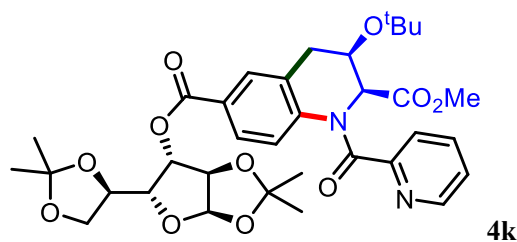

**6-(((3*aR*,5*R*,6*S*,6*aR*)-5-((*R*)-2,2-dimethyl-1,3-dioxolan-4-yl)-2,2-dimethyltetrahydrofuro[2,3-*d*][1,3]dioxol-6-yl) 2-methyl (2*S*,3*R*)-3-(tert-butoxy)-1-picolinoyl-1,2,3,4-tetrahydroquinoline-2,6-dicarboxylate (4k)**, 70.7 mg (0.2 mmol scale), 54%, light yellow oil, *R*<sub>f</sub> = 0.41 (PE/EtOAc = 1/1), [α]<sup>25</sup><sub>D</sub> = -28.62 (c 0.476, CHCl<sub>3</sub>).

<sup>1</sup>H NMR (600 MHz, Chloroform-*d*) δ 8.34 (s, 1H), 7.73 (dd, *J* = 23.8, 7.5 Hz, 3H), 7.26 (s, 2H), 7.23 (d, *J* = 7.6 Hz, 1H), 5.84 (s, 1H), 5.37 (s, 1H), 5.21 (s, 1H), 4.64 (s, 1H), 4.46 (s, 1H), 4.22 (s, 1H), 3.95 (d, *J* = 20.6 Hz, 3H), 3.74 (s, 3H), 3.12 (d, *J* = 14.4 Hz, 1H), 2.92 (d, *J* = 14.7 Hz, 1H), 1.51 (s, 3H), 1.38 (s, 3H), 1.29 (s, 3H), 1.27 (s, 3H), 1.13 (s, 9H).

<sup>13</sup>C NMR (151 MHz, Chloroform-*d*) δ 169.2, 148.6, 138.4, 137.0, 135.7, 129.1, 127.9, 126.4, 125.6, 125.2, 124.6, 112.4, 109.4, 105.1, 83.4, 79.9, 76.4, 75.2, 72.4, 68.0, 67.2, 62.7, 52.1, 35.1, 28.5, 27.0, 26.8, 26.3, 25.6.

HRMS (ESI): found: 655.2861 ([M+H]<sup>+</sup>), calcd. Chemical Formula: C<sub>34</sub>H<sub>43</sub>N<sub>2</sub>O<sub>11</sub>, Exact Mass: 655.2867.

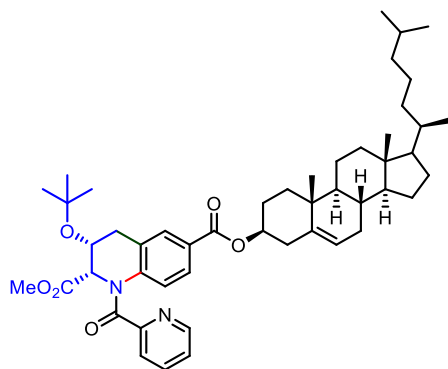

4l

**6-((3*S*,8*S*,9*S*,10*R*,13*R*,14*S*)-10,13-dimethyl-17-((*R*)-6-methylheptan-2-yl)-2,3,4,7,8,9,10,11,12,13,14,15,16,17-tetradecahydro-1*H*-cyclopenta[*a*]phenanthren-3-yl) 2-methyl (2*S*,3*R*)-3-(tert-butoxy)-1-picolinoyl-1,2,3,4-tetrahydroquinoline-2,6-dicarboxylate (4l)**, 101.5 mg (0.2 mmol scale), 65%, light yellow oil,  $R_f = 0.51$  (PE/EtOAc = 1/1),  $[\alpha]^{25}_D = -33.4$  (c 0.374, CHCl<sub>3</sub>).

<sup>1</sup>H NMR (600 MHz, Chloroform-*d*)  $\delta$  8.36 (s, 1H), 7.76 – 7.72 (m, 1H), 7.68 (d,  $J = 7.8$  Hz, 1H), 7.65 (d,  $J = 7.7$  Hz, 1H), 7.24 (s, 2H), 7.19 (d,  $J = 7.8$  Hz, 1H), 5.37 (d,  $J = 4.7$  Hz, 1H), 5.22 (d,  $J = 6.8$  Hz, 1H), 4.65 (ddd,  $J = 24.9, 12.3, 6.7$  Hz, 2H), 3.75 (s, 3H), 3.12 (dd,  $J = 14.8, 6.3$  Hz, 1H), 2.91 (dd,  $J = 14.8, 2.6$  Hz, 1H), 2.33 – 2.24 (m, 2H), 2.02 (d,  $J = 12.3$  Hz, 1H), 1.97 (d,  $J = 16.5$  Hz, 1H), 1.86 (d,  $J = 13.2$  Hz, 2H), 1.76 (d,  $J = 12.7$  Hz, 1H), 1.55 – 1.44 (m, 6H), 1.34 (d,  $J = 7.8$  Hz, 2H), 1.29 (d,  $J = 3.5$  Hz, 1H), 1.25 (s, 3H), 1.14 (s, 10H), 1.13 – 1.11 (m, 2H), 1.09 (d,  $J = 9.8$  Hz, 3H), 1.04 (s, 3H), 1.02 – 0.94 (m, 3H), 0.92 (d,  $J = 6.5$  Hz, 3H), 0.87 (d,  $J = 2.7$  Hz, 3H), 0.86 (d,  $J = 2.7$  Hz, 3H), 0.69 (s, 3H).

<sup>13</sup>C NMR (151 MHz, Chloroform-*d*)  $\delta$  169.3, 168.7, 165.3, 153.6, 148.8, 139.7, 137.8, 136.9, 129.1, 128.8, 126.0, 125.7, 125.0, 124.4, 122.9, 75.1, 74.4, 67.9, 62.4, 56.8, 56.3, 52.1, 50.1, 42.5, 39.9, 39.7, 38.2, 37.1, 36.7, 36.3, 35.9, 35.0, 32.04, 32.00, 29.8, 28.5, 28.4, 28.2, 27.9, 24.4, 24.0, 23.0, 22.7, 21.2, 19.5, 18.9, 12.0.

HRMS (ESI): found: 781.5159 ( $[M+H]^+$ ), calcd. Chemical Formula: C<sub>49</sub>H<sub>69</sub>N<sub>2</sub>O<sub>6</sub>, Exact Mass: 781.5156.

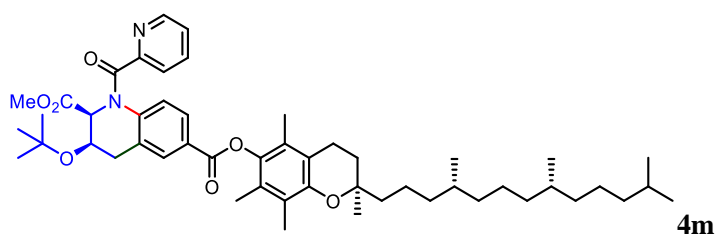

4m

**2-methyl 6-((*R*)-2,5,7,8-tetramethyl-2-((4*R*,8*R*)-4,8,12-trimethyltridecyl)chroman-6-yl) (2*S*,3*R*)-3-(tert-butoxy)-1-picolinoyl-1,2,3,4-tetrahydroquinoline-2,6-dicarboxylate (4m)**, 92.4 mg (1.252 mmol scale), 56%, light yellow oil,  $R_f = 0.46$  (PE/EtOAc = 1/1),  $[\alpha]^{25}_D = -68.26$  (c 0.576, CHCl<sub>3</sub>).

<sup>1</sup>H NMR (600 MHz, Chloroform-*d*)  $\delta$  8.32 (d,  $J = 4.4$  Hz, 1H), 7.86 (d,  $J = 7.8$  Hz, 1H), 7.72 (d,  $J = 7.7$  Hz, 2H), 7.38 (s, 1H), 7.28 (d,  $J = 7.8$  Hz, 1H), 7.23 (t,  $J = 4.9$  Hz, 1H), 5.25 (d,  $J = 6.8$  Hz, 1H), 4.65 (s, 1H), 3.77 (s, 3H), 3.18 (dd,  $J = 14.8, 6.3$  Hz, 1H), 2.96 (dd,  $J = 14.8, 2.6$  Hz, 1H), 2.60 – 2.54 (m, 2H), 2.07 (s, 3H), 1.88 (d,  $J = 19.8$  Hz, 3H), 1.77 (d,  $J = 11.1$  Hz, 5H), 1.58 – 1.49 (m, 3H), 1.41 (s, 4H), 1.26 (s, 7H), 1.23 (s, 4H), 1.18 (s, 9H), 1.13 (t,  $J = 4.4$  Hz, 3H), 1.06 (dd,  $J = 11.2, 6.1$  Hz, 3H), 0.86 (dd,  $J = 11.4, 6.6$  Hz, 12H).

$^{13}\text{C}$  NMR (151 MHz, Chloroform-*d*)  $\delta$  169.3, 168.7, 164.7, 153.4, 149.5, 148.5, 140.5, 138.2, 137.1, 135.4, 129.1, 127.8, 126.6, 126.0, 125.1, 124.7, 123.1, 117.5, 75.2, 67.9, 62.4, 52.1, 40.5, 39.5, 37.6, 37.4, 35.1, 32.94, 32.89, 31.3, 28.5, 28.1, 24.9, 24.6, 24.2, 23.9, 22.9, 22.8, 21.2, 20.7, 19.9, 19.8, 13.2, 12.4, 12.3, 12.0.

HRMS (ESI): found: 825.5414 ( $[\text{M}+\text{H}]^+$ ), calcd. Chemical Formula:  $\text{C}_{51}\text{H}_{73}\text{N}_2\text{O}_7$ , Exact Mass: 825.5418.

### VIII Ee value of selected starting materials and related products

Table S2 ee value of selected starting materials and related products

| Entry | Compound name | Structure                                                                           | ee   |
|-------|---------------|-------------------------------------------------------------------------------------|------|
| 1     | 1a            | 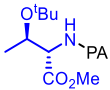   | >99% |
| 2     | 3a            |    | 98%  |
| 3     | 1a-R          |    | >99% |
| 4     | 3a-R          |   | 98%  |
| 5     | 1c-S          |  | >99% |
| 6     | 3c-S          |  | >99% |
| 7     | 1c-R          |  | >99% |
| 8     | 3c-R          |  | >99% |
| 9     | 1j-S          |  | 99%  |
| 10    | 3j-S          |  | 99%  |

## IX NMR spectra of substrates and products

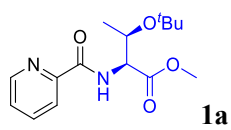

### 1a <sup>1</sup>H NMR

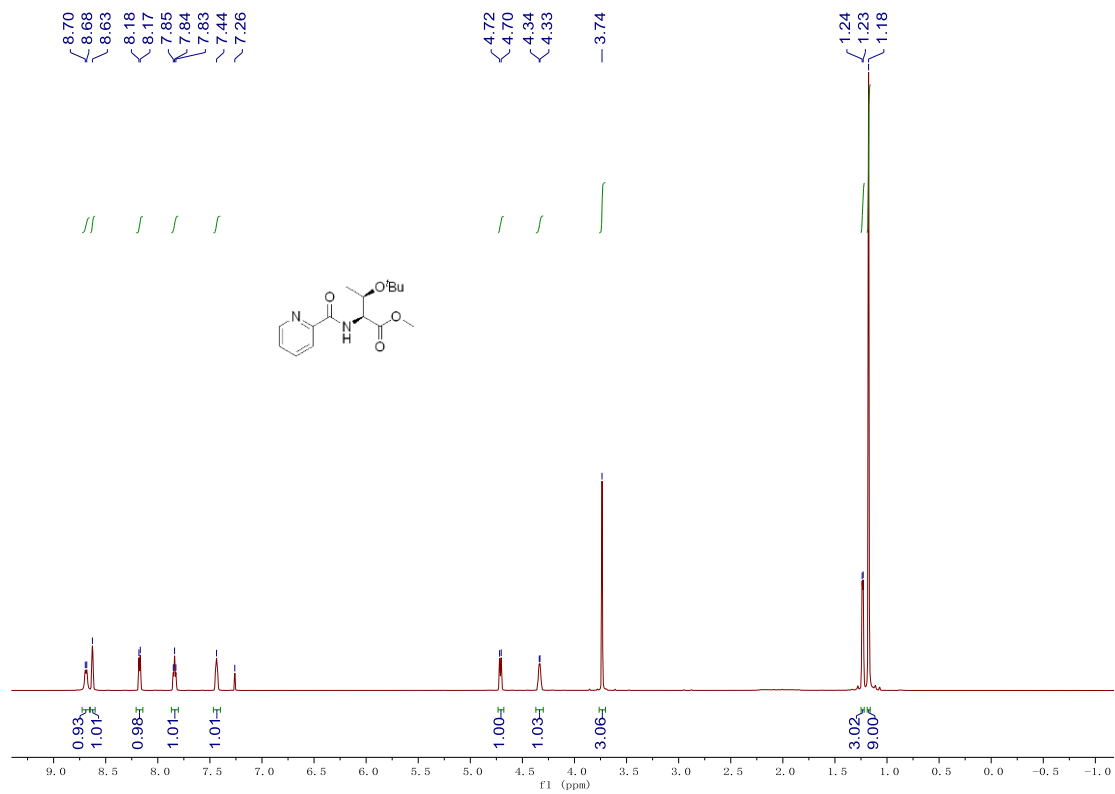

### 1a <sup>13</sup>C NMR



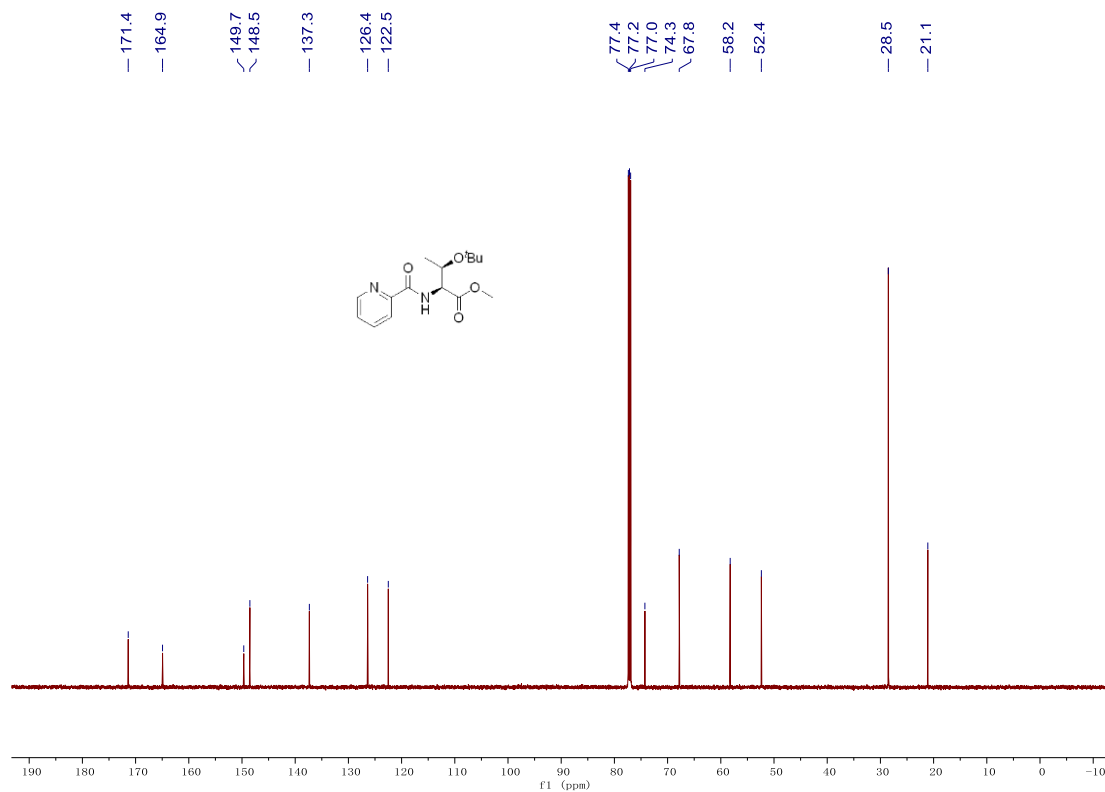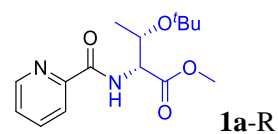

**1a-R <sup>1</sup>H NMR**

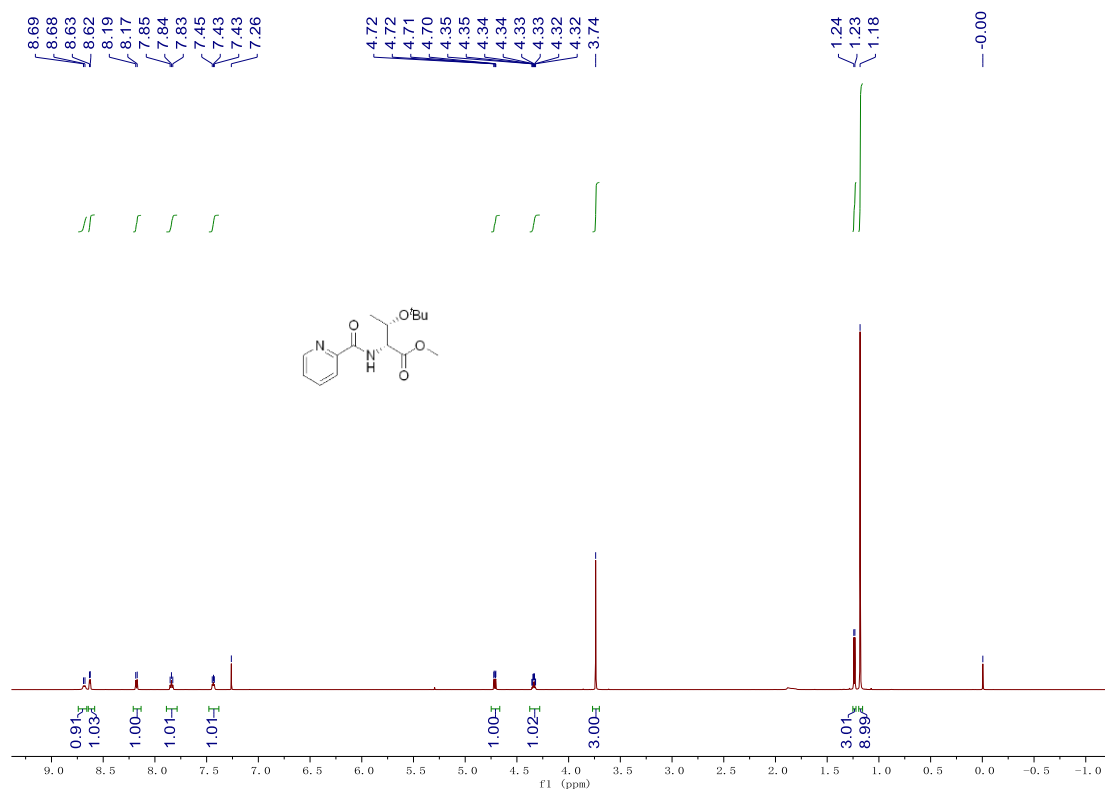

**1a-R <sup>13</sup>C NMR**

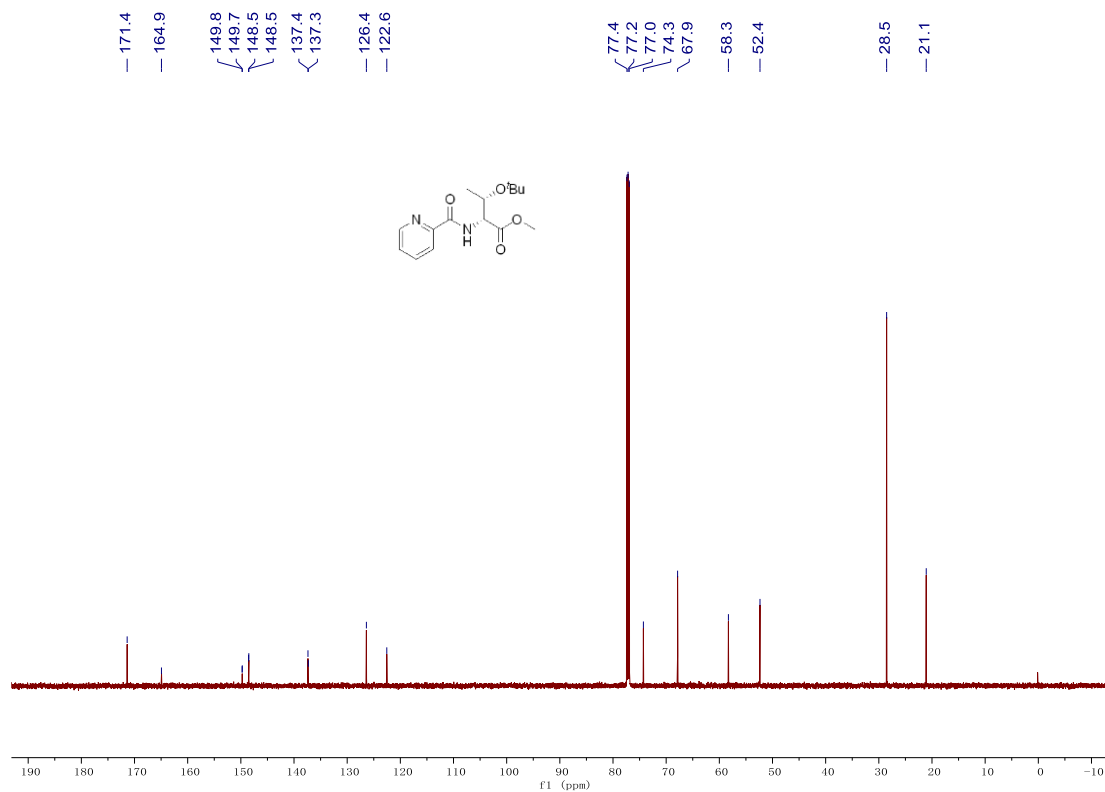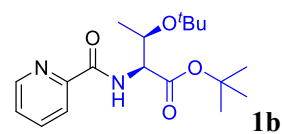

**1b**  $^1\text{H}$  NMR

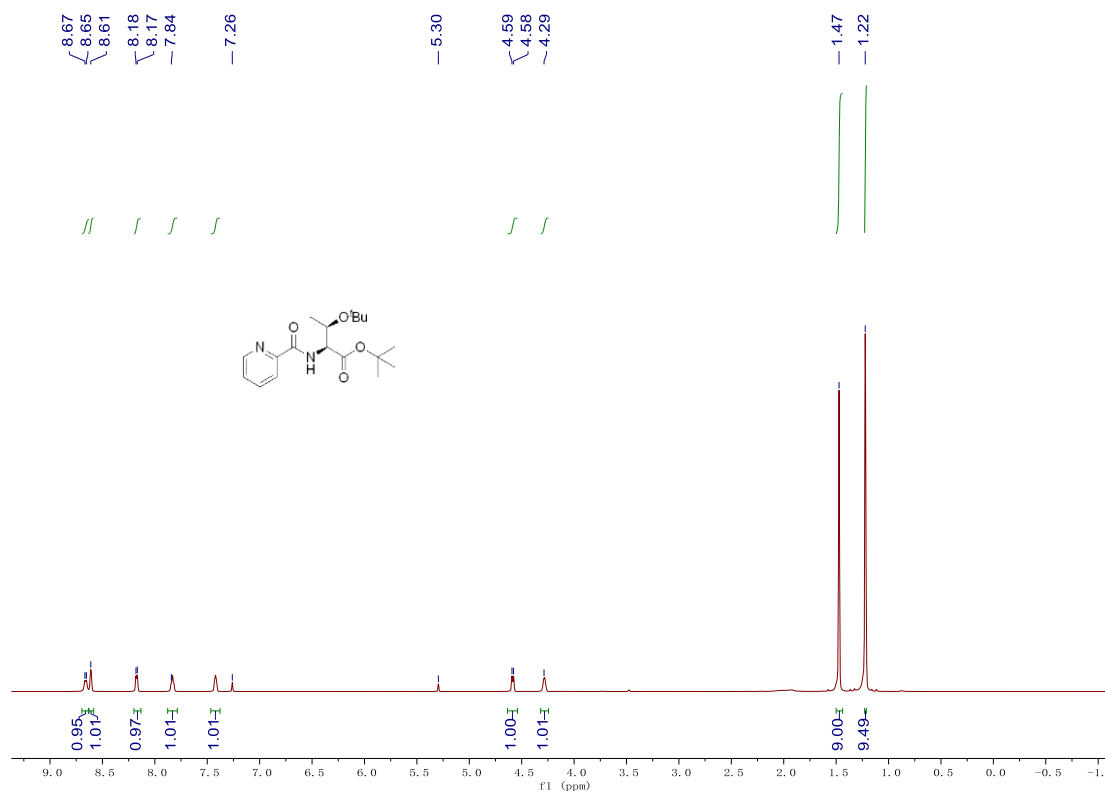

**1b**  $^{13}\text{C}$  NMR

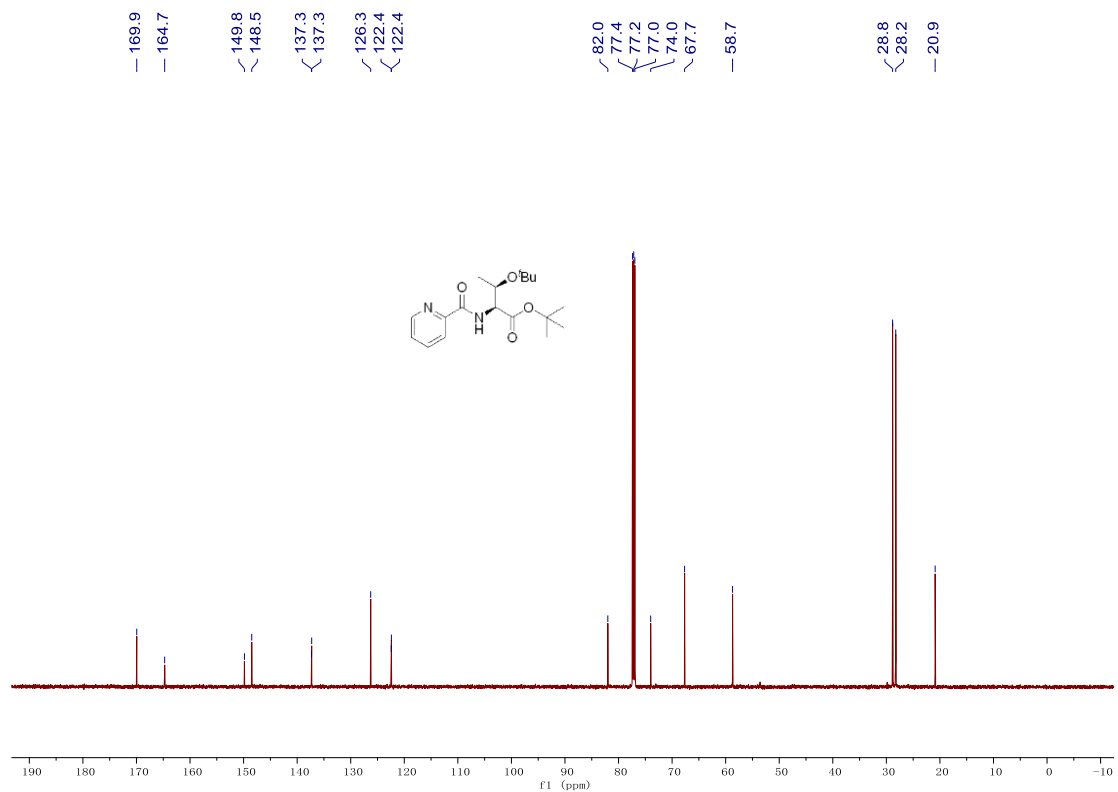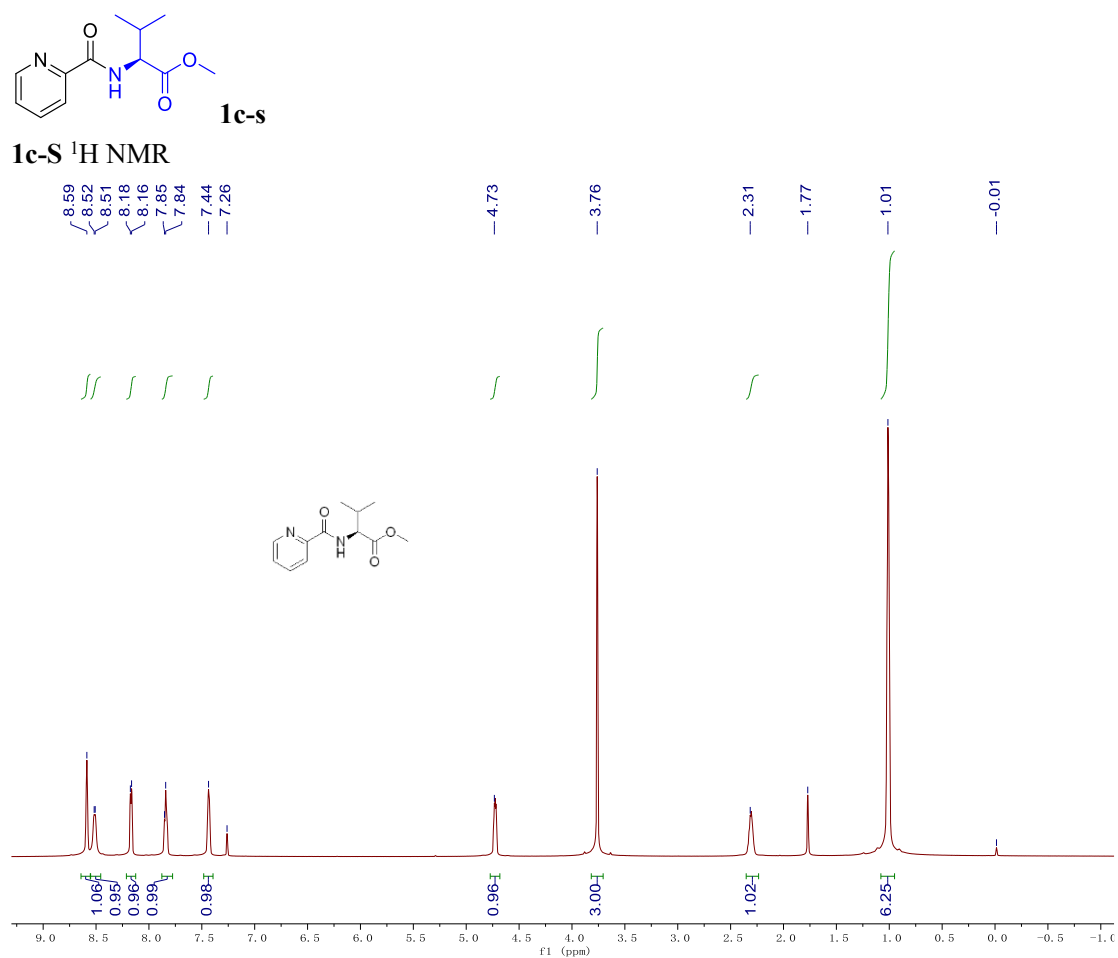

**1c-S  $^{13}\text{C}$  NMR**

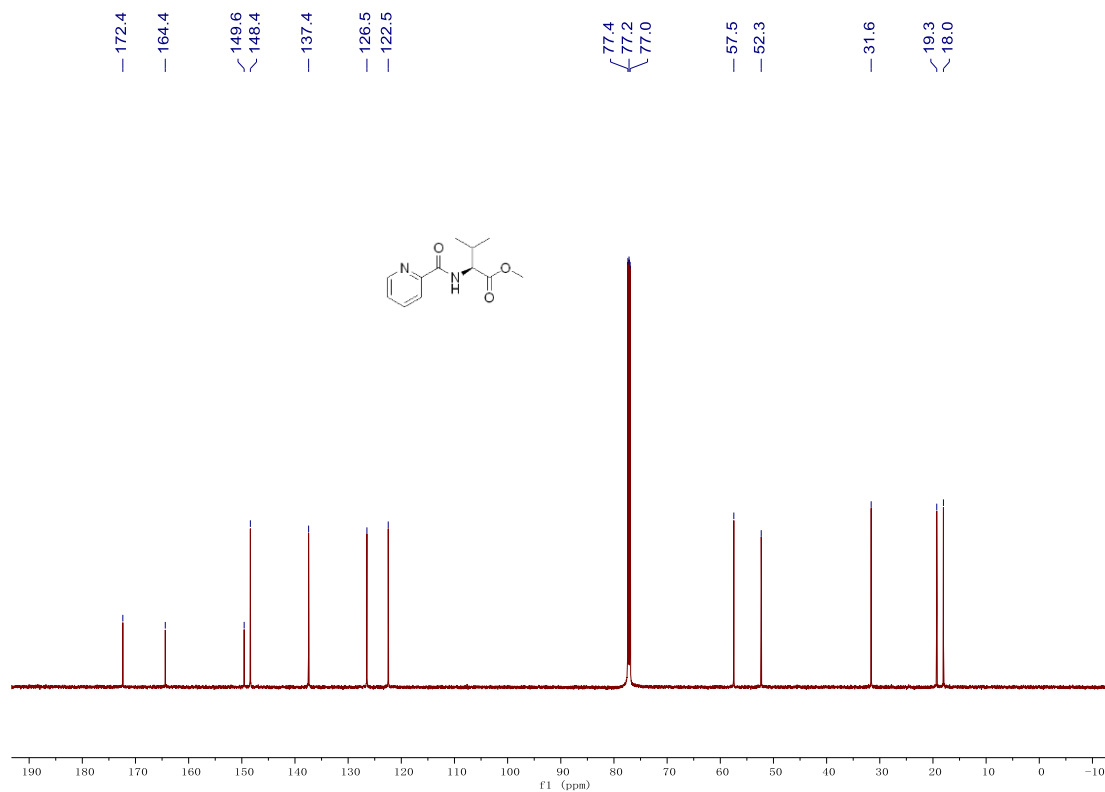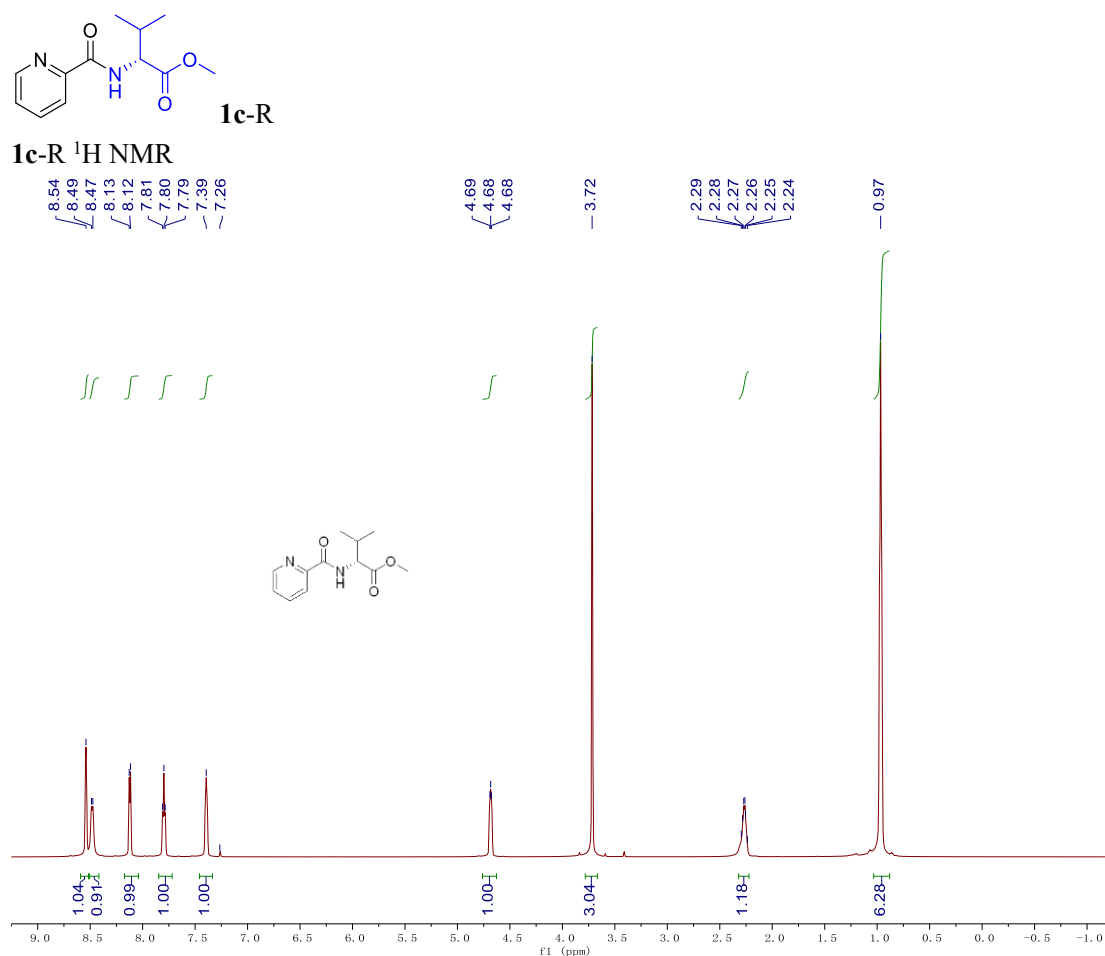

1c-R  $^{13}\text{C}$  NMR

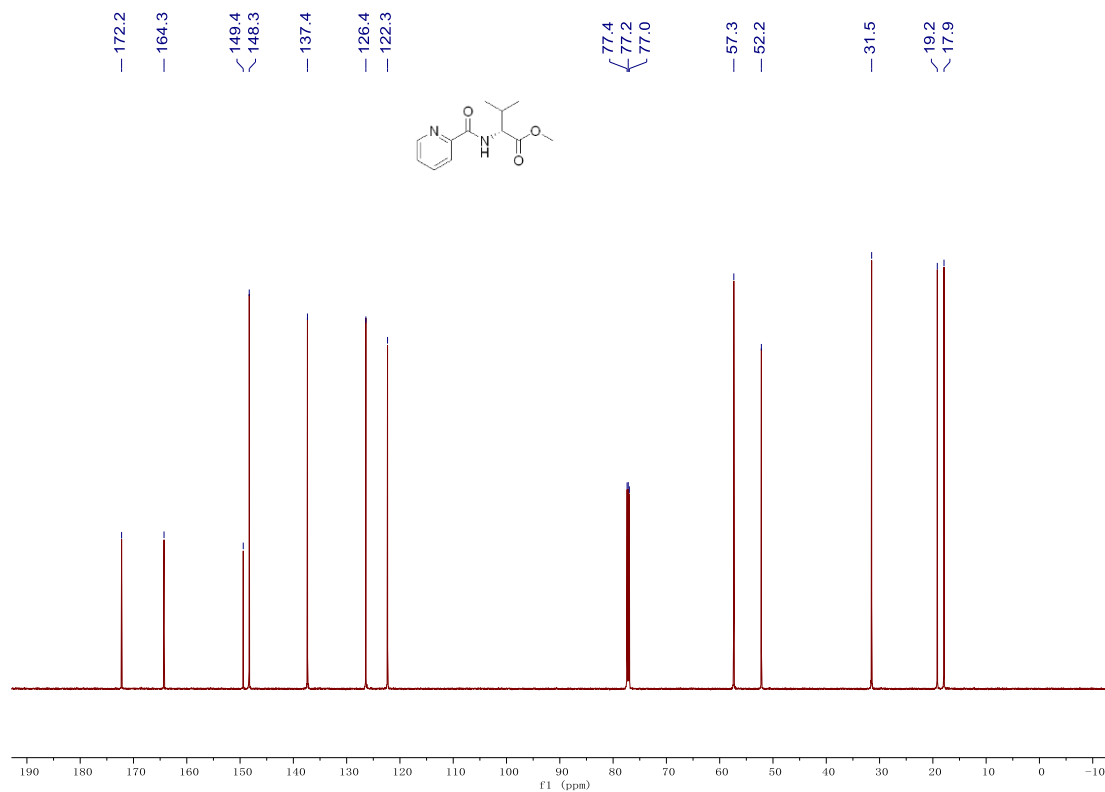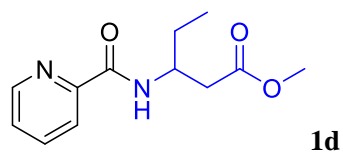

**1d** <sup>1</sup>H NMR

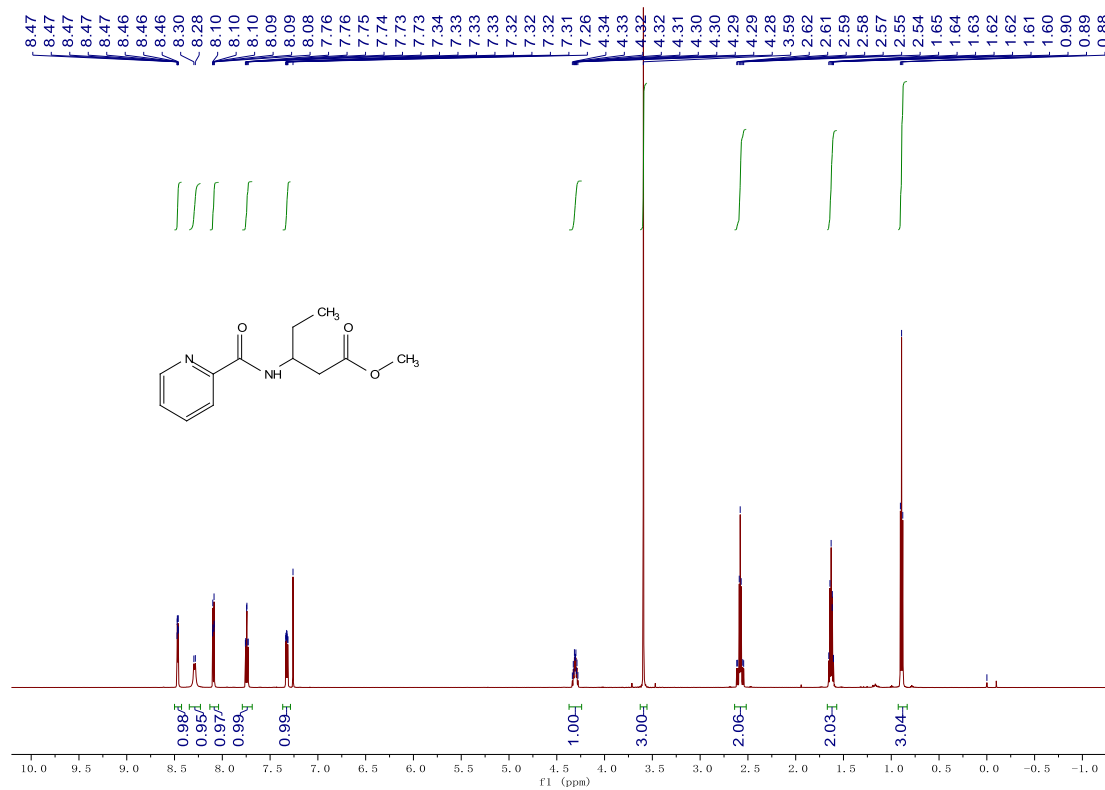

**1d** <sup>13</sup>C NMR

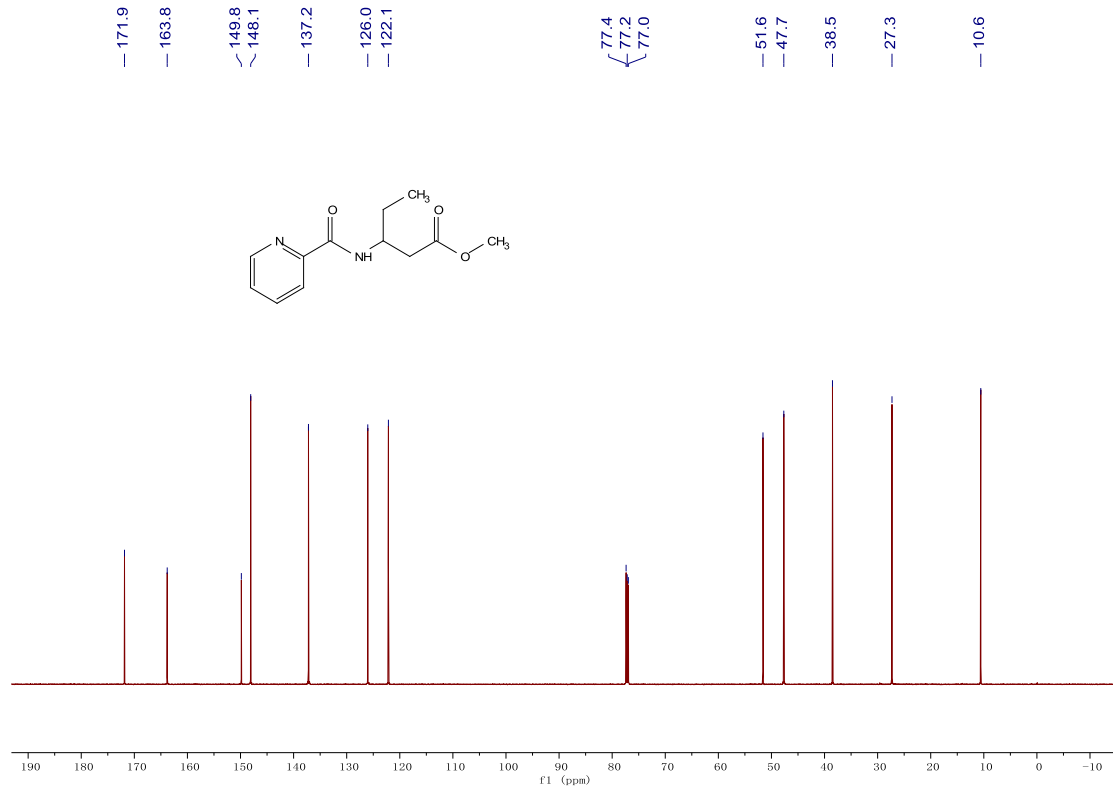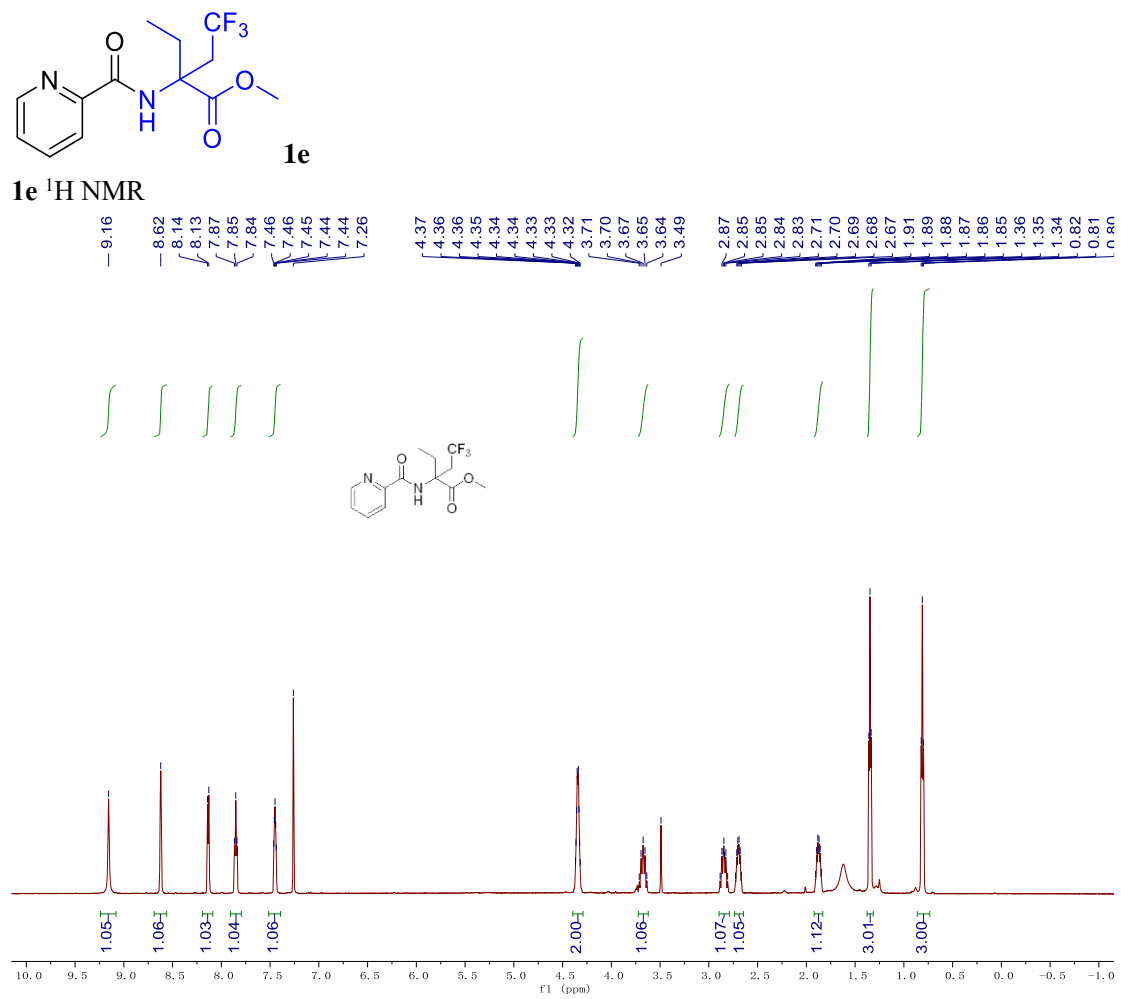

**1e** <sup>19</sup>F NMR

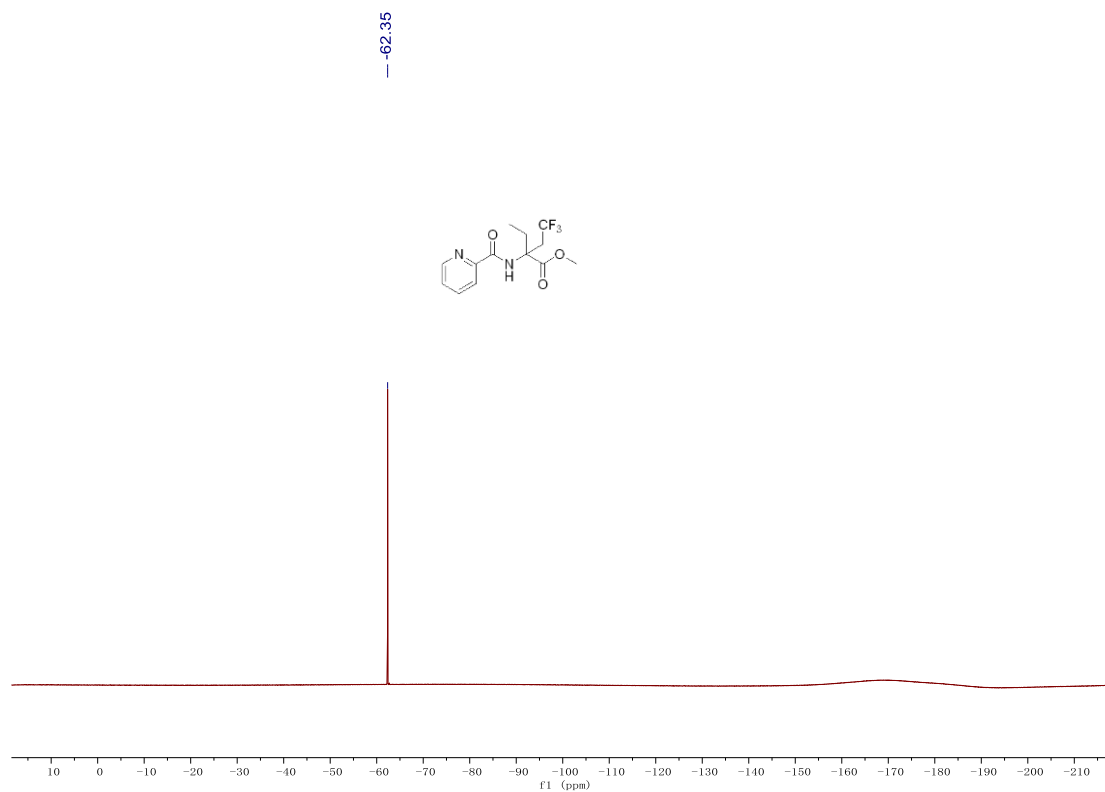

**1e**  $^{13}\text{C}$  NMR

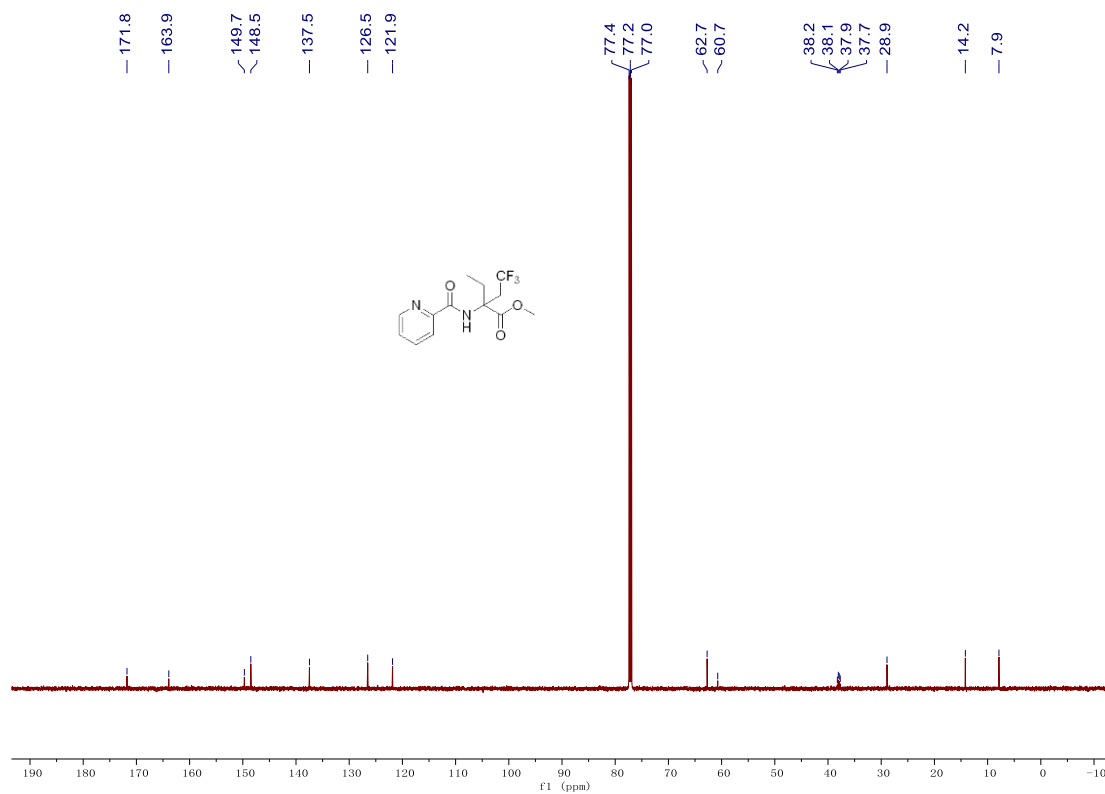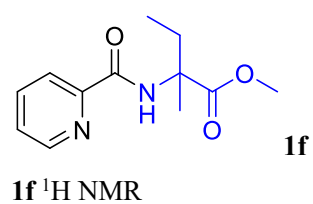

**1f**  $^1\text{H}$  NMR

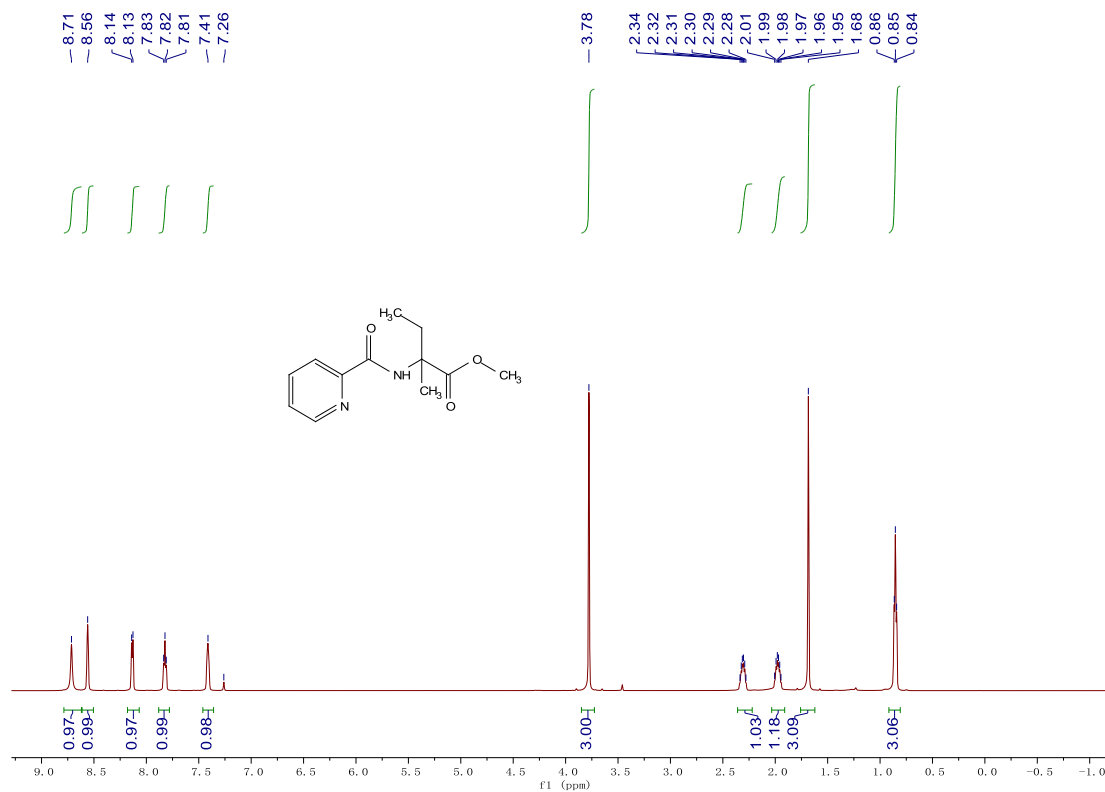

**1f <sup>13</sup>C NMR**

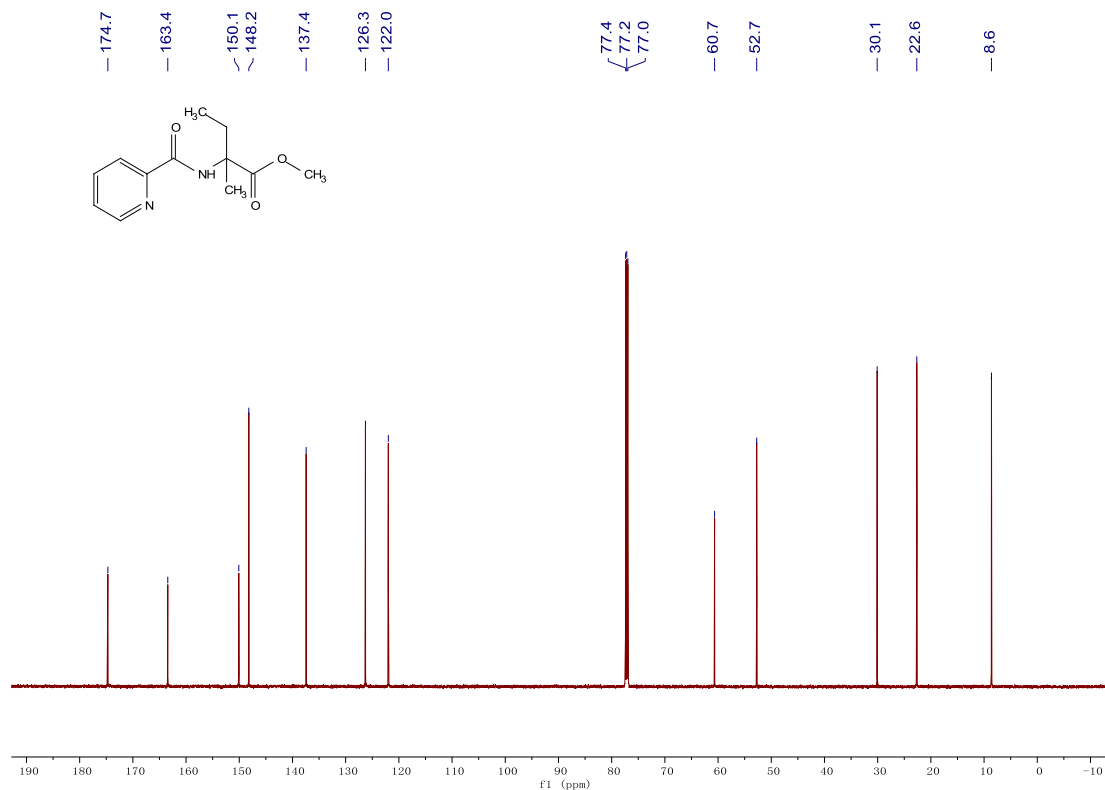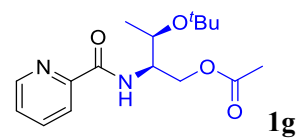

**1g <sup>1</sup>H NMR**



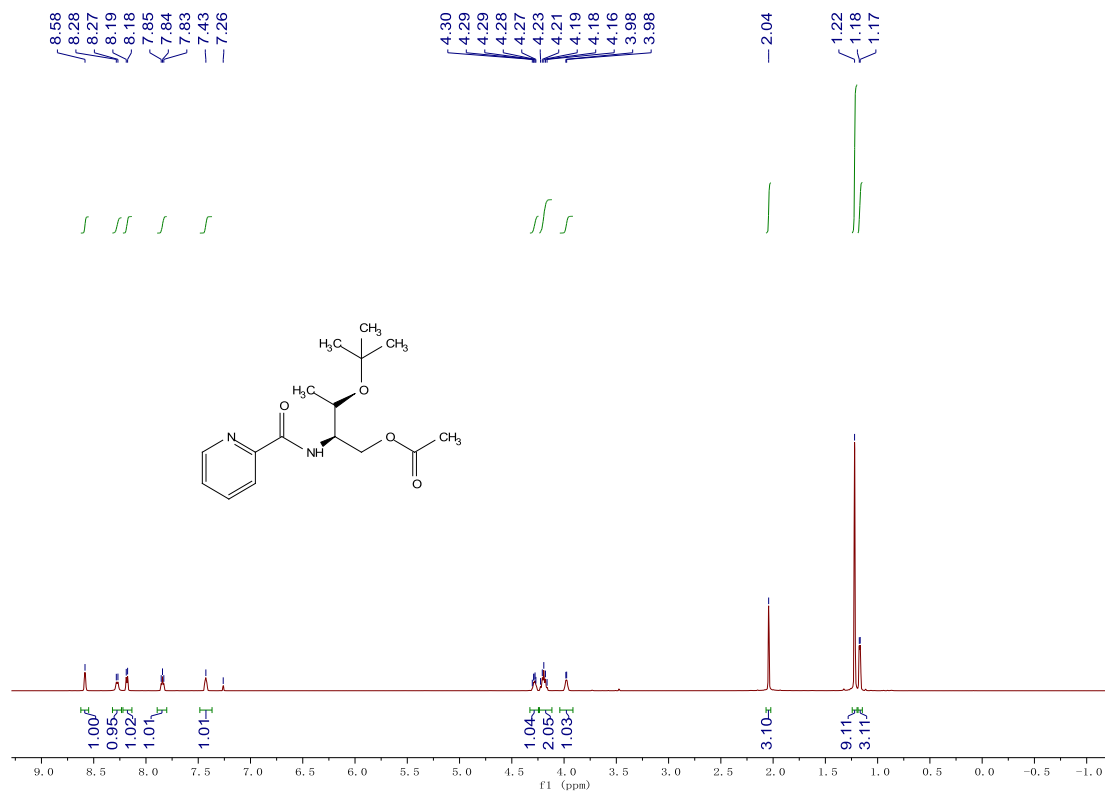

**1g**  $^{13}\text{C}$  NMR

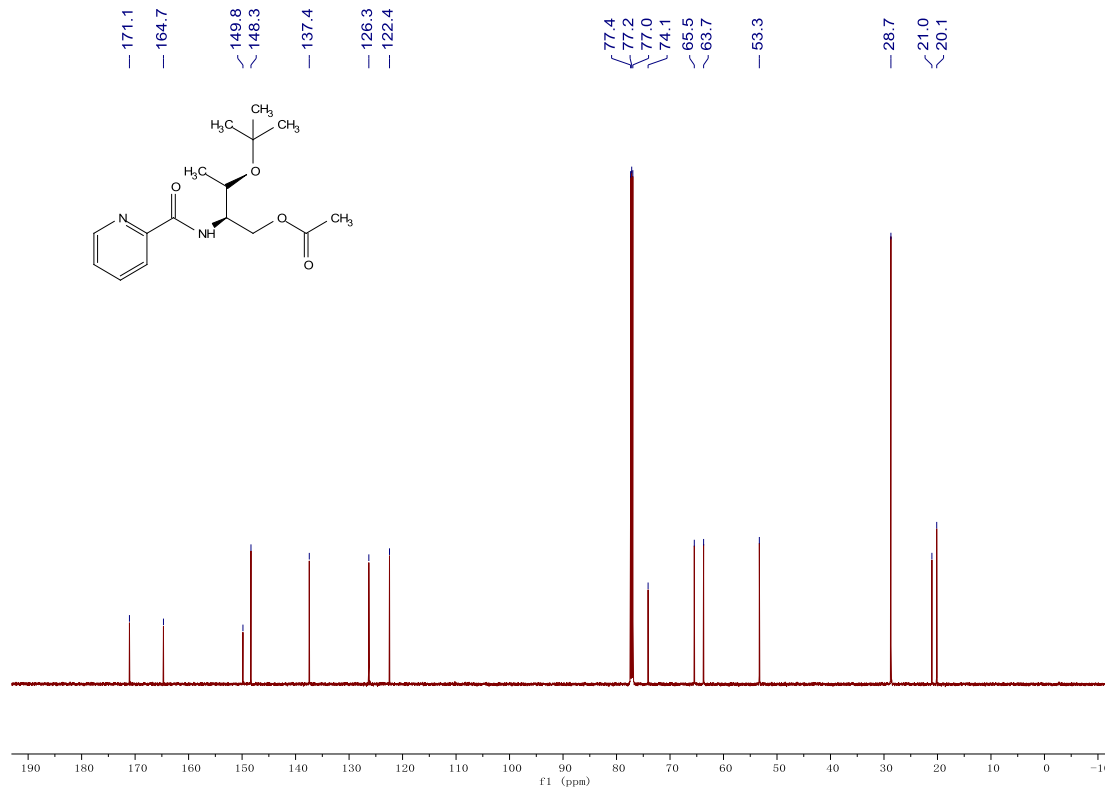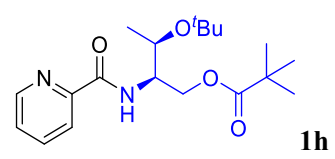

**1h**  $^1\text{H}$  NMR

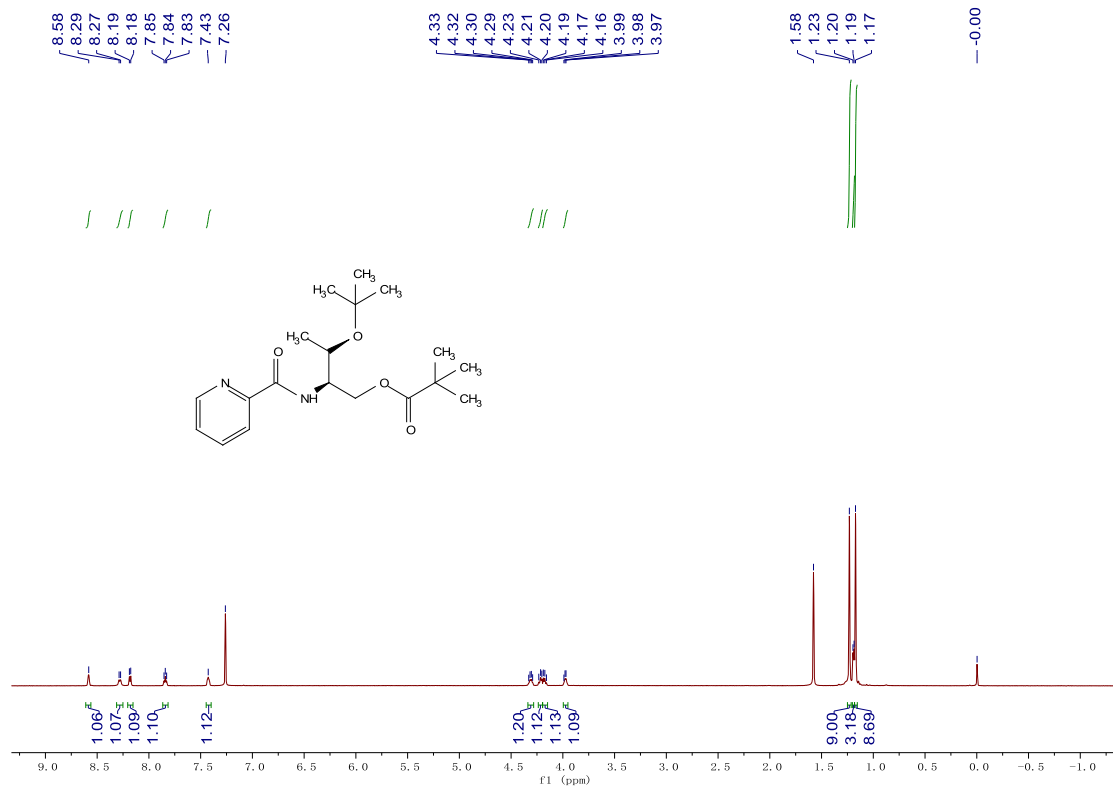

**<sup>13</sup>C NMR**

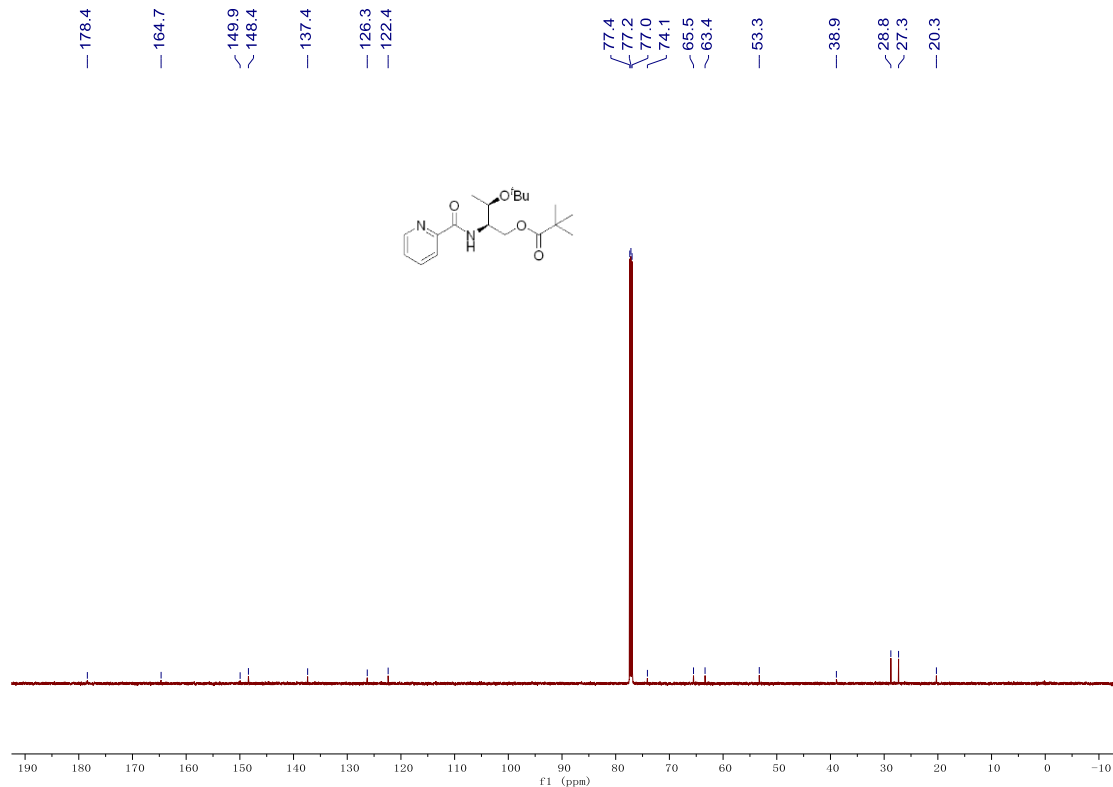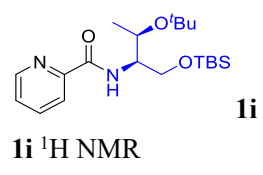

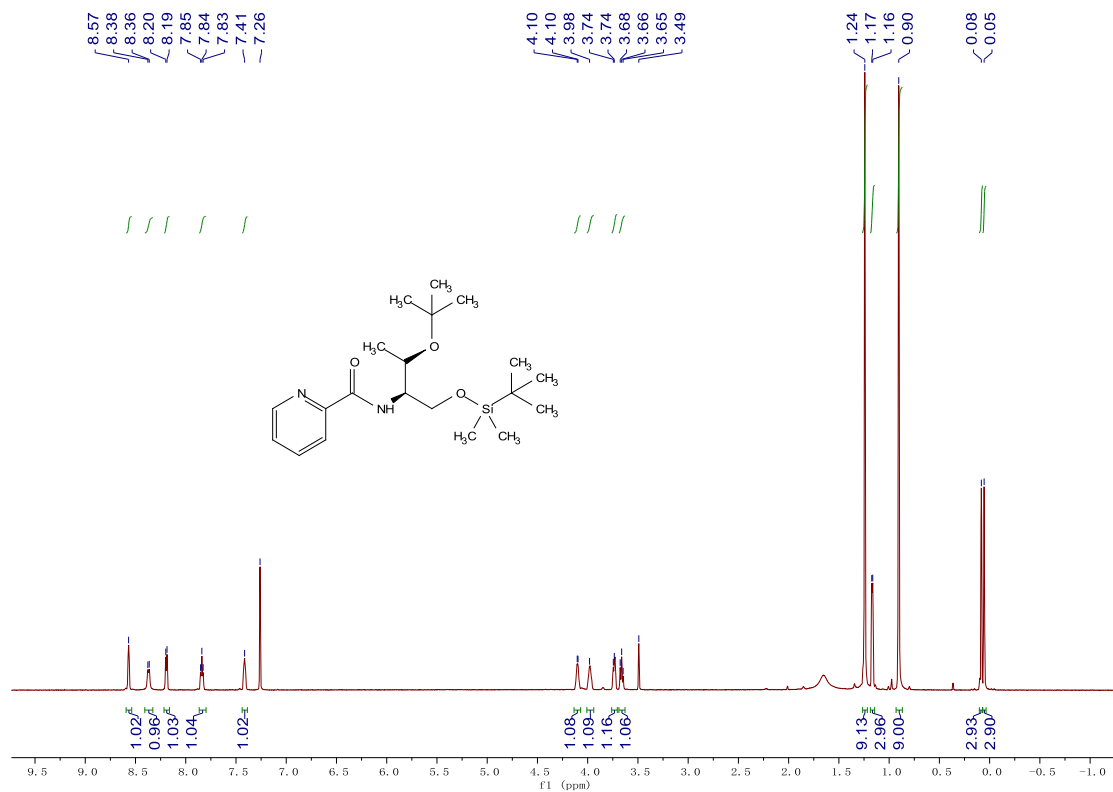

**1i <sup>13</sup>C NMR**

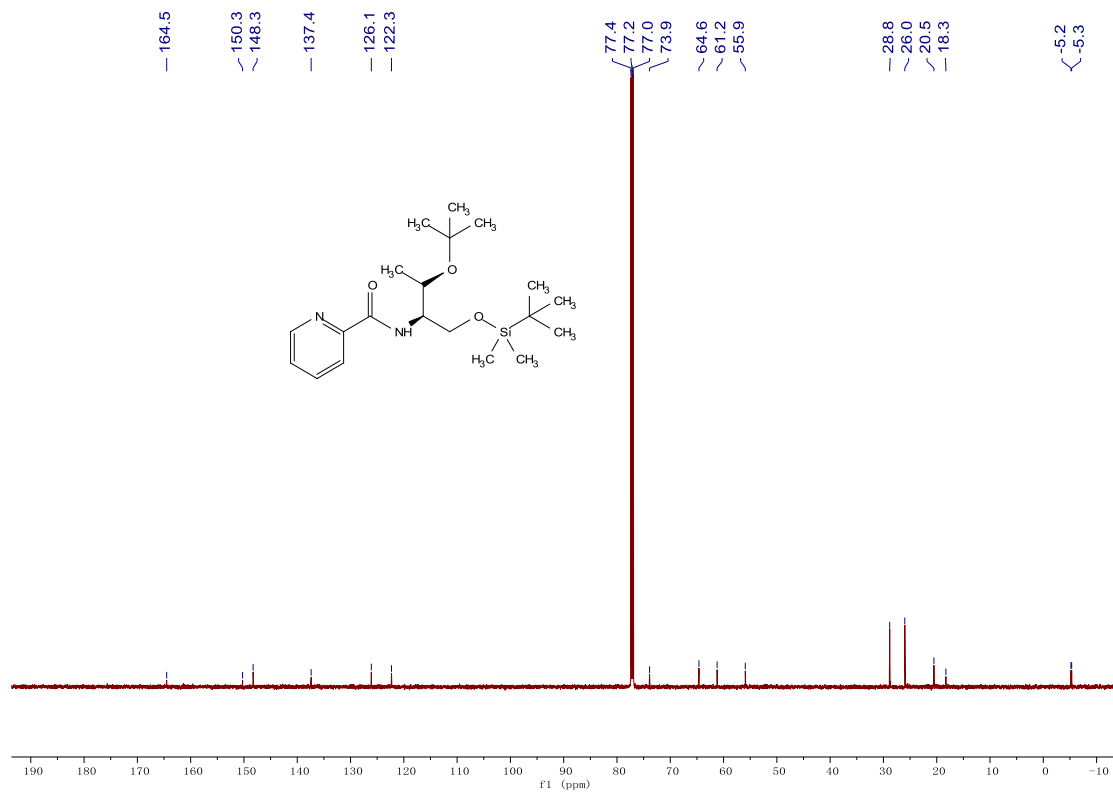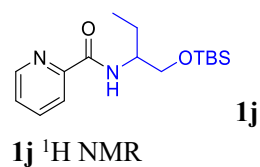

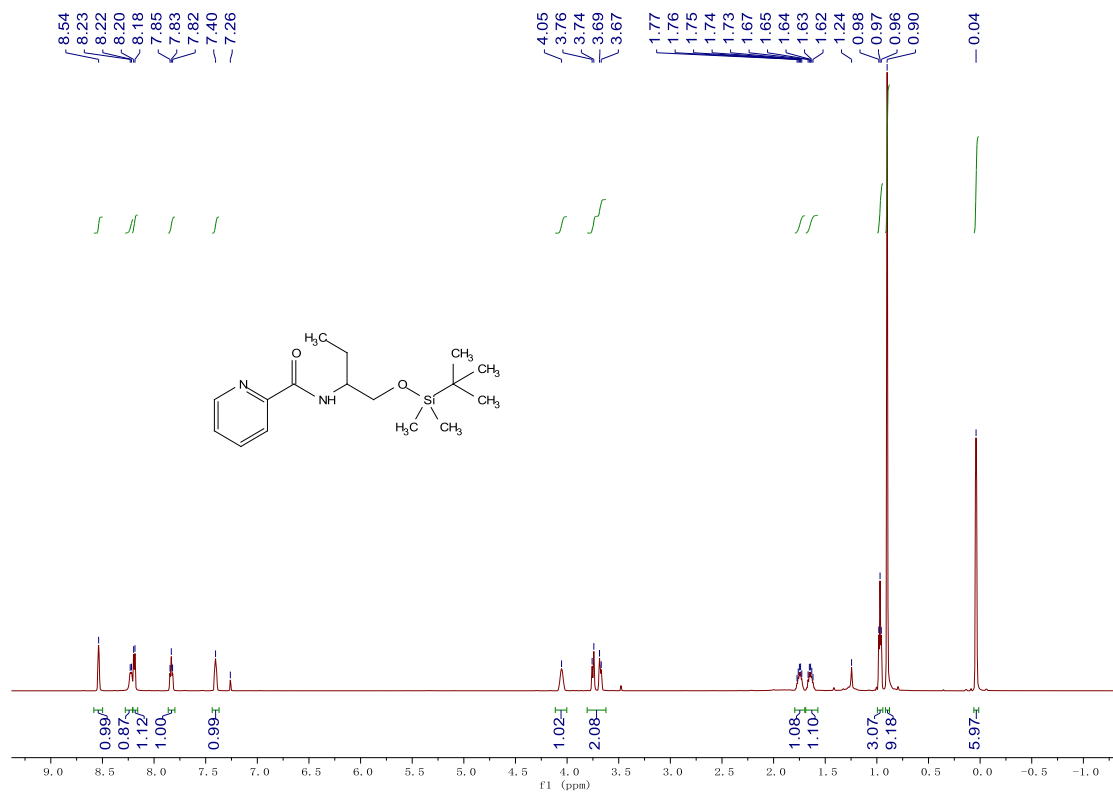

**1j** <sup>13</sup>C NMR

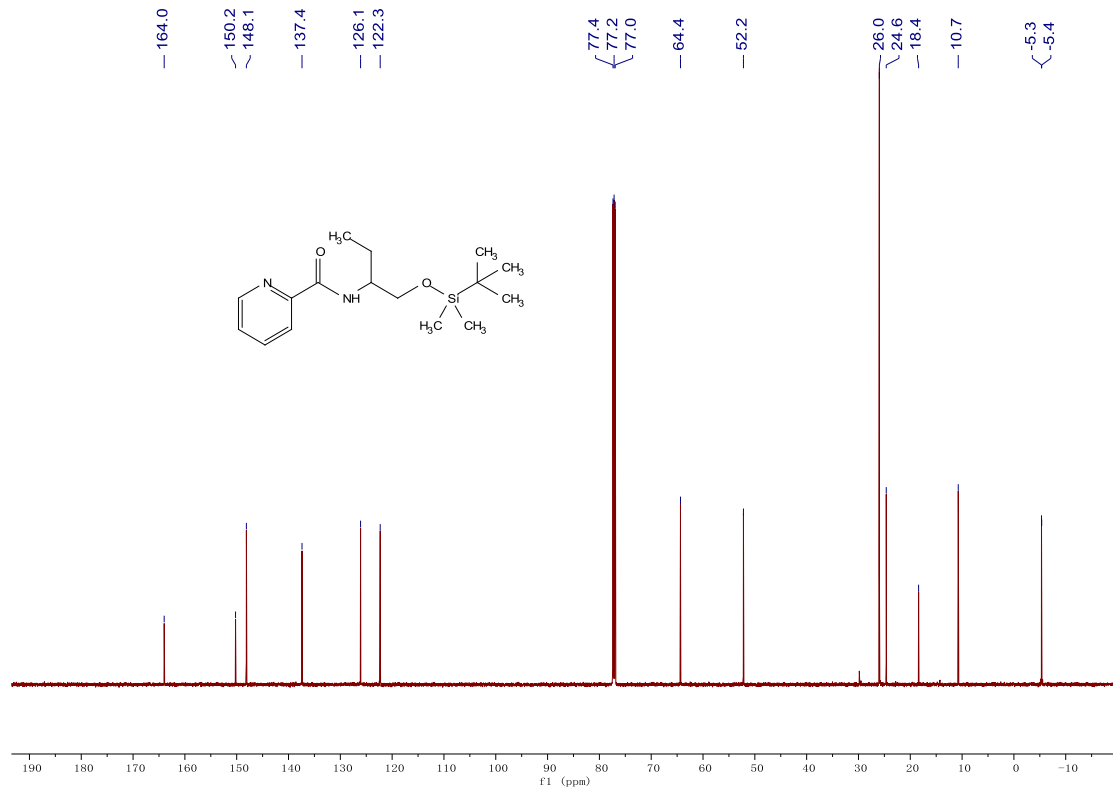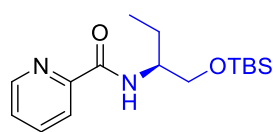

**1j-s**

**1j-s** <sup>1</sup>H NMR

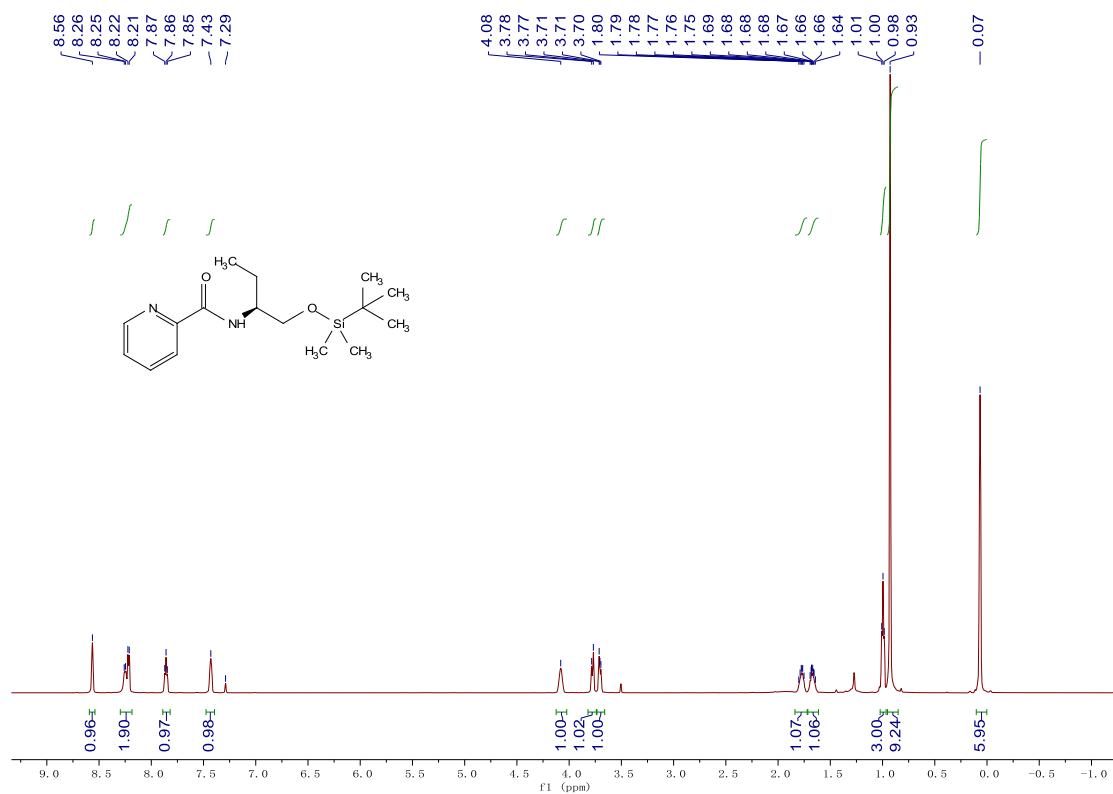

**1j-s <sup>13</sup>C NMR**

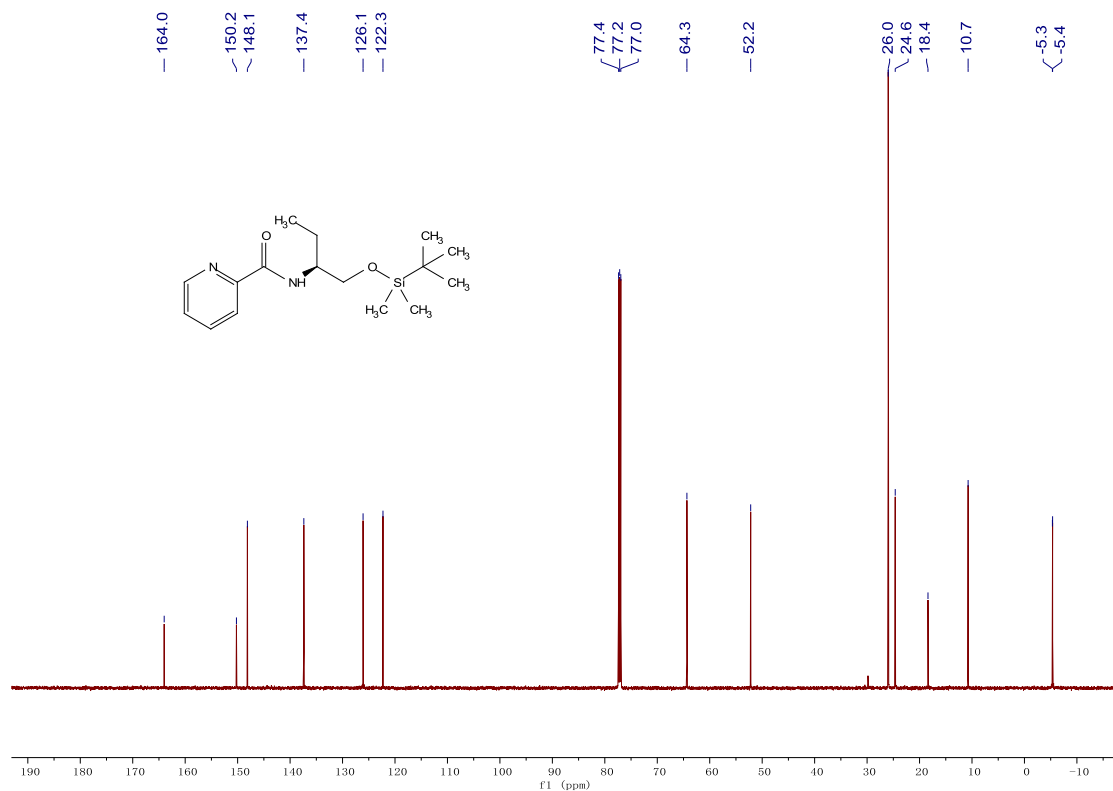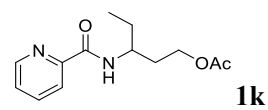

**1k <sup>1</sup>H NMR**

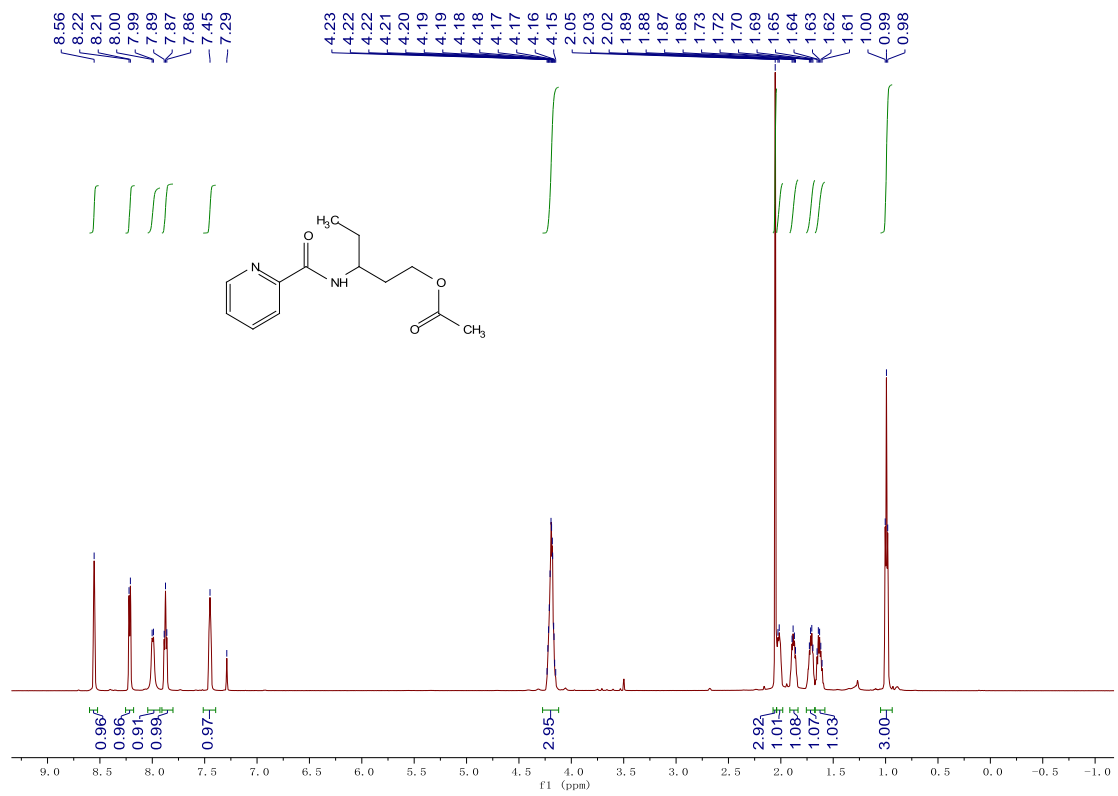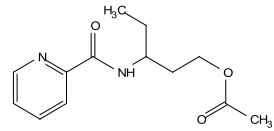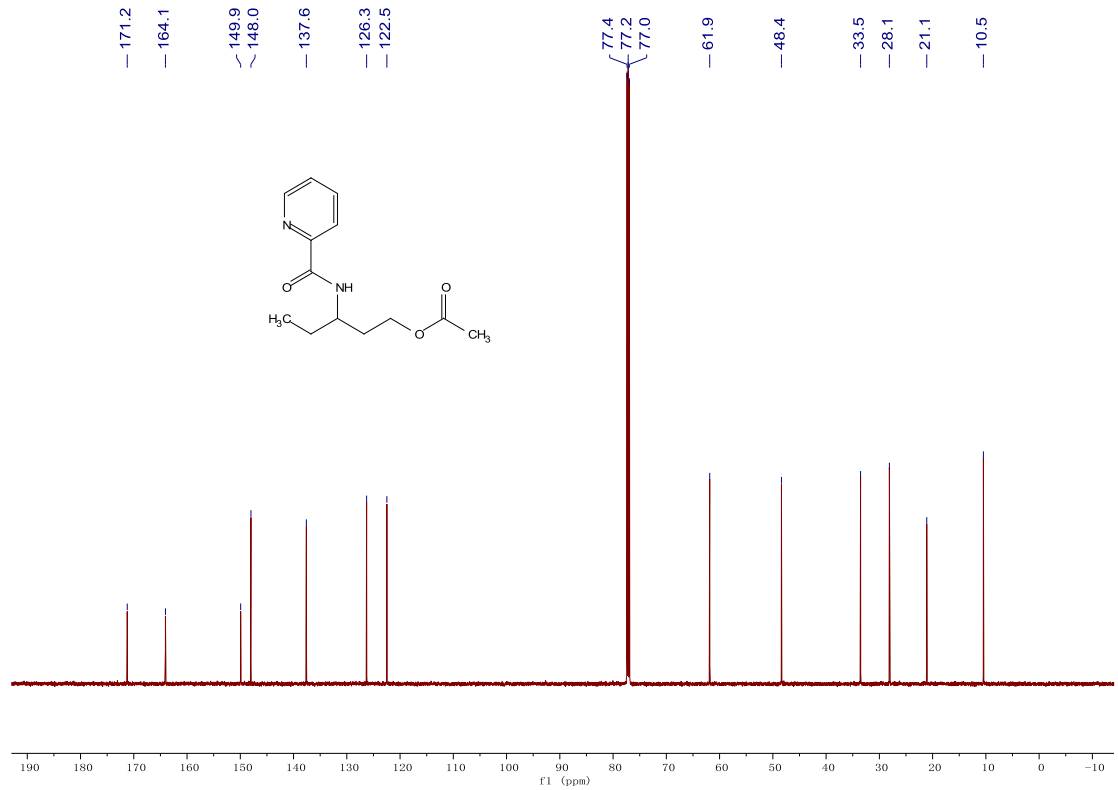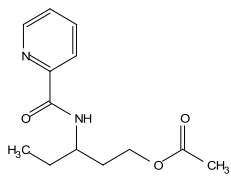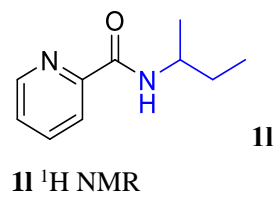

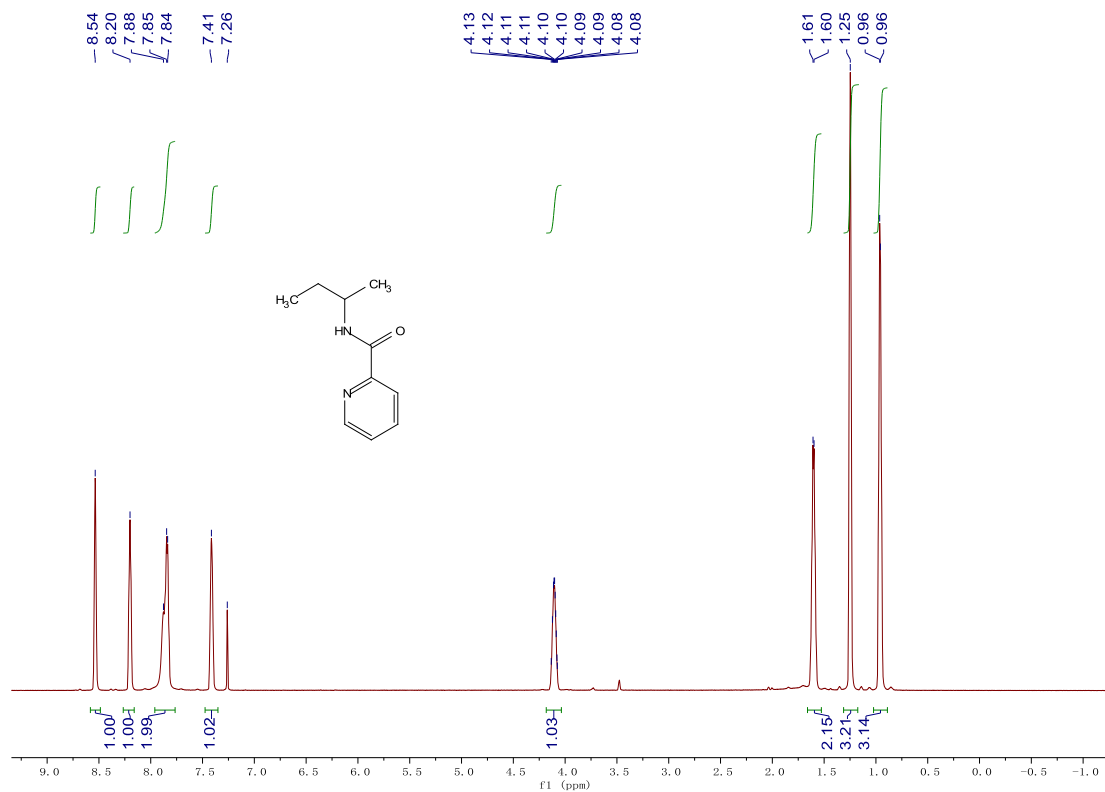

**11 <sup>13</sup>C NMR**

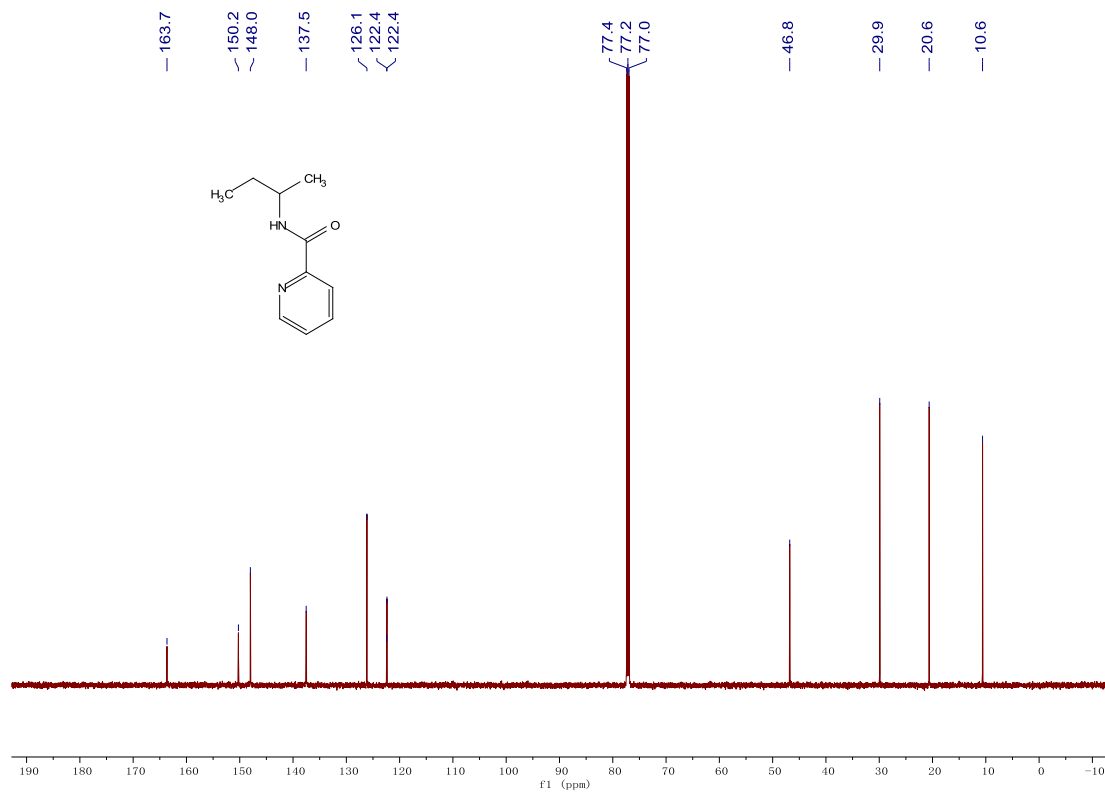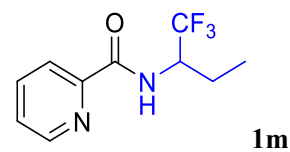

**1m <sup>1</sup>H NMR**

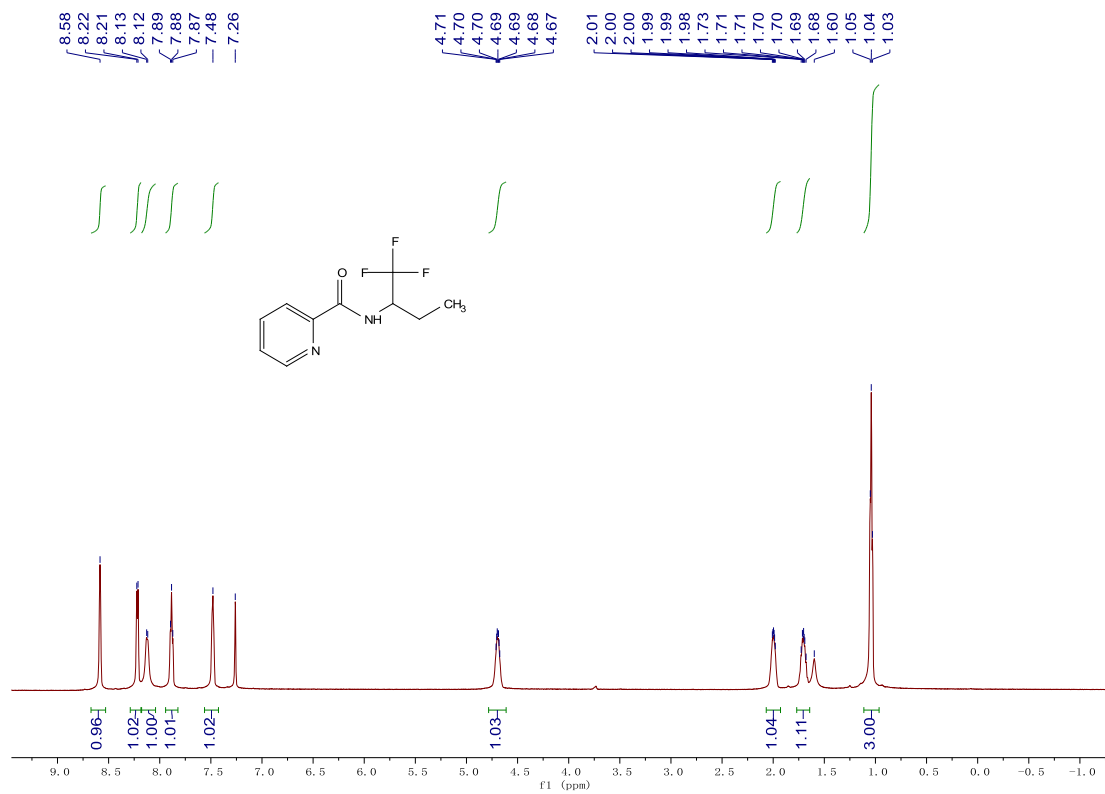

**1m** <sup>19</sup>F NMR

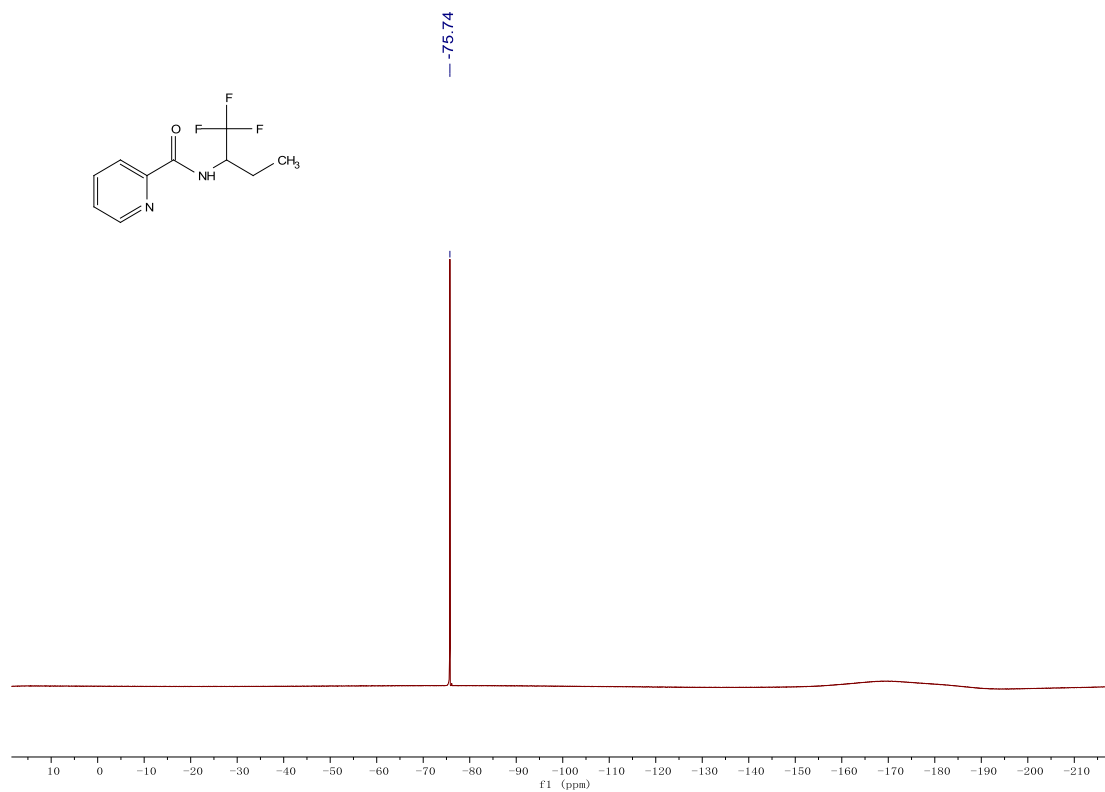

**1m** <sup>13</sup>C NMR



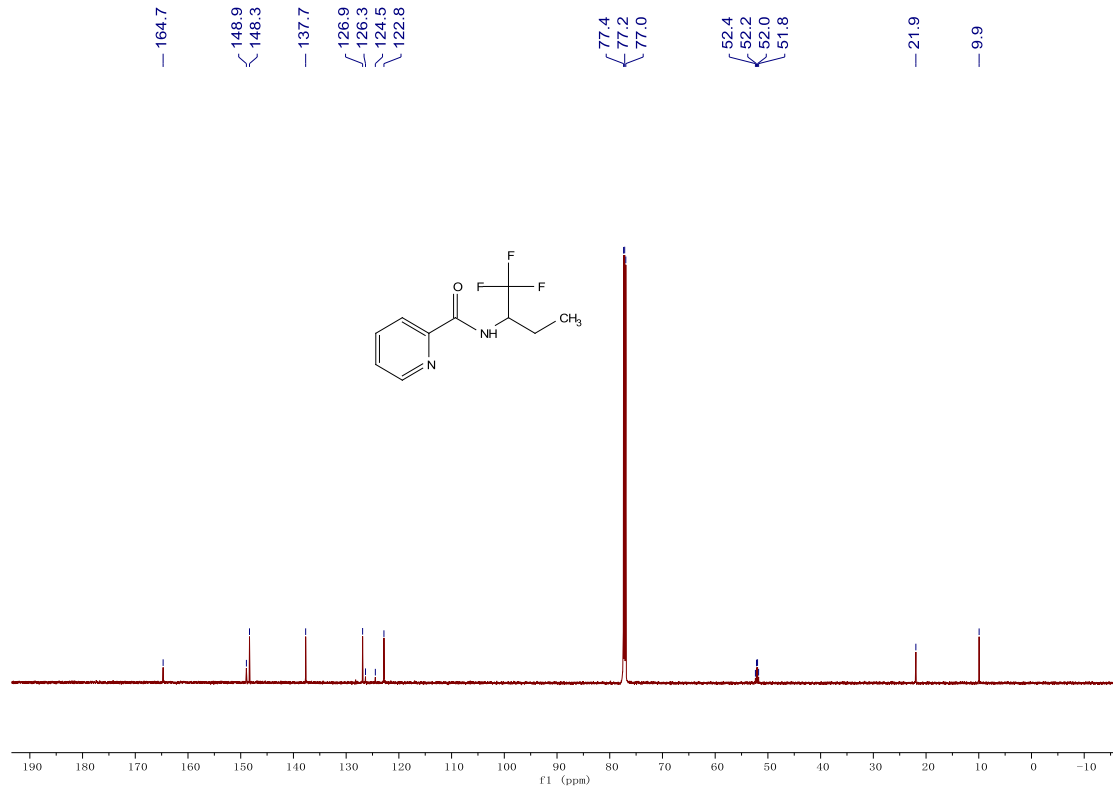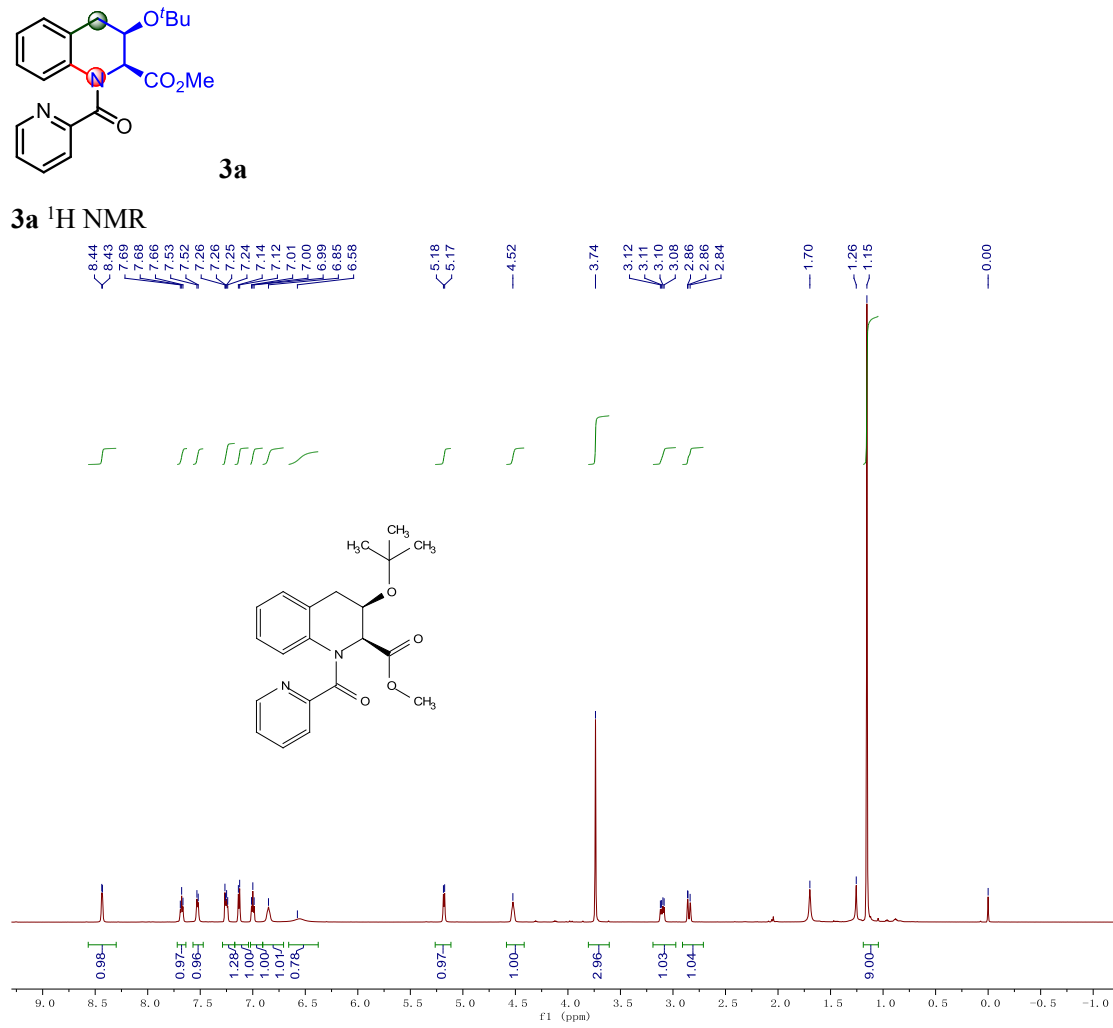

### 3a <sup>13</sup>C NMR

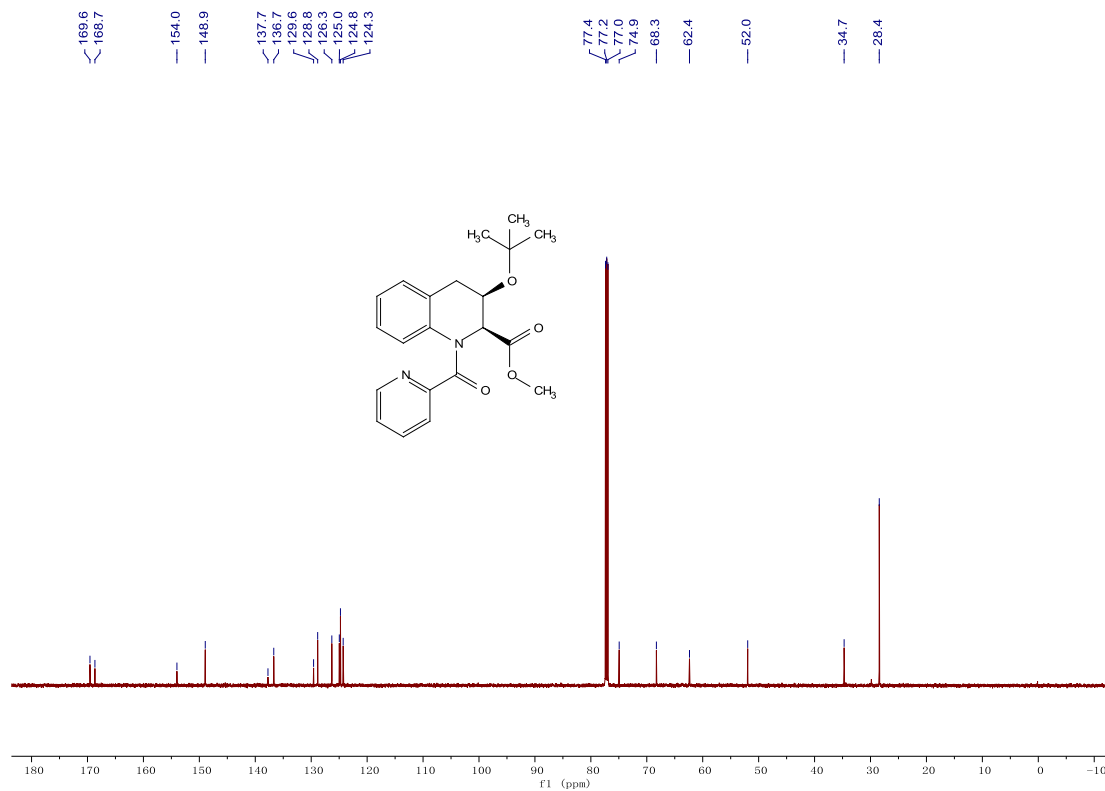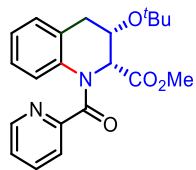

**3a-R**

### 3a-R <sup>1</sup>H NMR

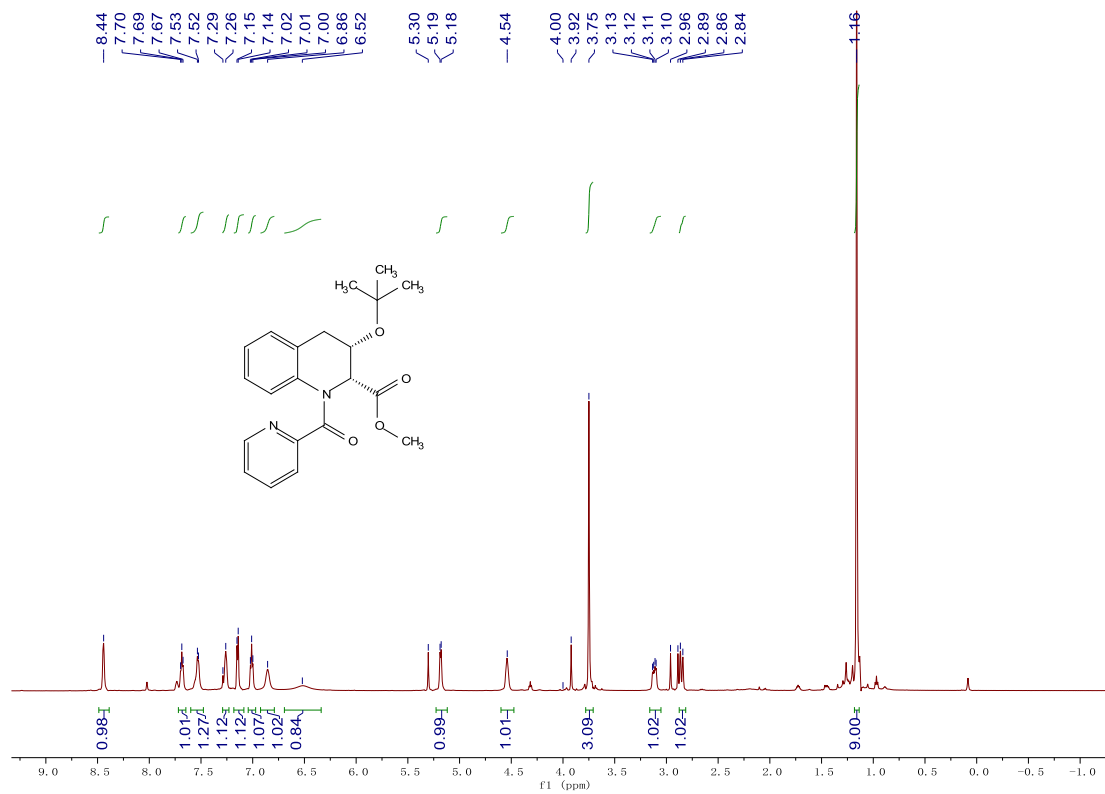

**3a-R** <sup>13</sup>C NMR

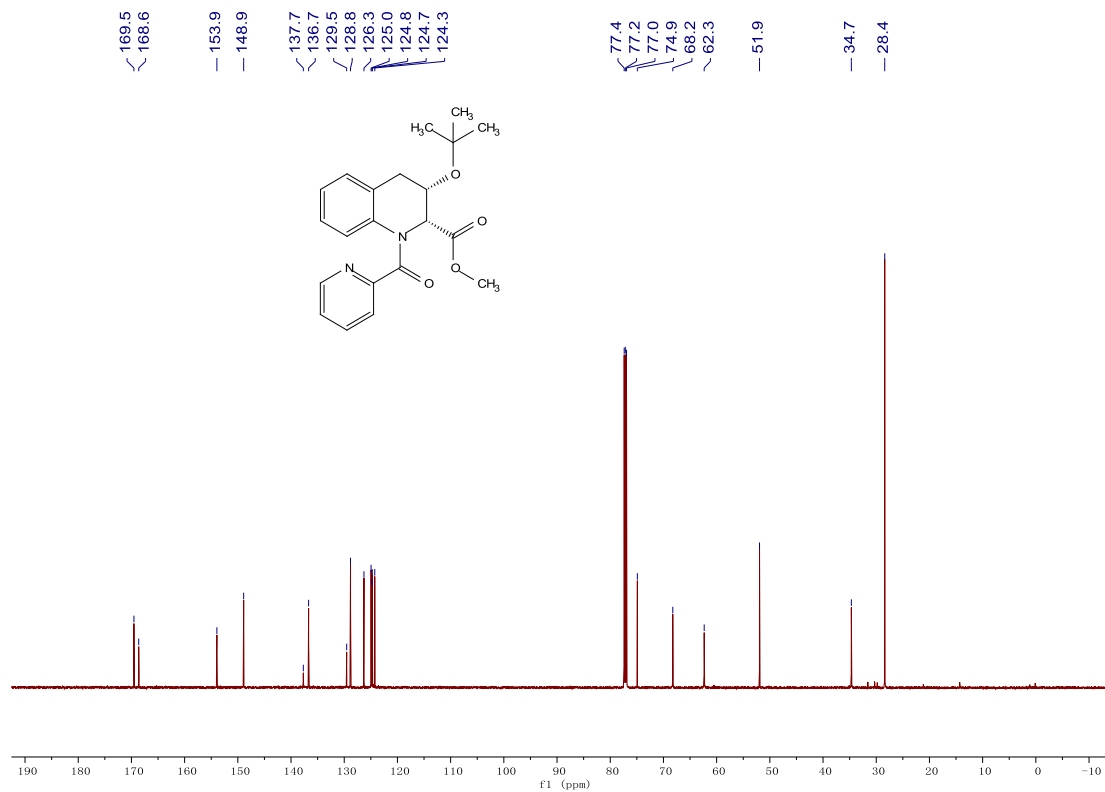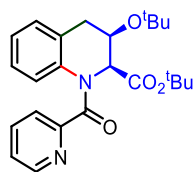

### 3b <sup>1</sup>H NMR

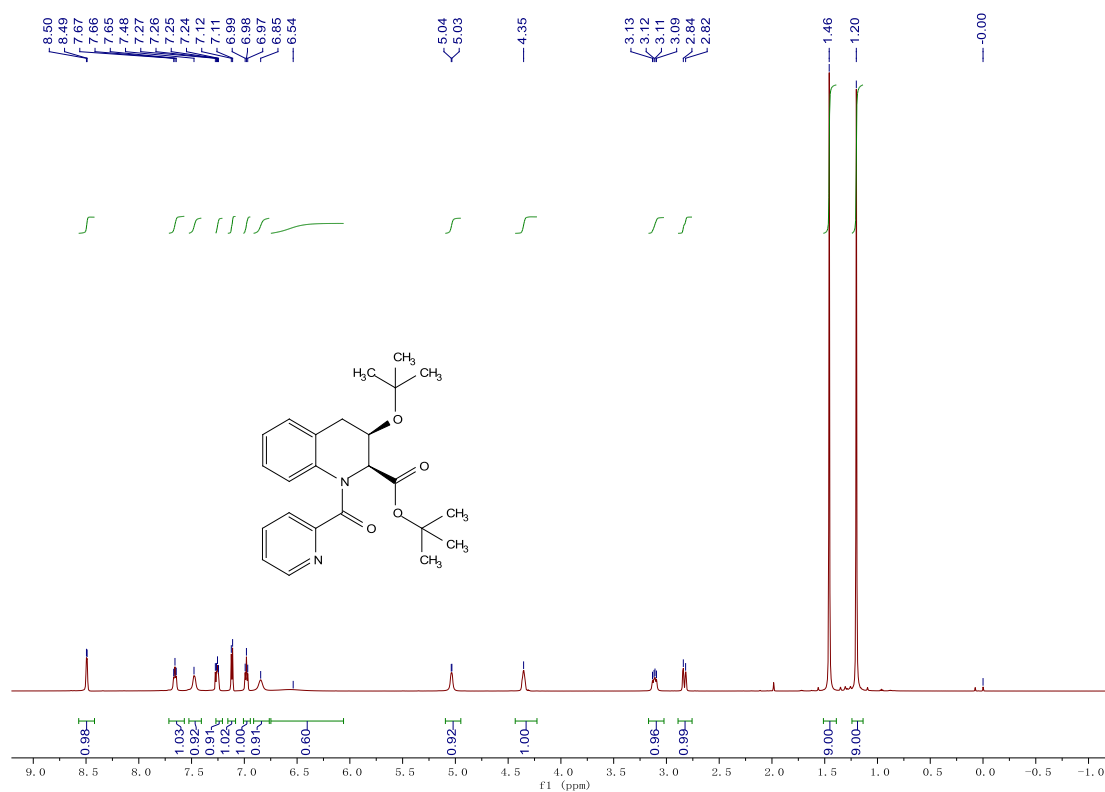

### 3b <sup>13</sup>C NMR

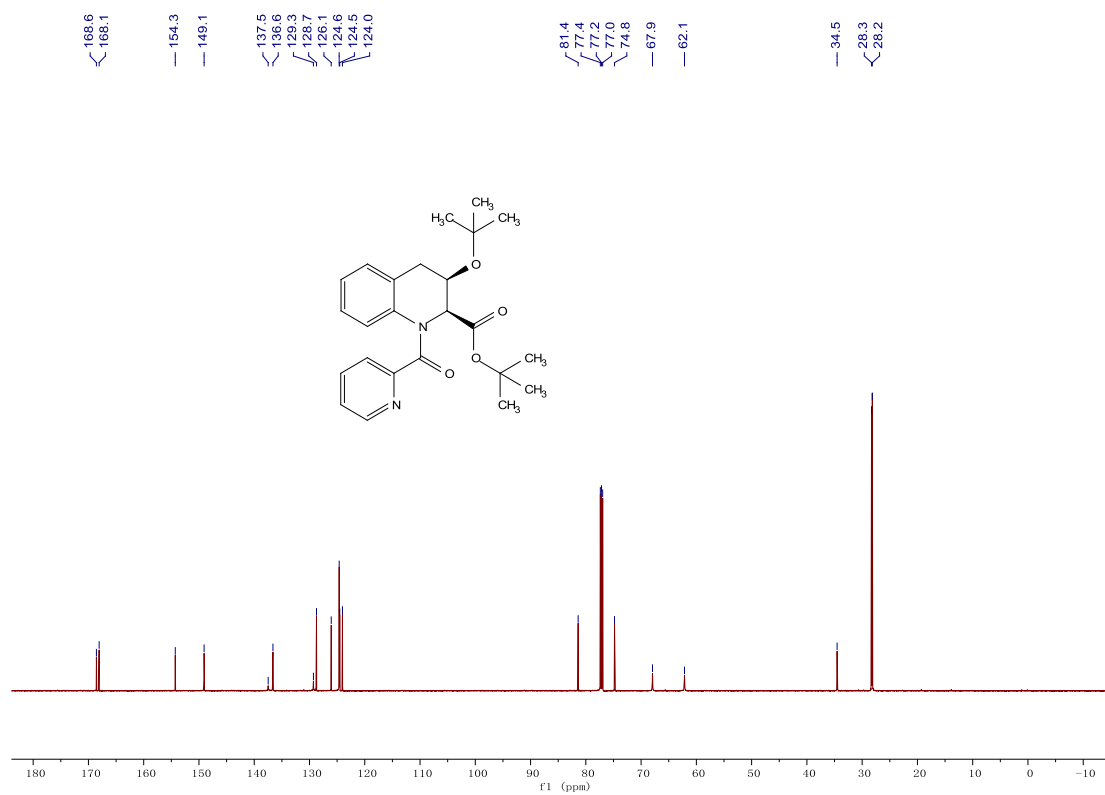

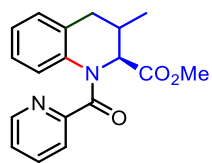

**3c-s**

**3c-S <sup>1</sup>H NMR**

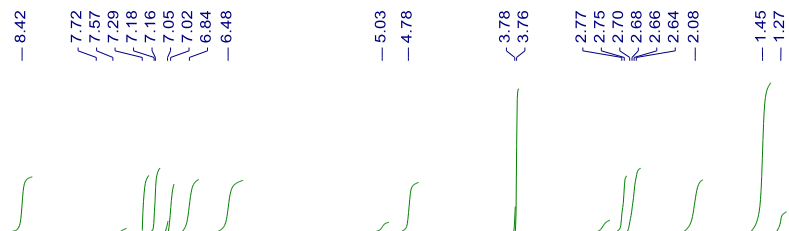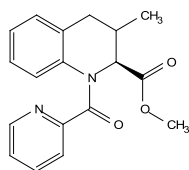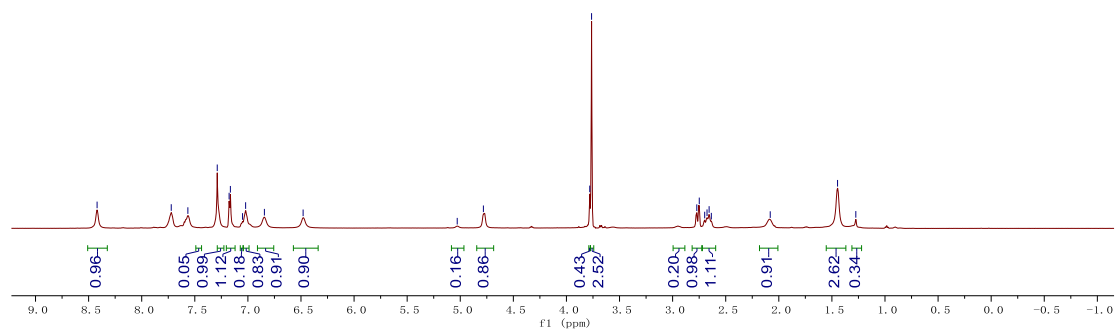

**3c-S <sup>13</sup>C NMR**

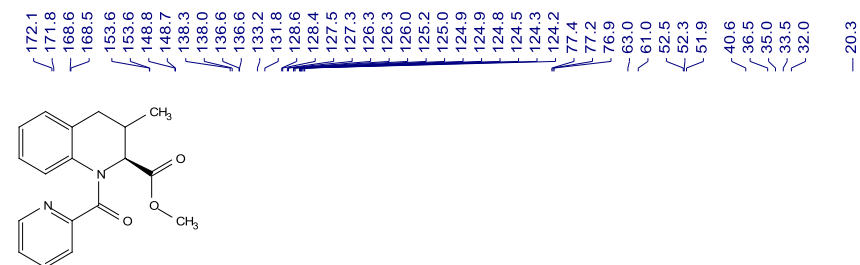

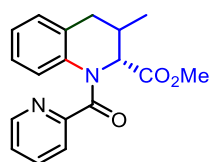

**3c-R**

**3c-R <sup>1</sup>H NMR**

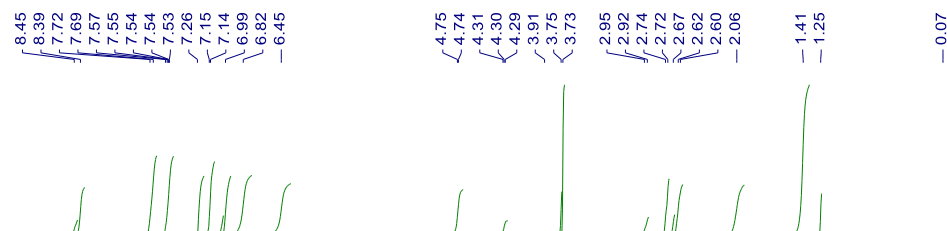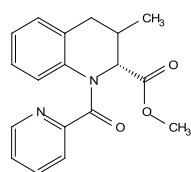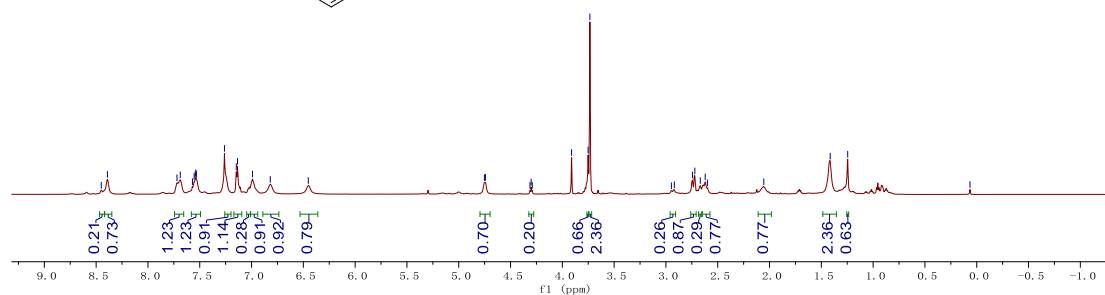

**3c-R <sup>13</sup>C NMR**

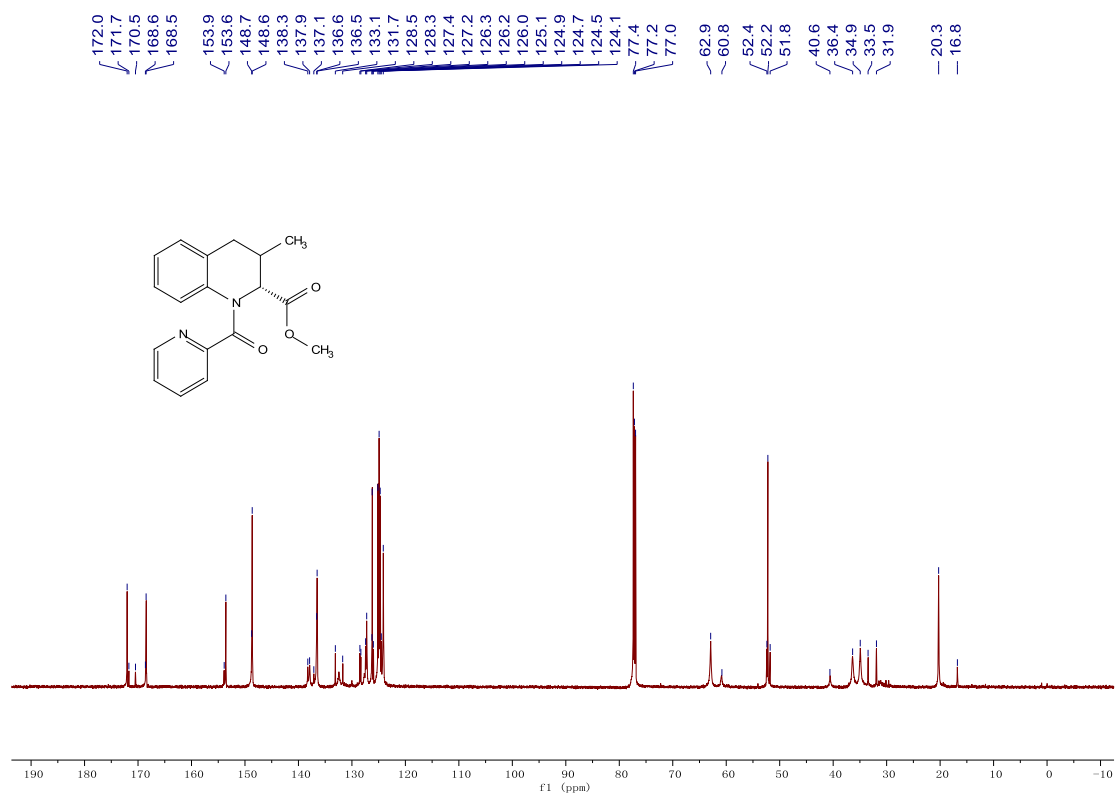

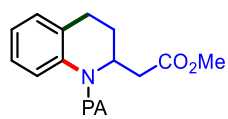

**3d**

**3d <sup>1</sup>H NMR**

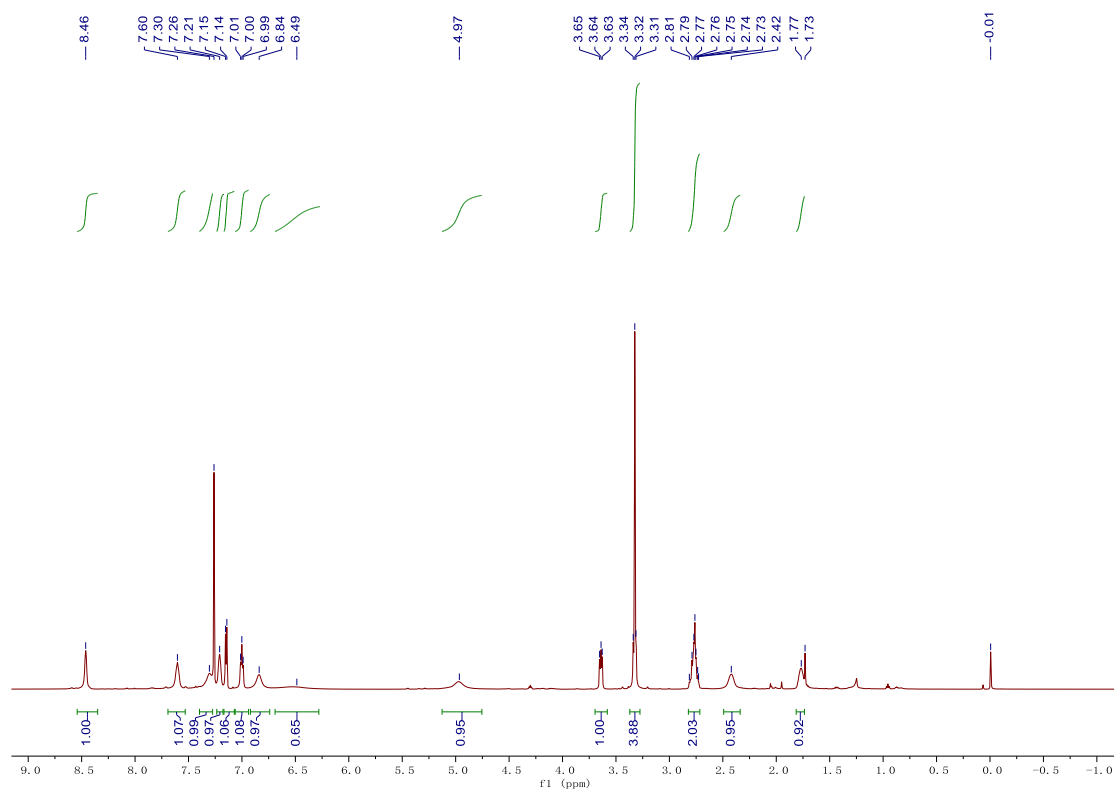

**3d <sup>13</sup>C NMR**

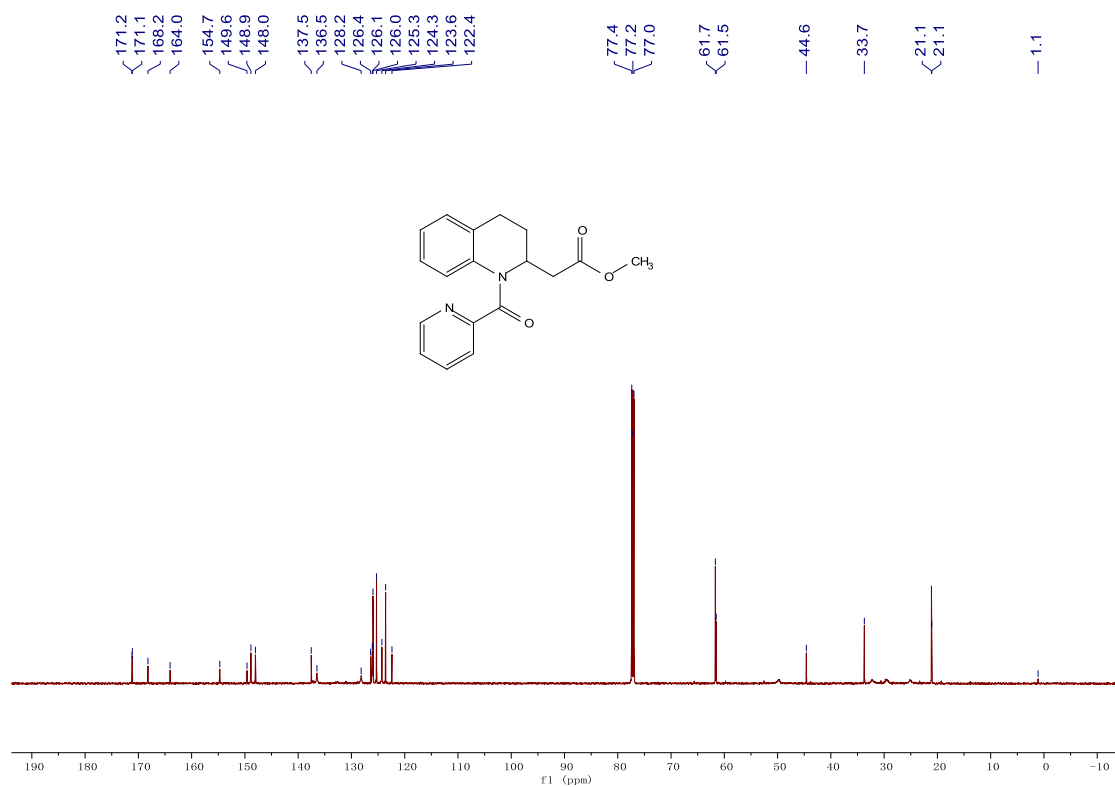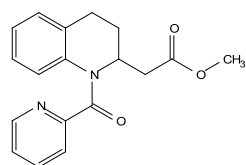

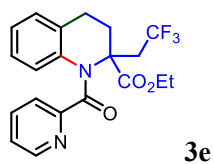

**3e** <sup>1</sup>H NMR

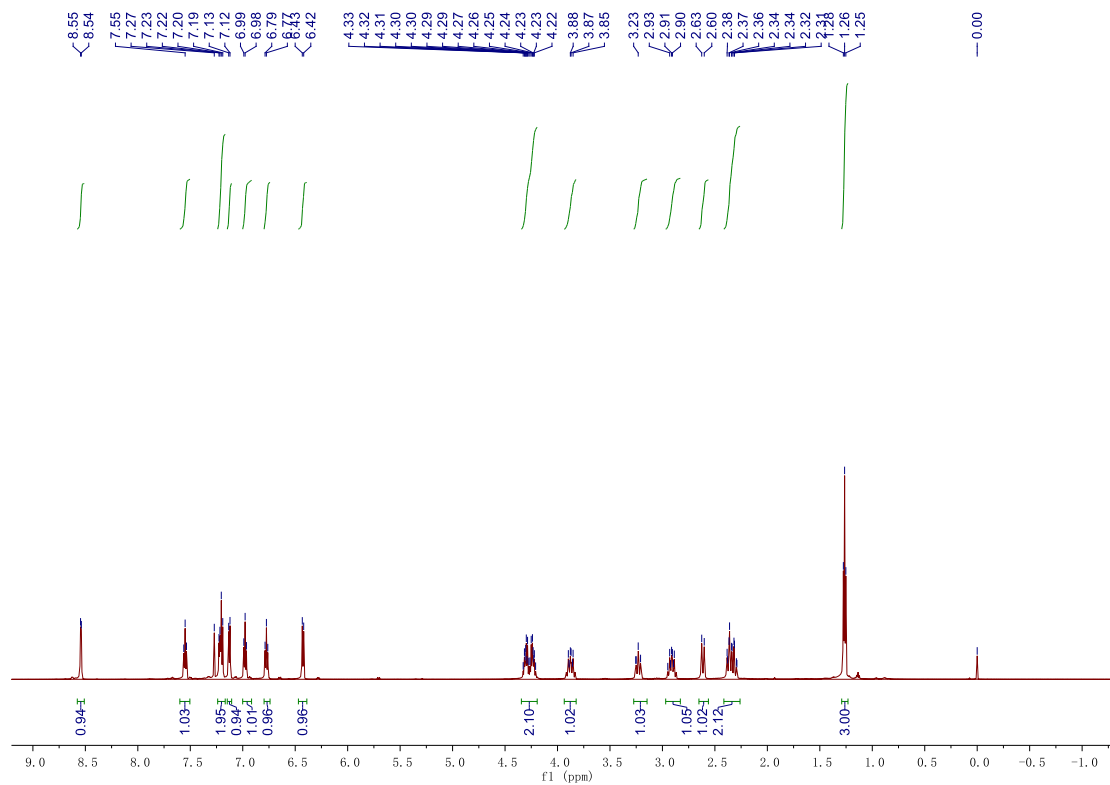

**3e** <sup>19</sup>F NMR

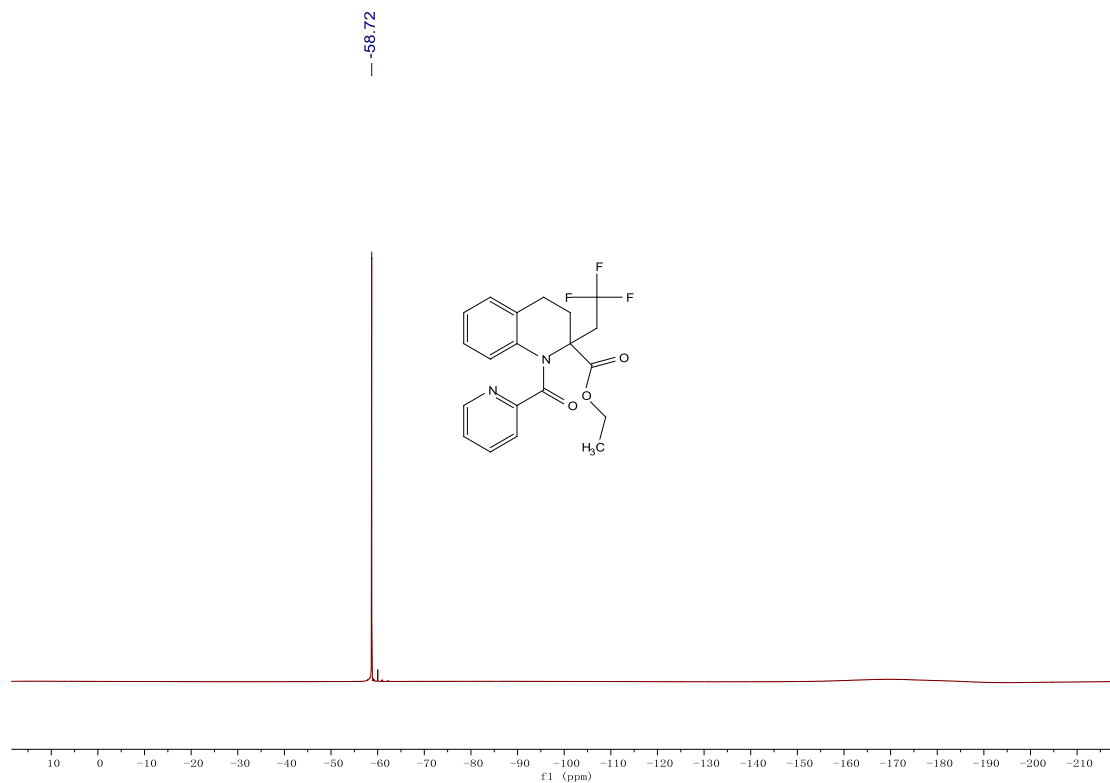



**3e**  $^{13}\text{C}$  NMR

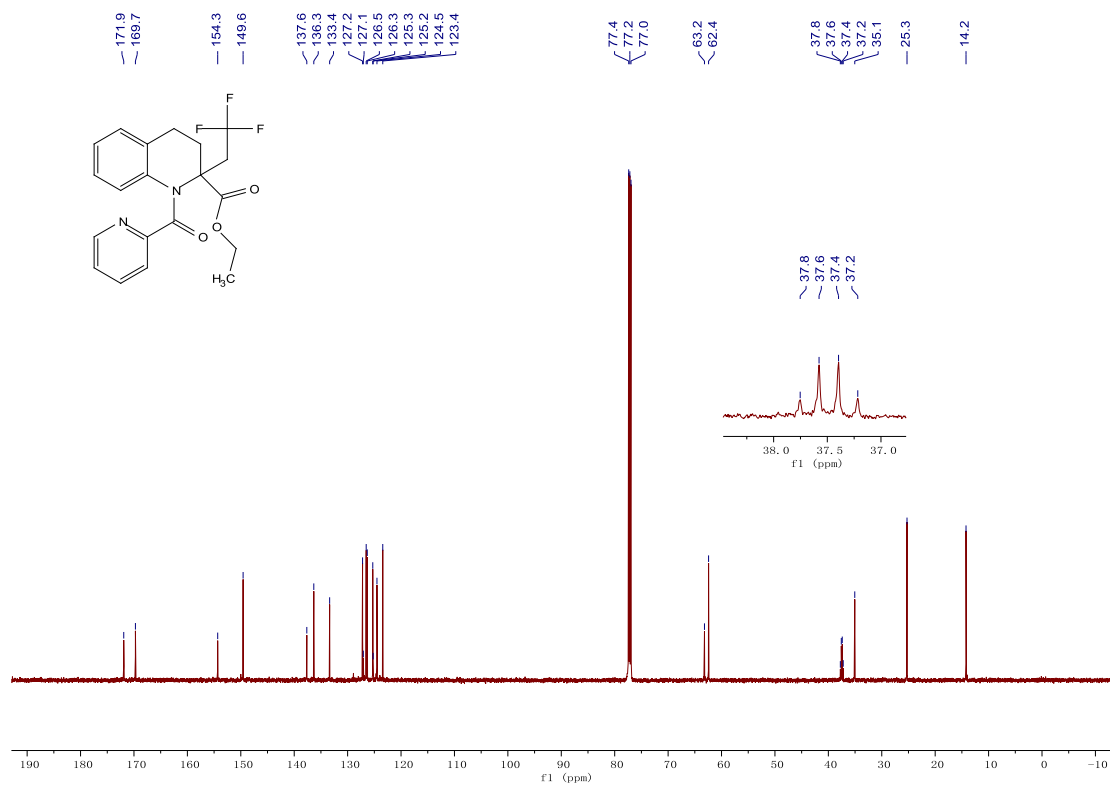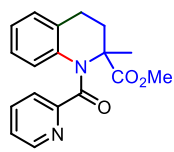

**3f**  $^1\text{H}$  NMR

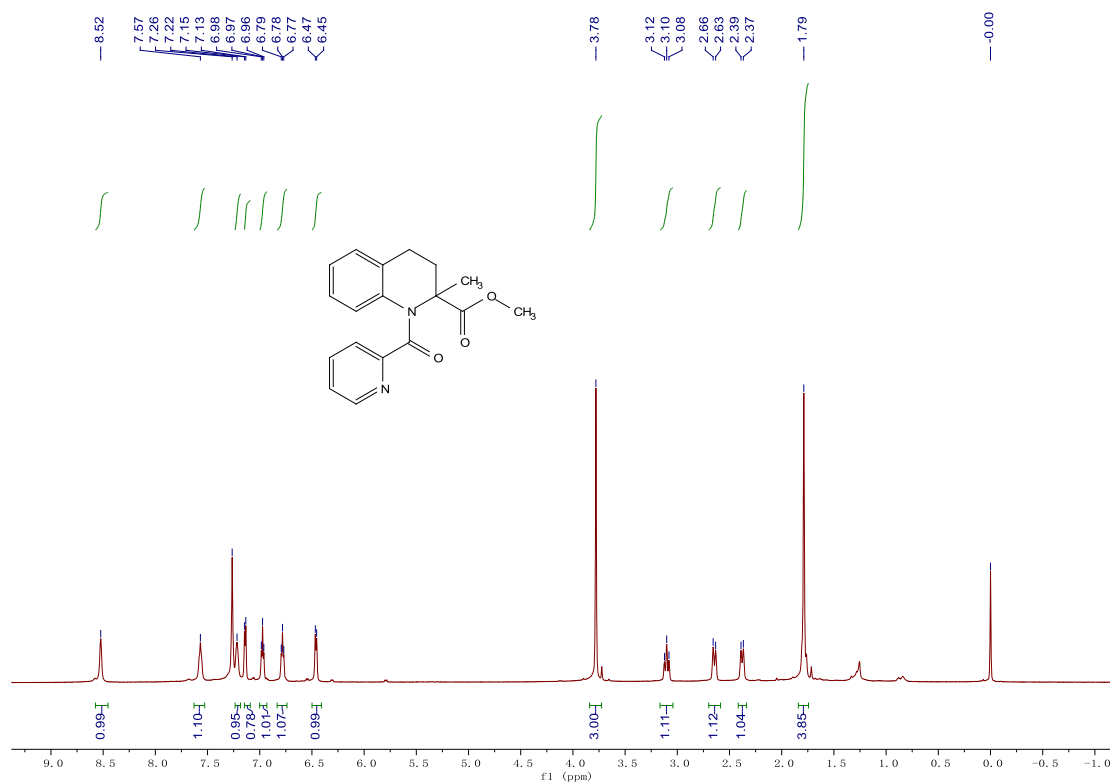

### 3f <sup>13</sup>C NMR

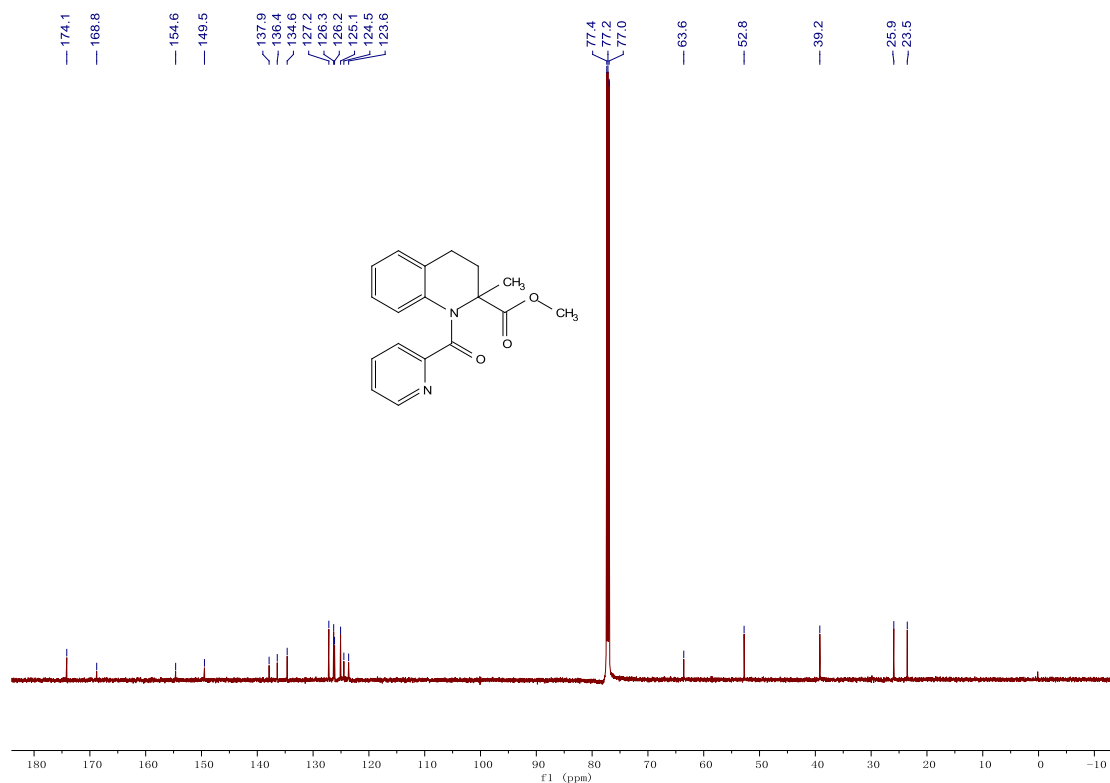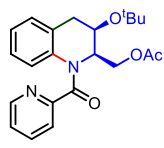

3g

### 3g <sup>1</sup>H NMR

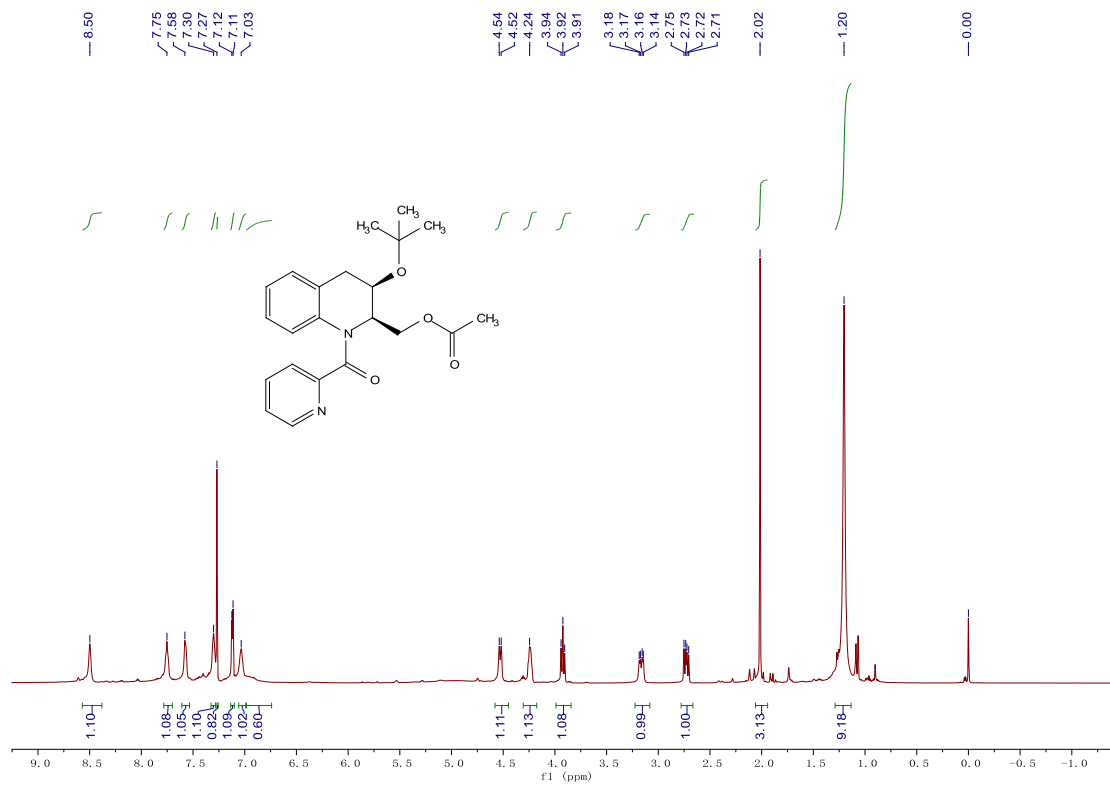

### 3g <sup>13</sup>C NMR

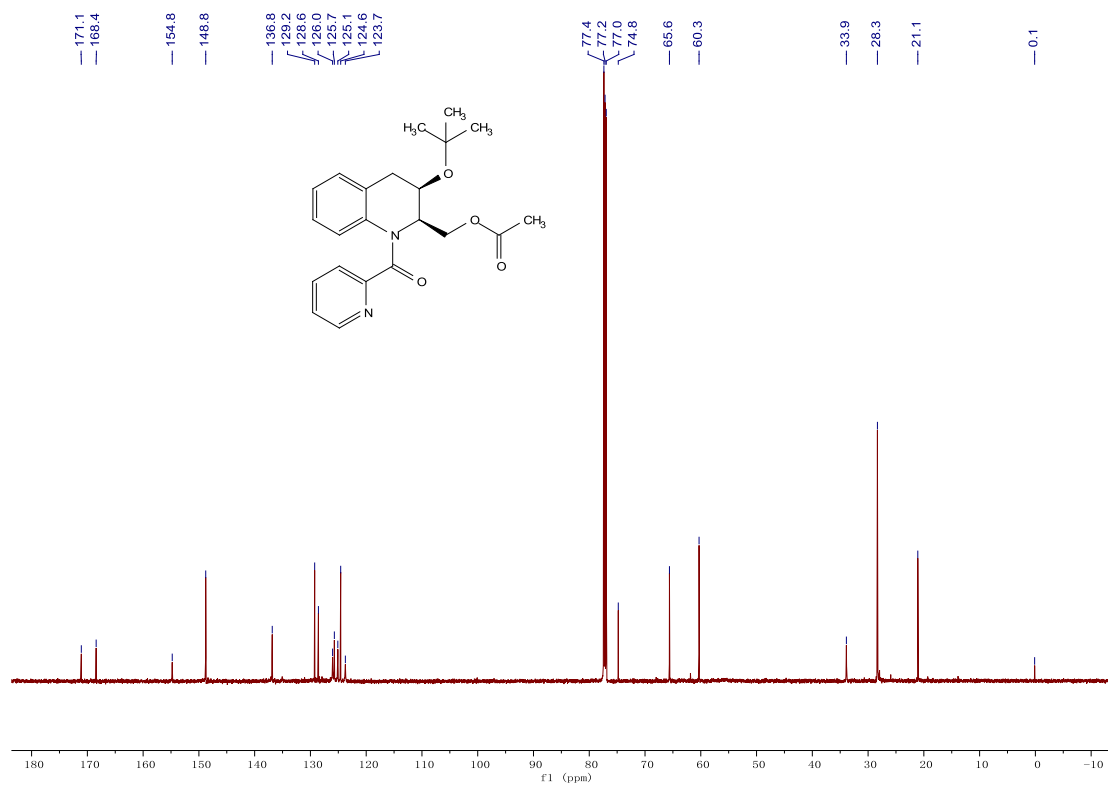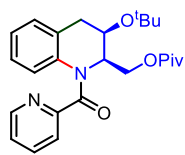

### 3h

### 3h <sup>1</sup>H NMR

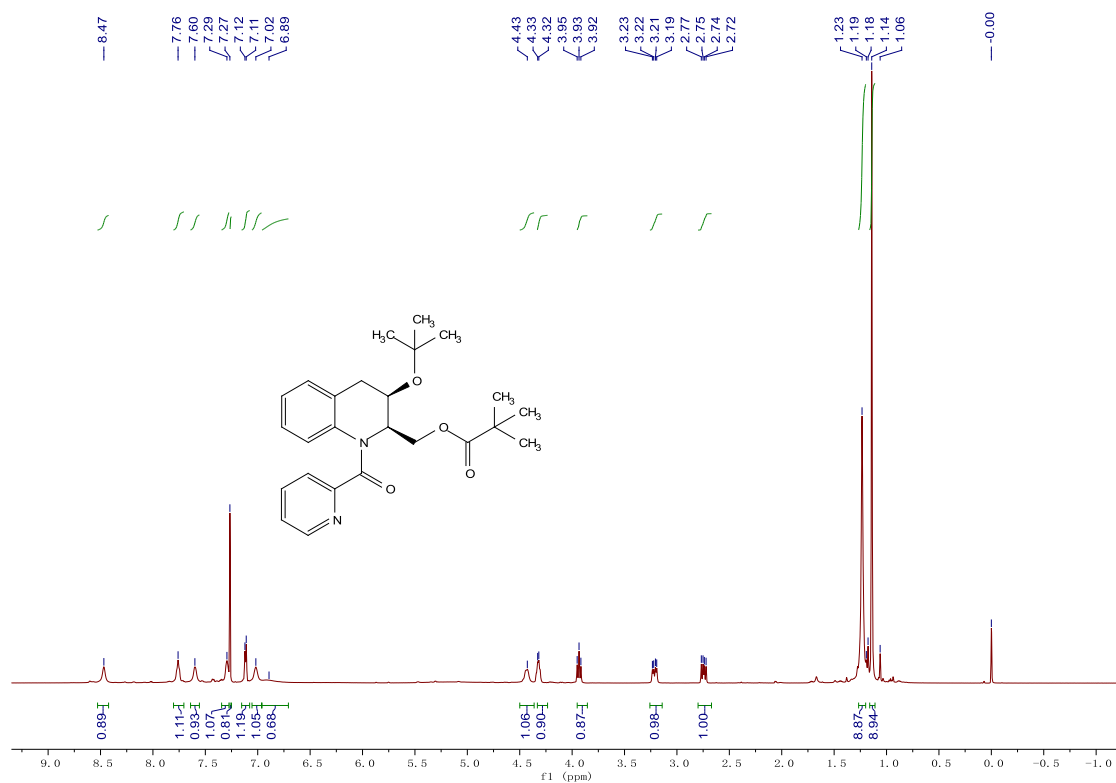

### 3h <sup>13</sup>C NMR

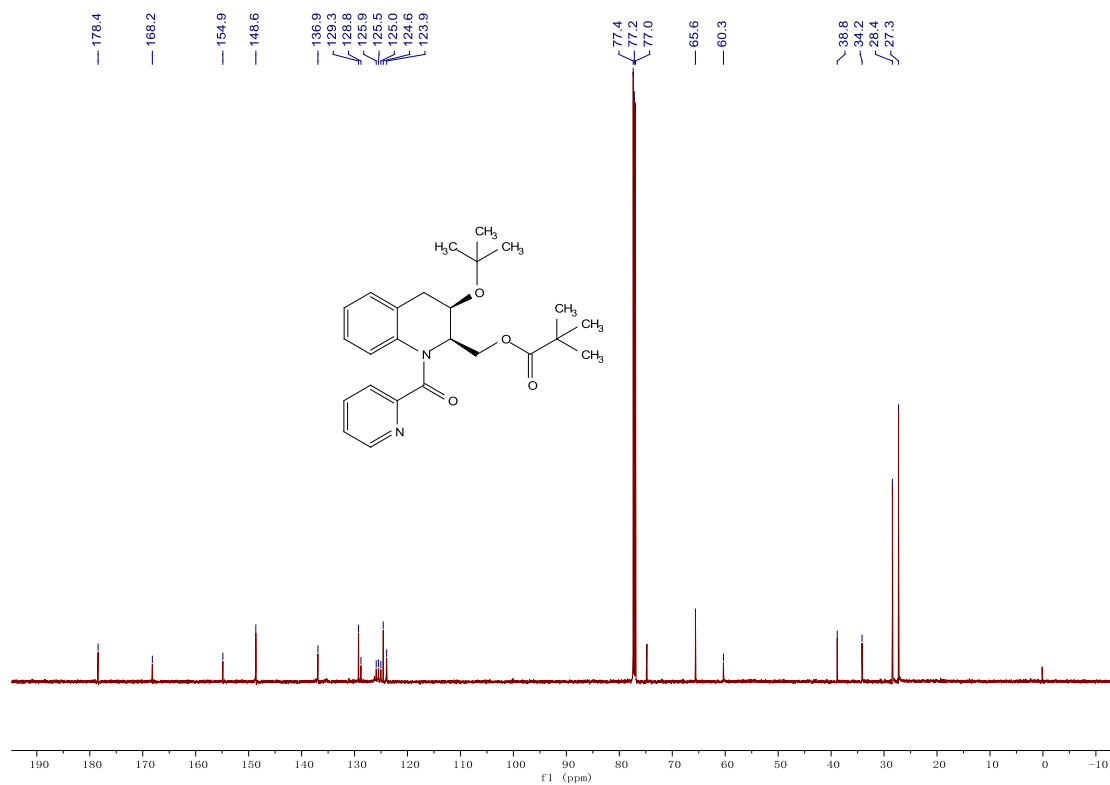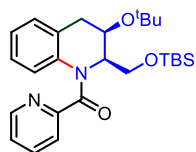

3i

### 3i <sup>1</sup>H NMR

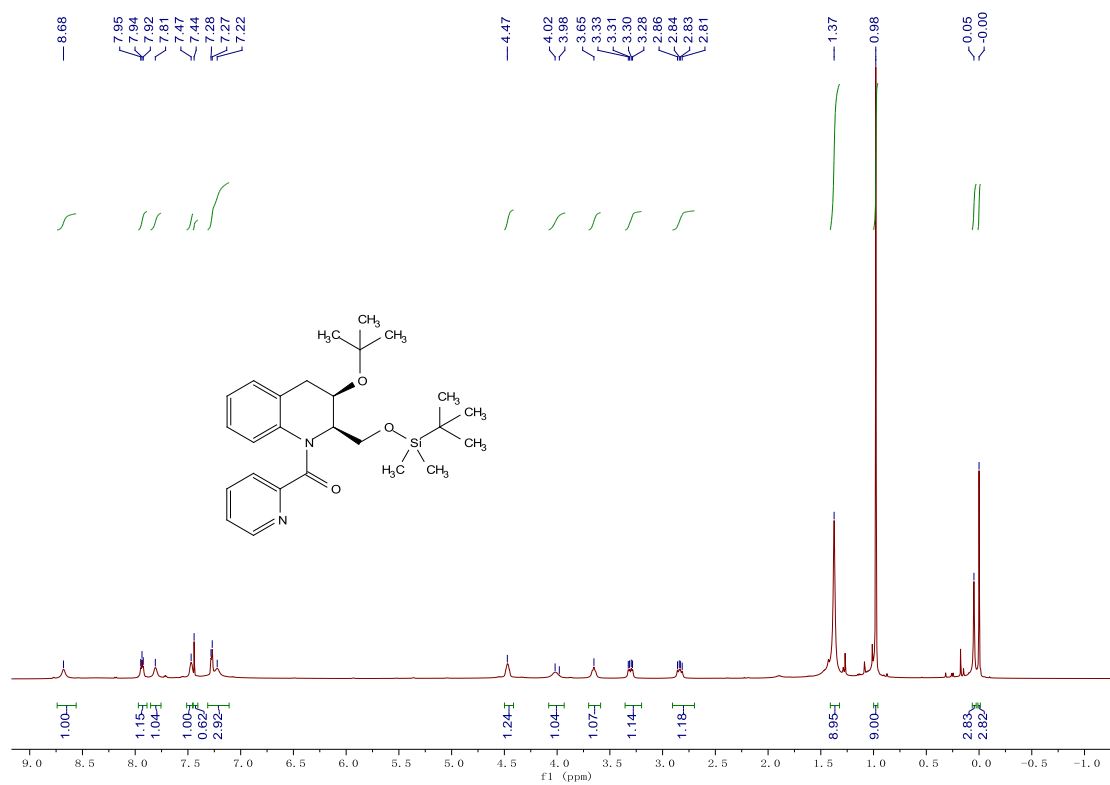

### 3i <sup>13</sup>C NMR

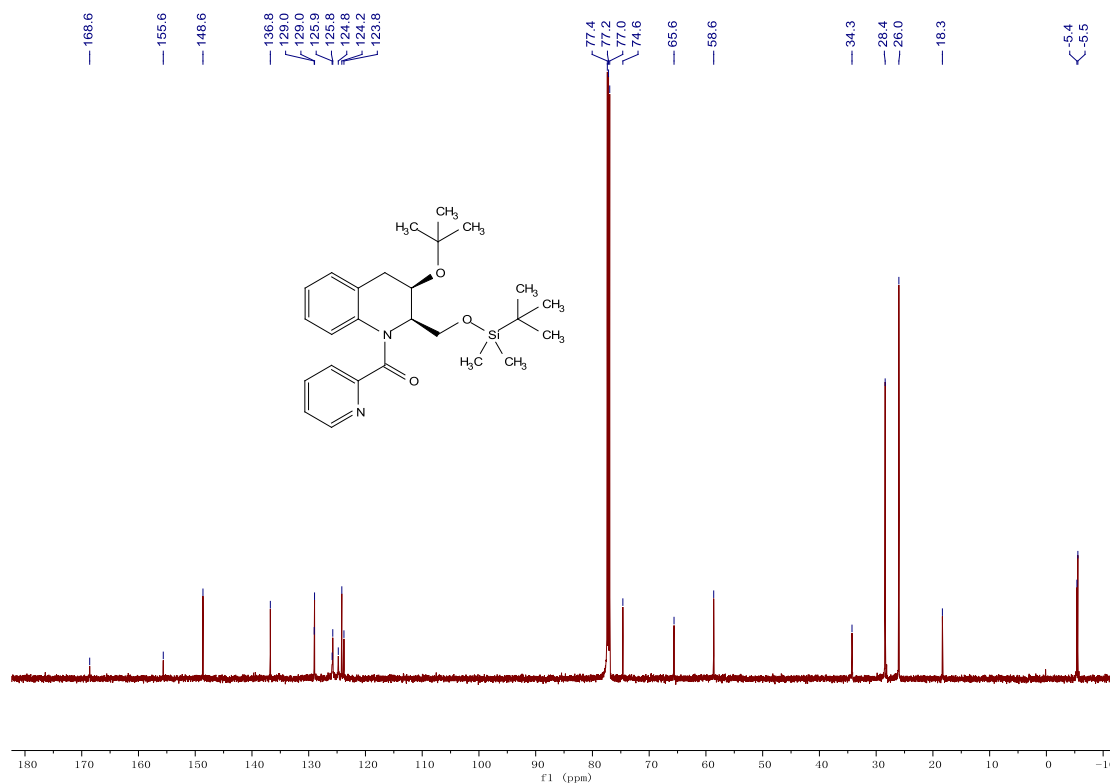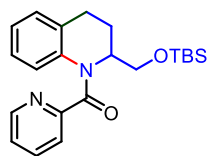

3j

### 3j <sup>1</sup>H NMR

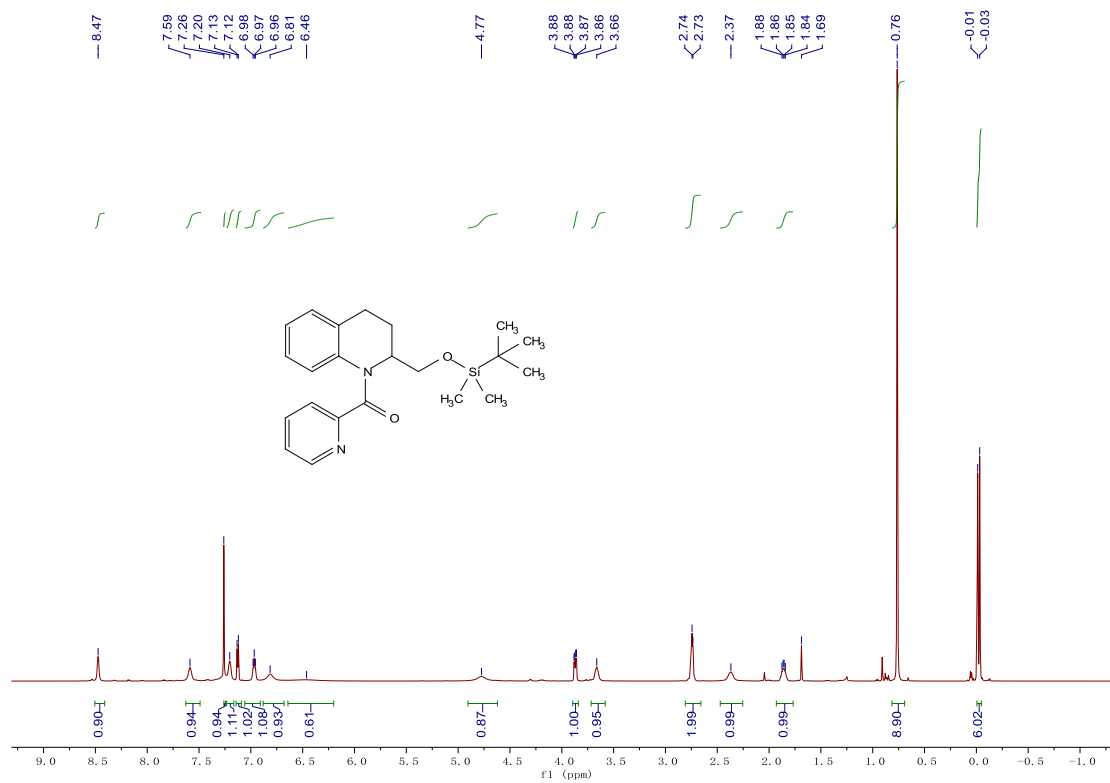

### 3j <sup>13</sup>C NMR

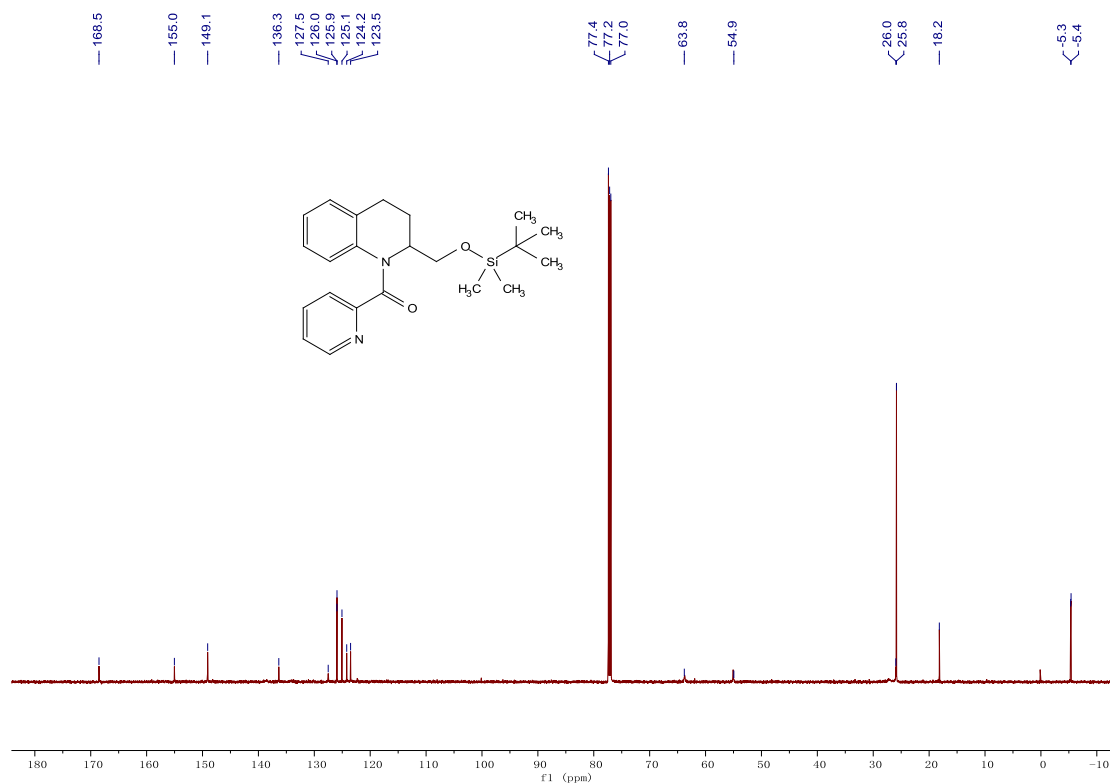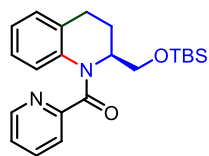

### 3j-S

### 3j-S <sup>1</sup>H NMR

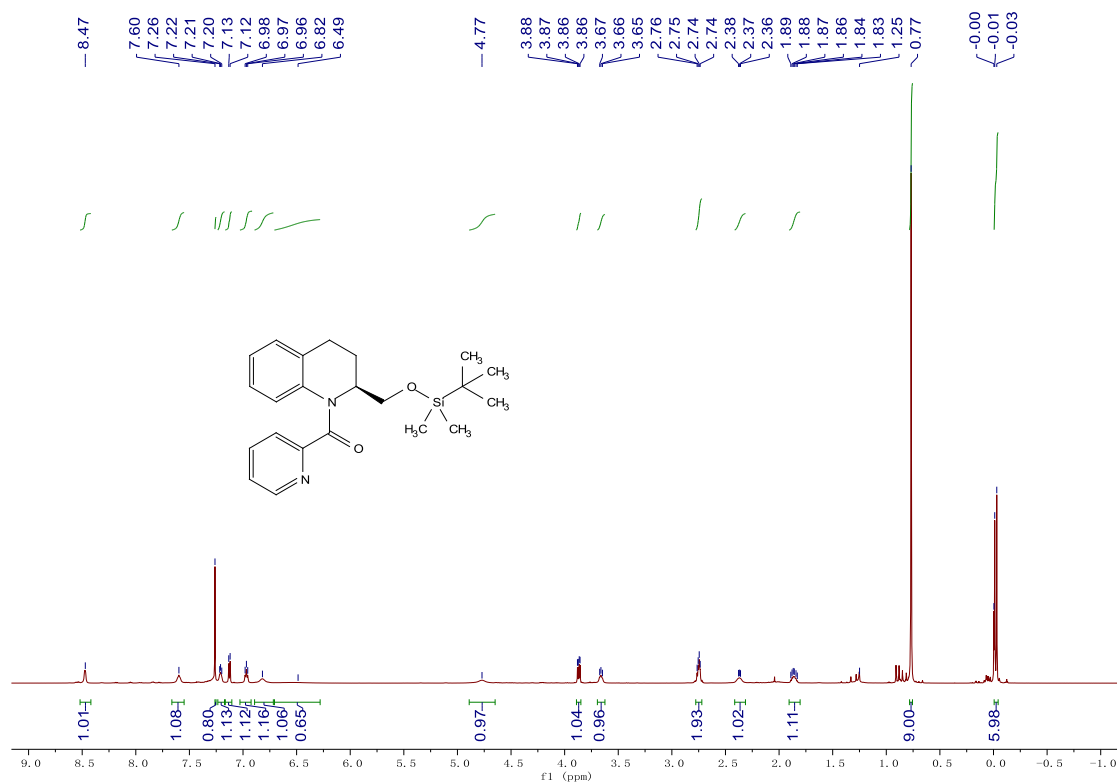

### 3j-S <sup>13</sup>C NMR

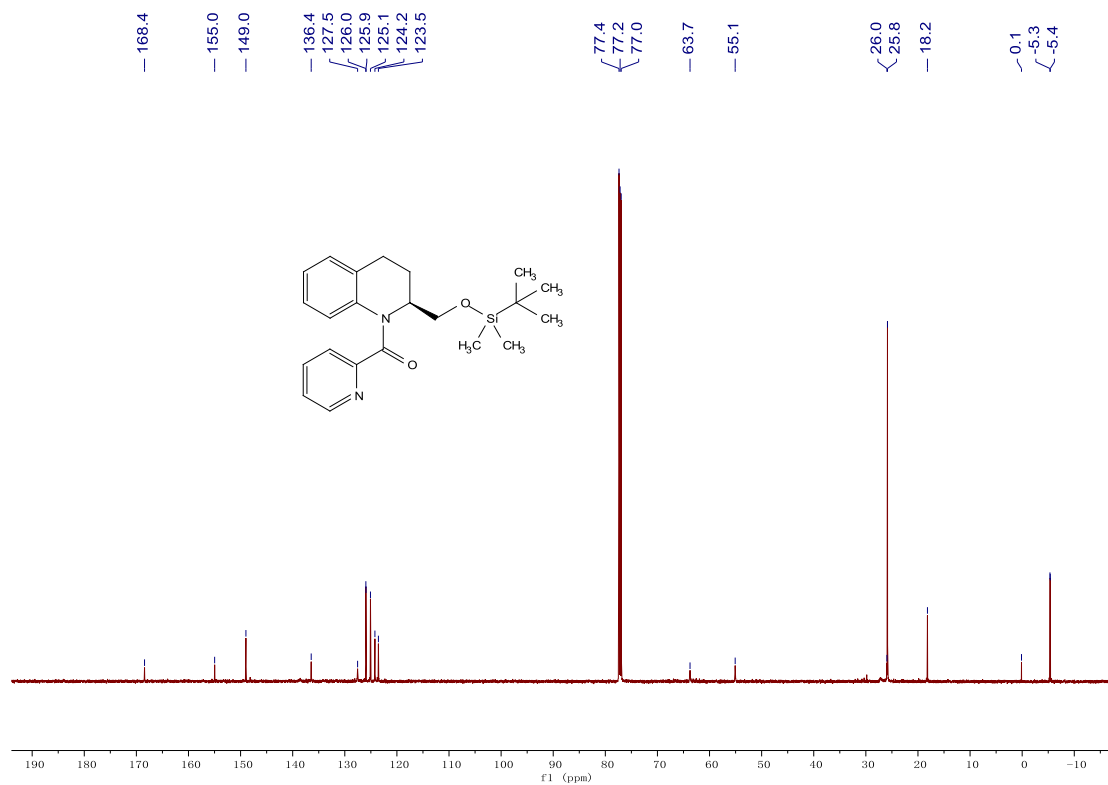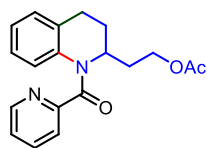

**3k**

### 3k <sup>1</sup>H NMR

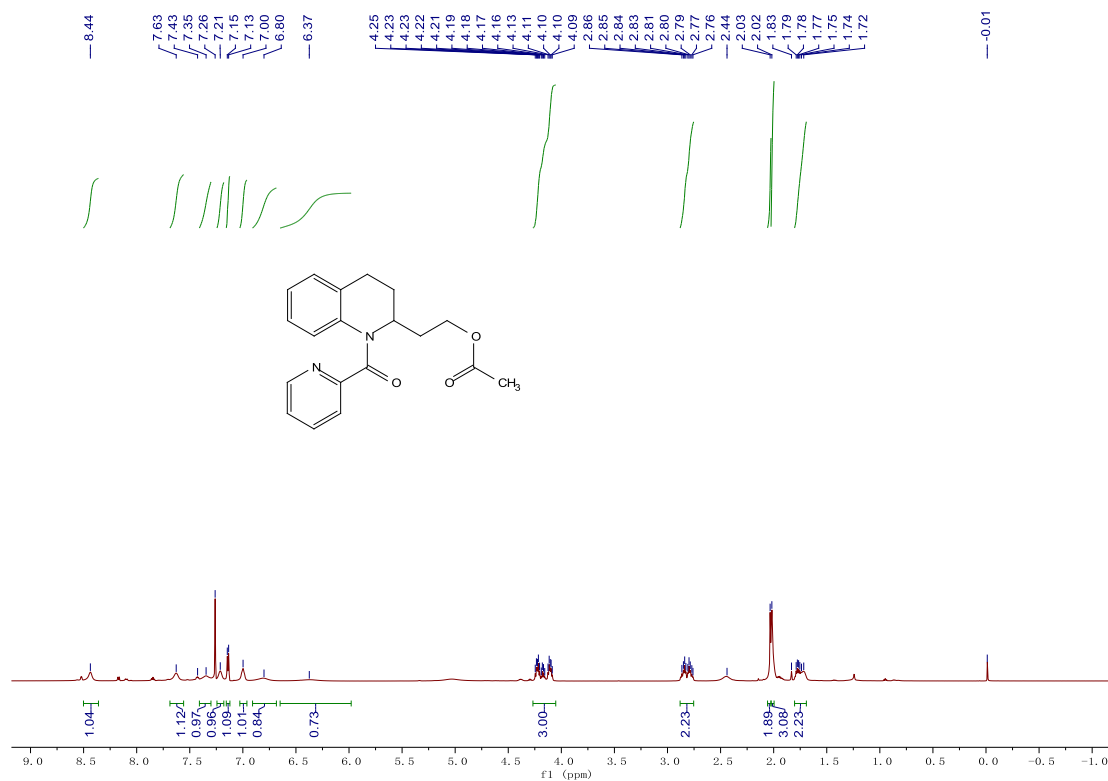

### 3k <sup>13</sup>C NMR

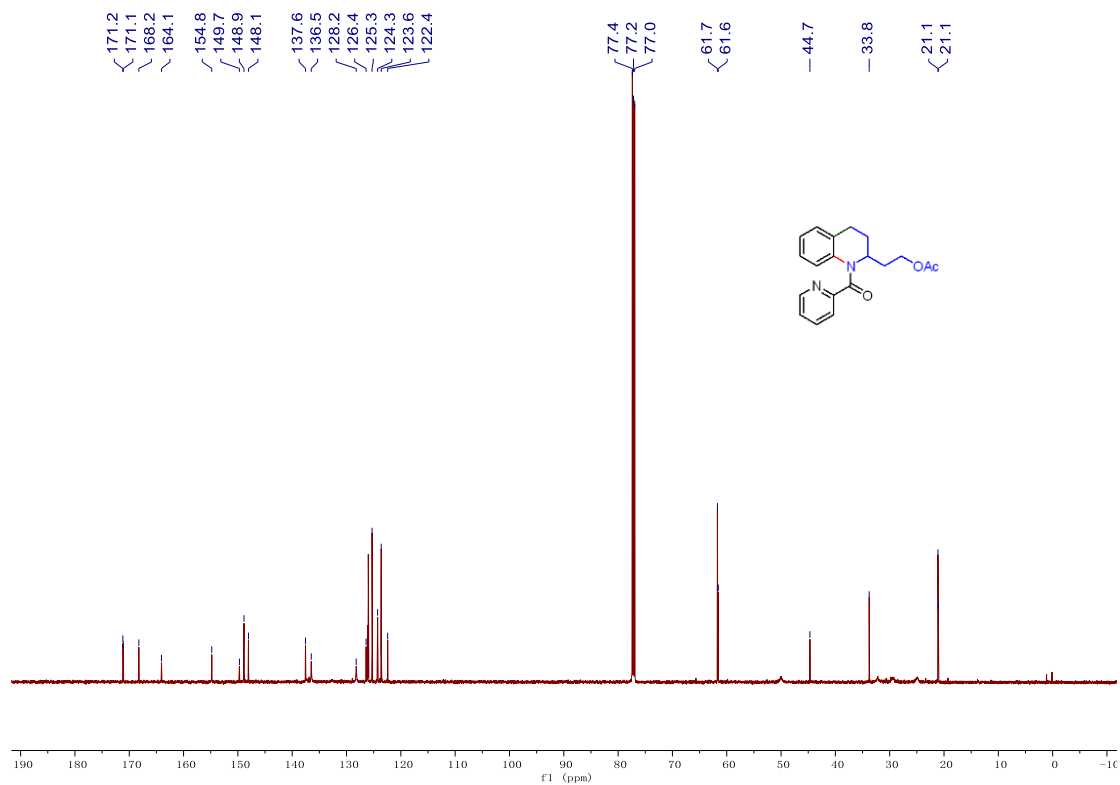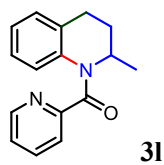

### 3l <sup>1</sup>H NMR

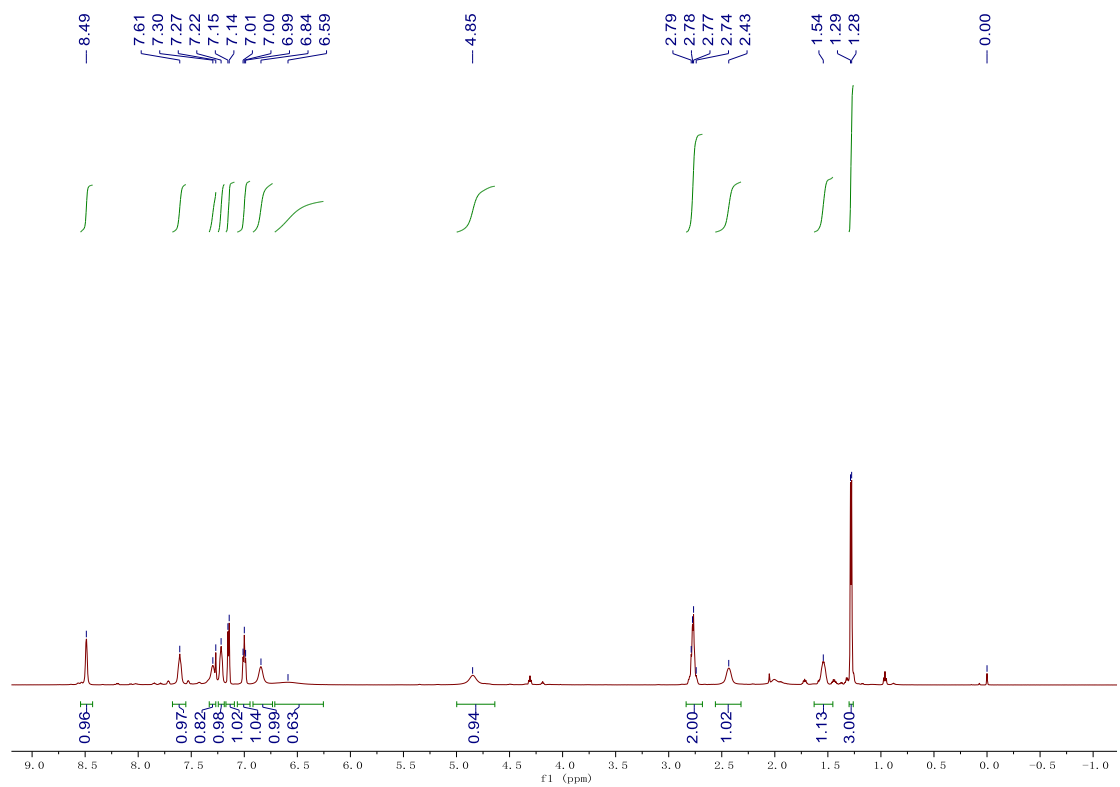



### 3i <sup>13</sup>C NMR

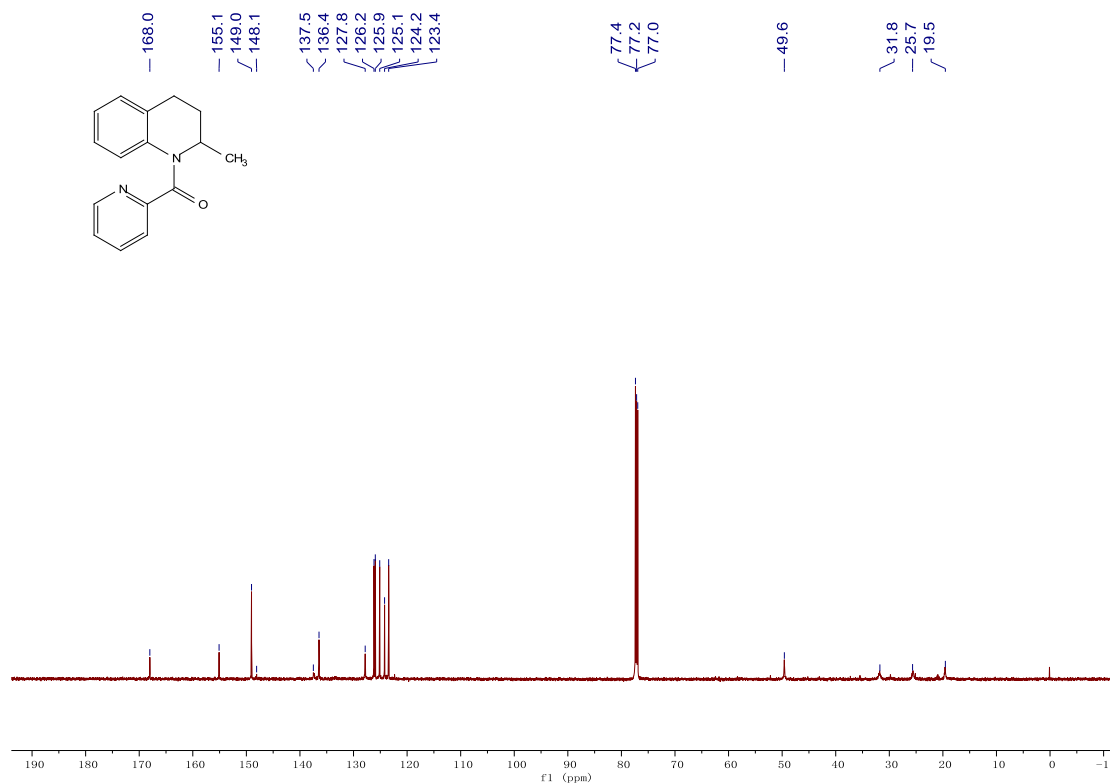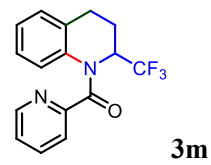

### 3m <sup>1</sup>H NMR

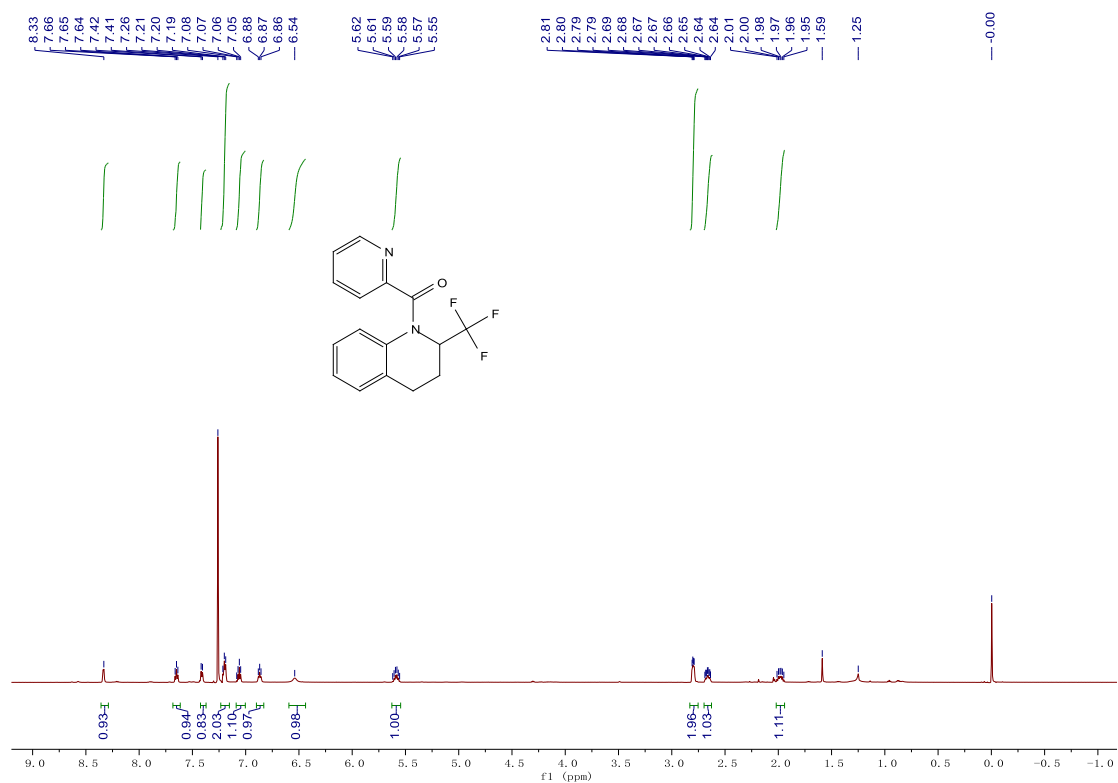

### 3m <sup>19</sup>F NMR

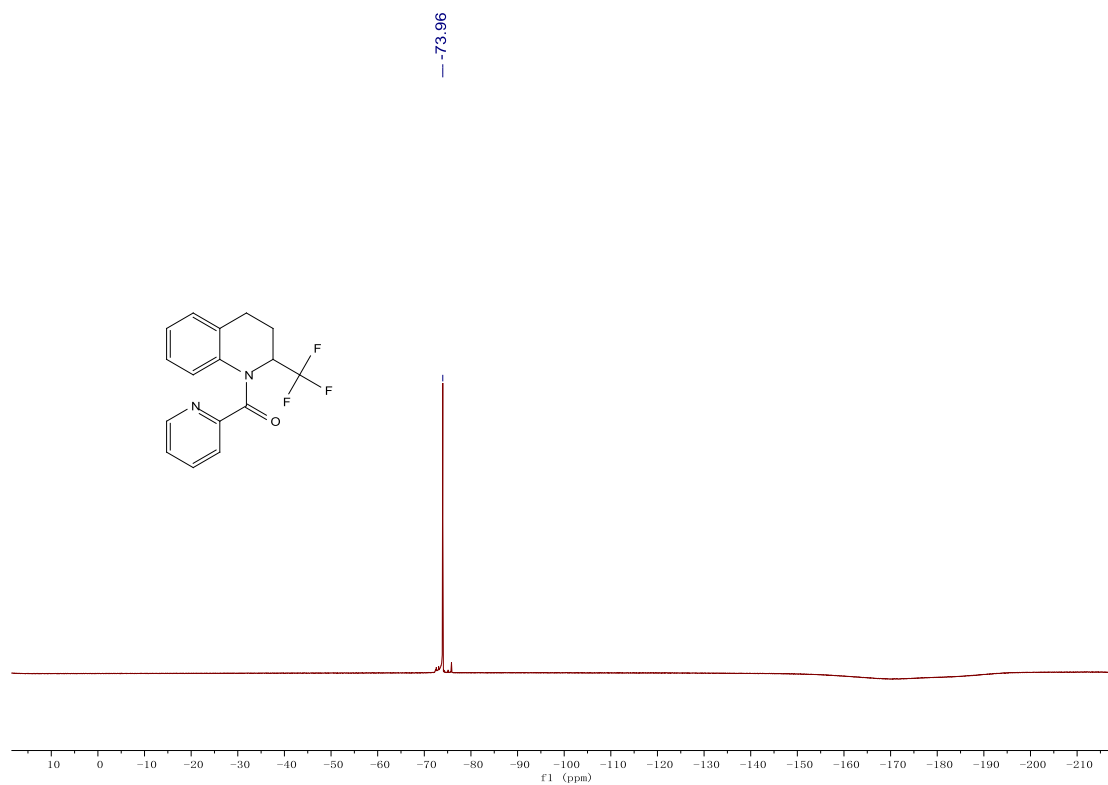

### 3m <sup>13</sup>C NMR

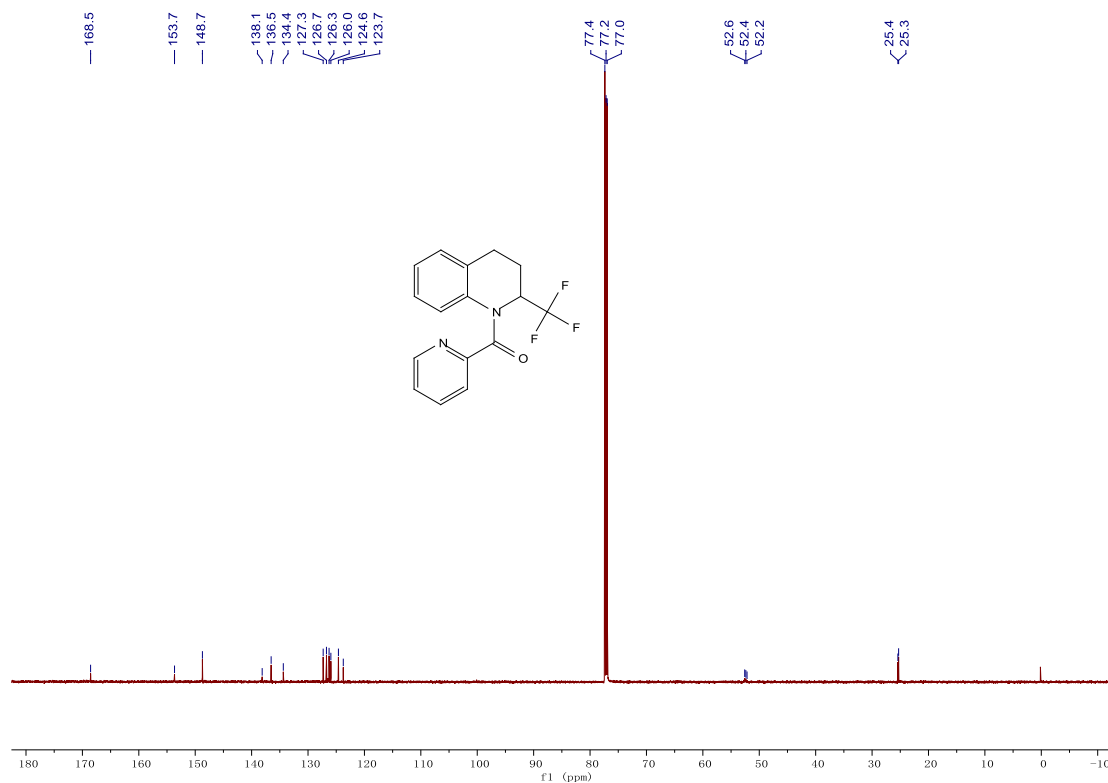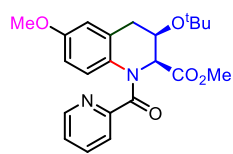

4a

**4a** <sup>1</sup>H NMR

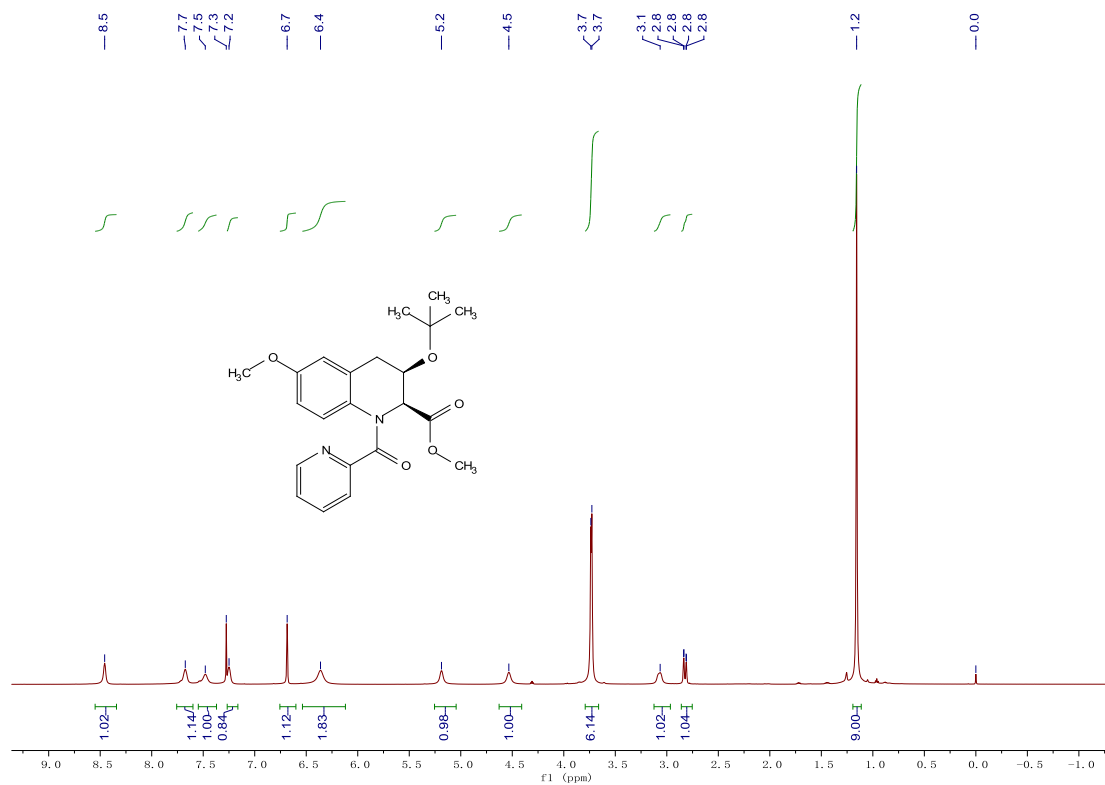

**4a** <sup>13</sup>C NMR

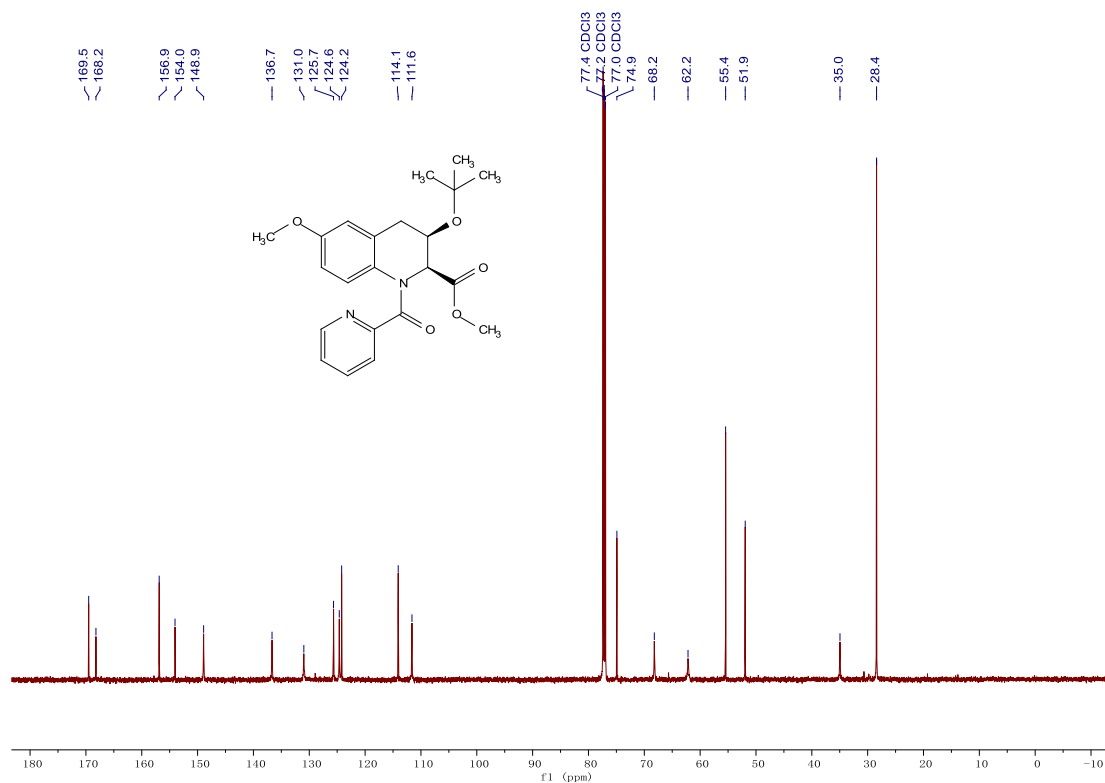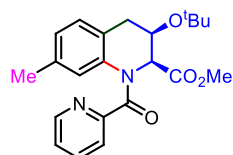

**4b**

### 4b <sup>1</sup>H NMR

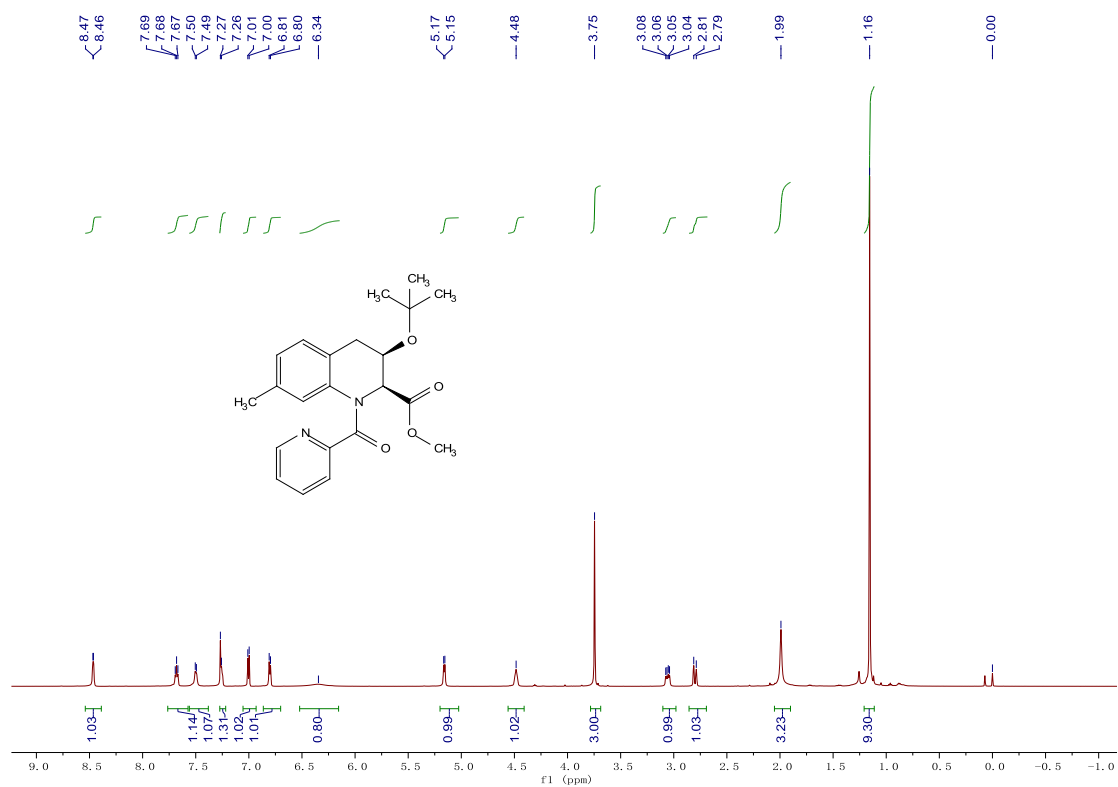

### 4b <sup>13</sup>C NMR

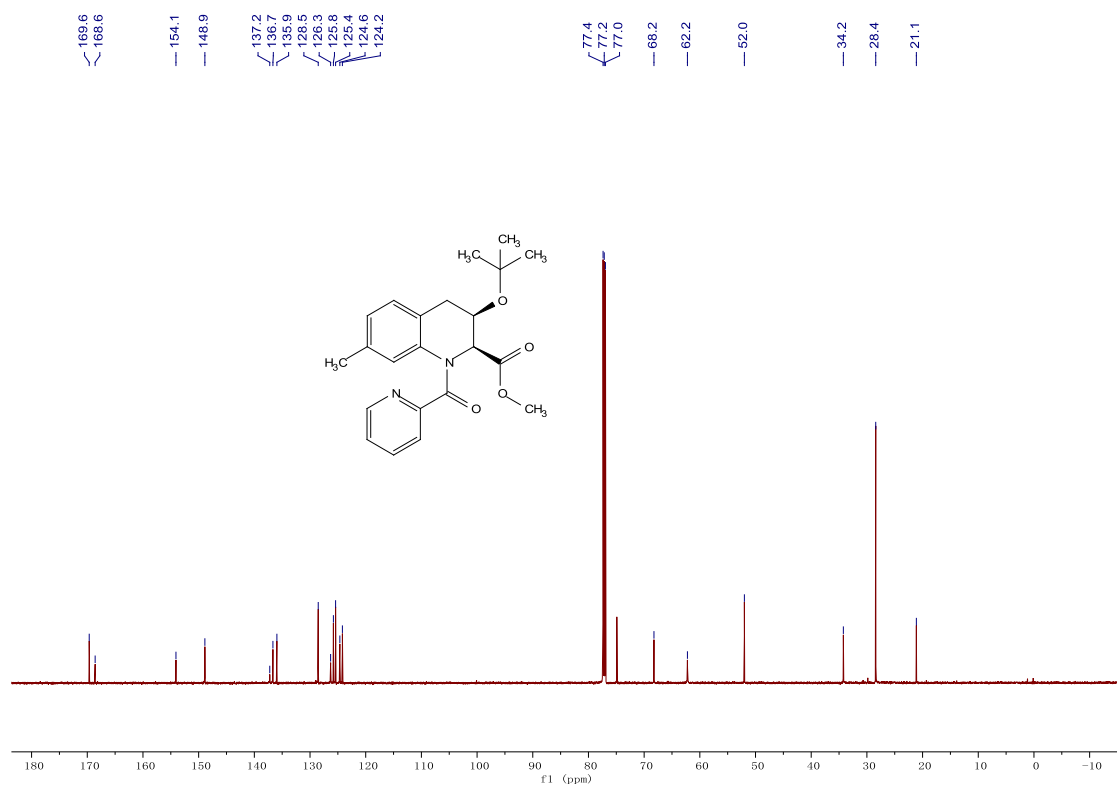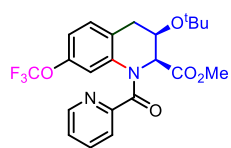

4c

### 4c <sup>1</sup>H NMR

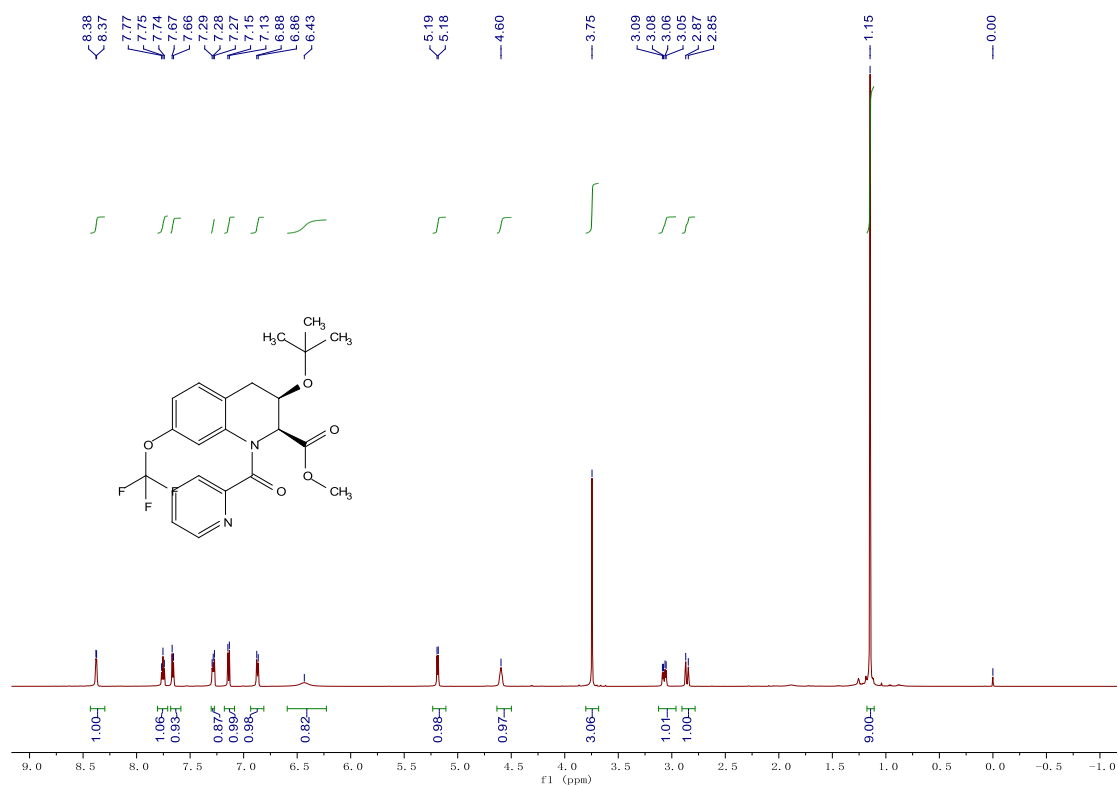

### 4c <sup>19</sup>F NMR

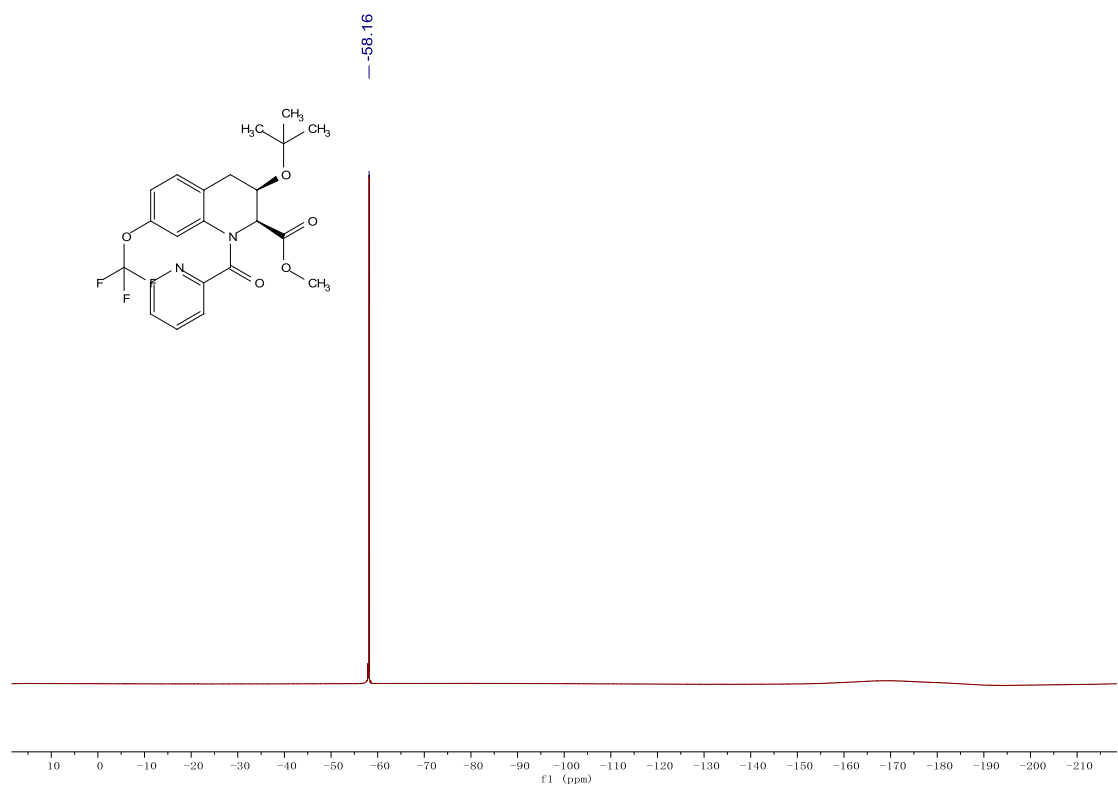

### 4c <sup>13</sup>C NMR

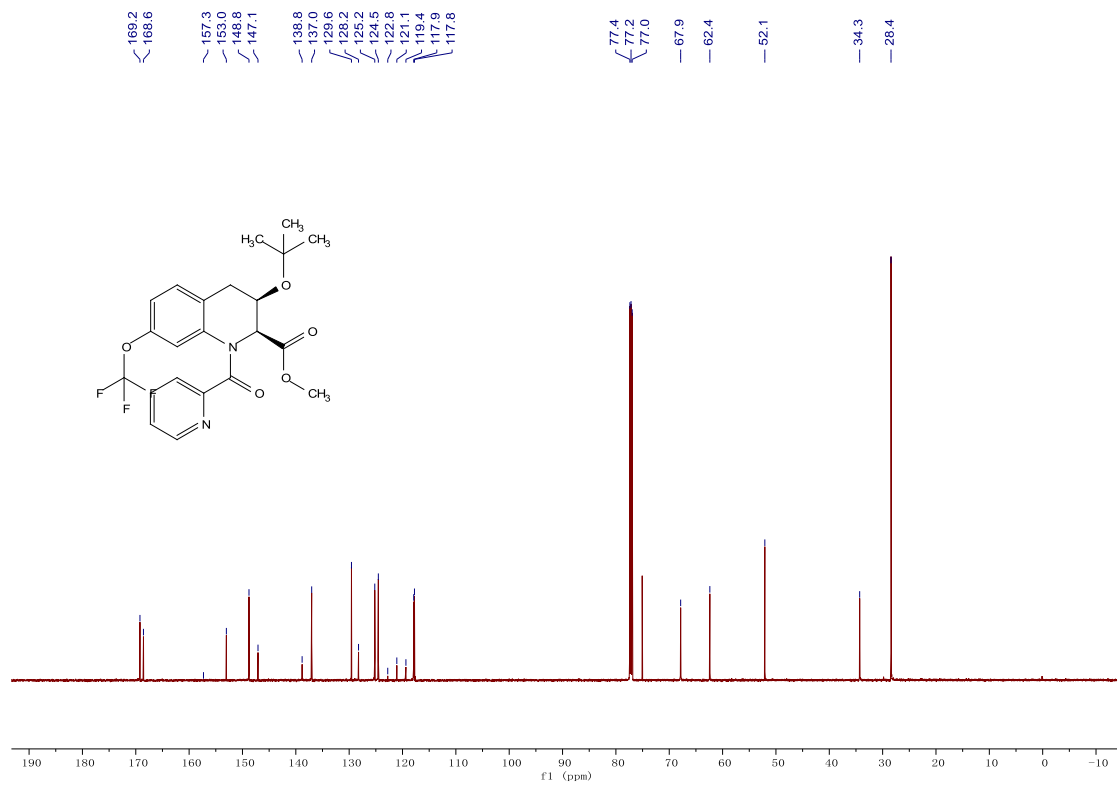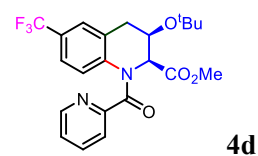

**4d** <sup>1</sup>H NMR

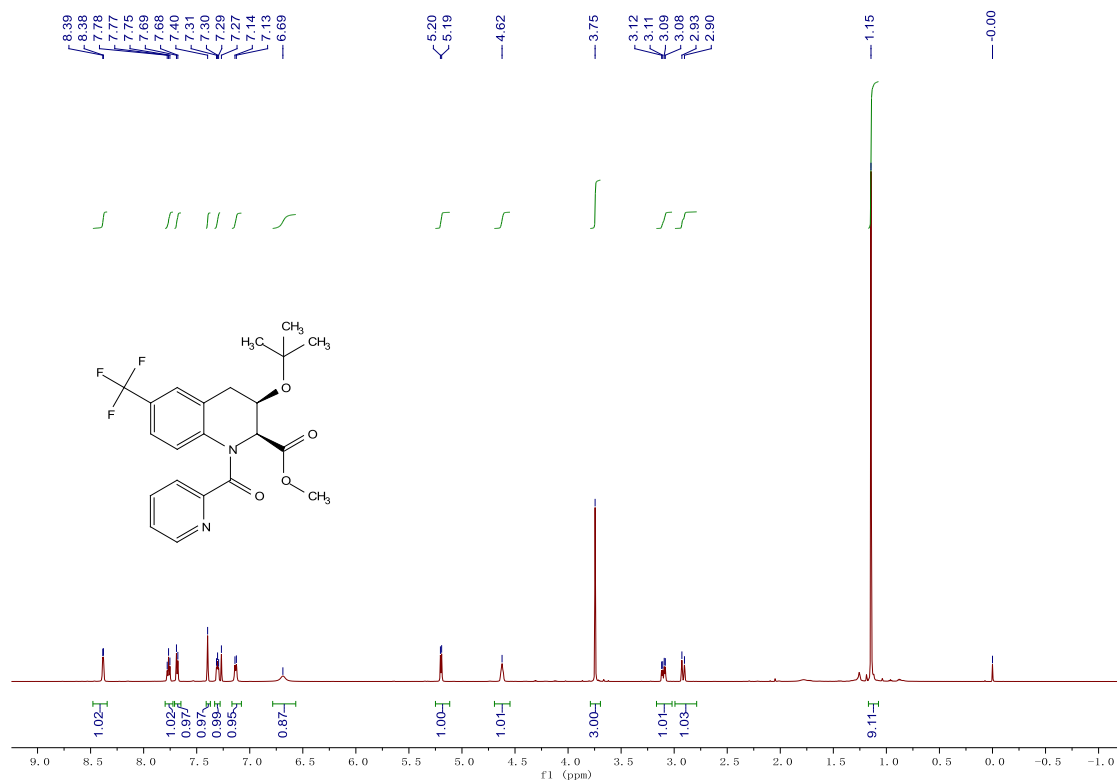

**4d** <sup>19</sup>F NMR

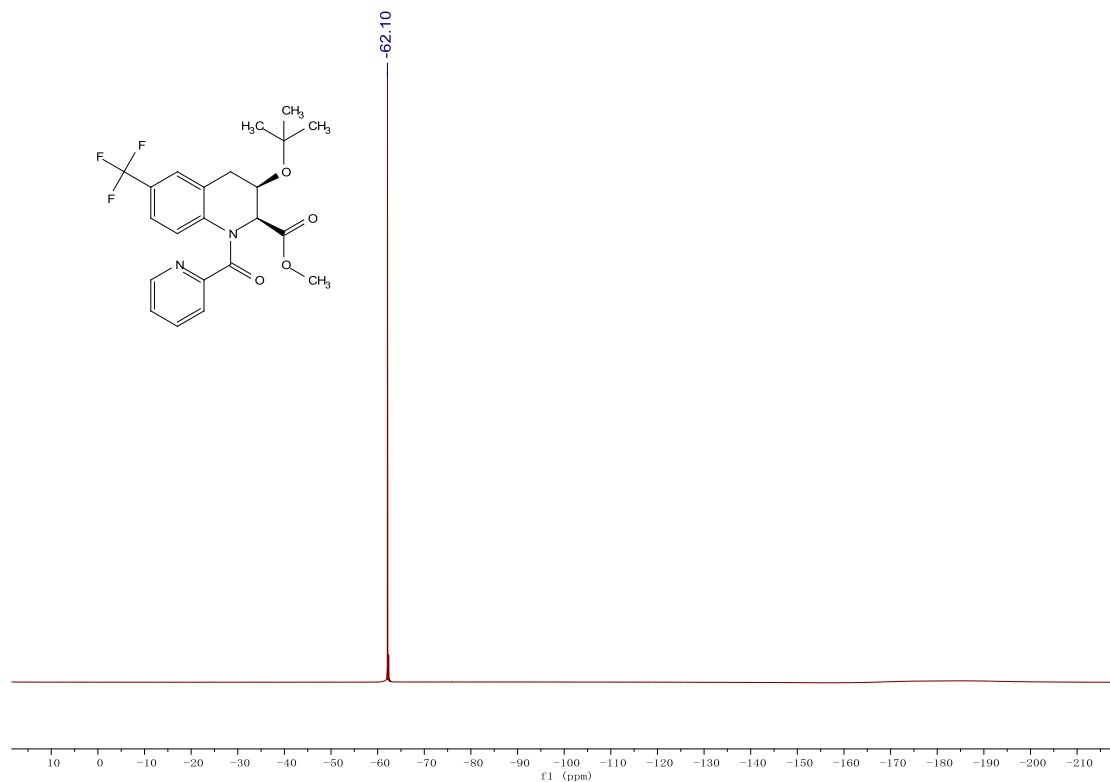

**4d**  $^{13}\text{C}$  NMR

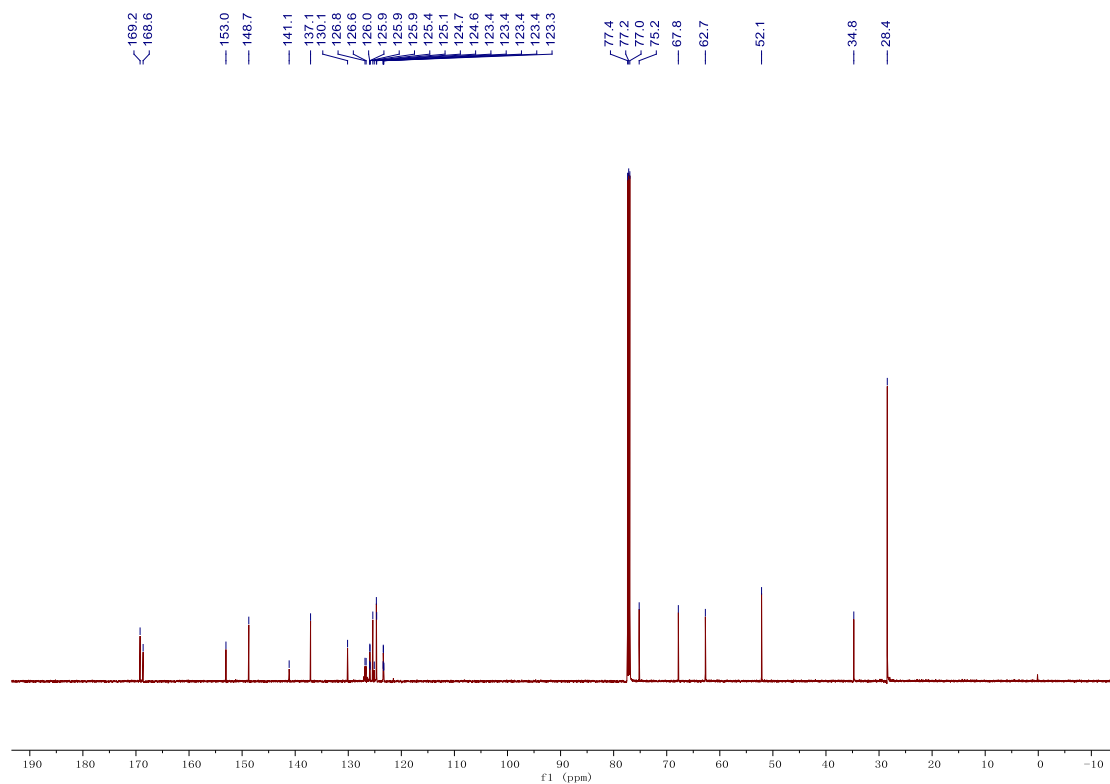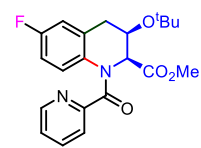

**4e**  $^1\text{H}$  NMR

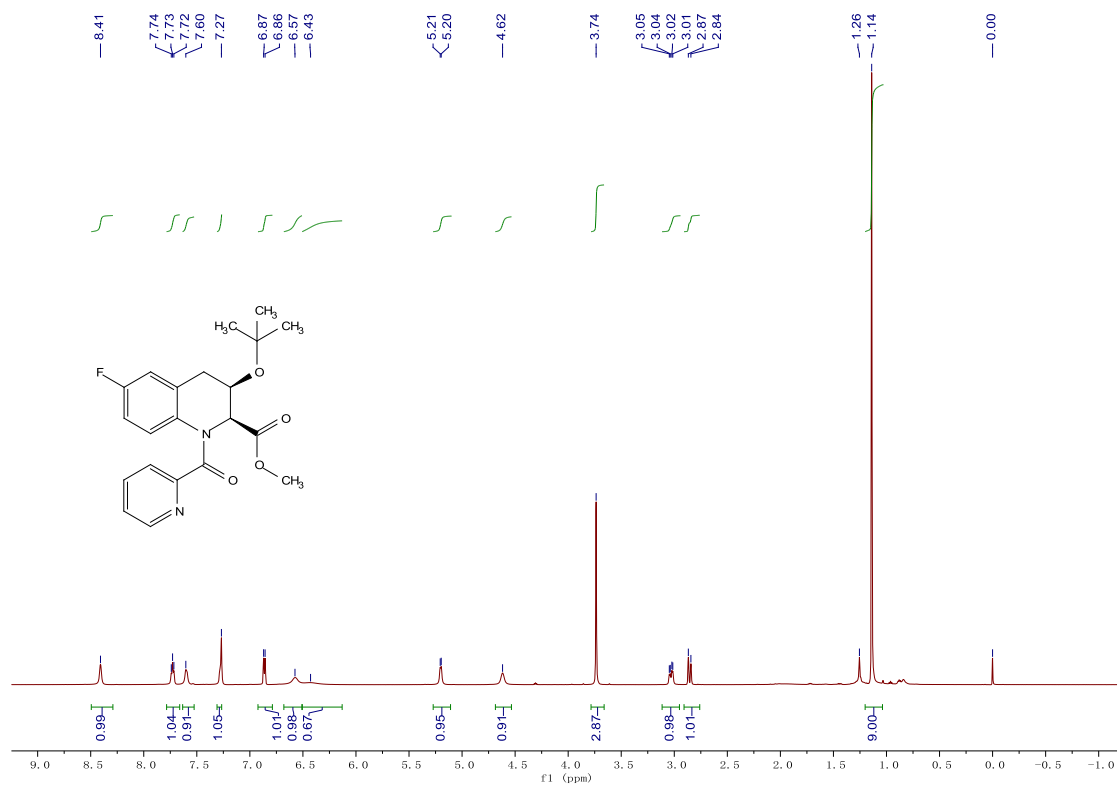

4e <sup>19</sup>F NMR

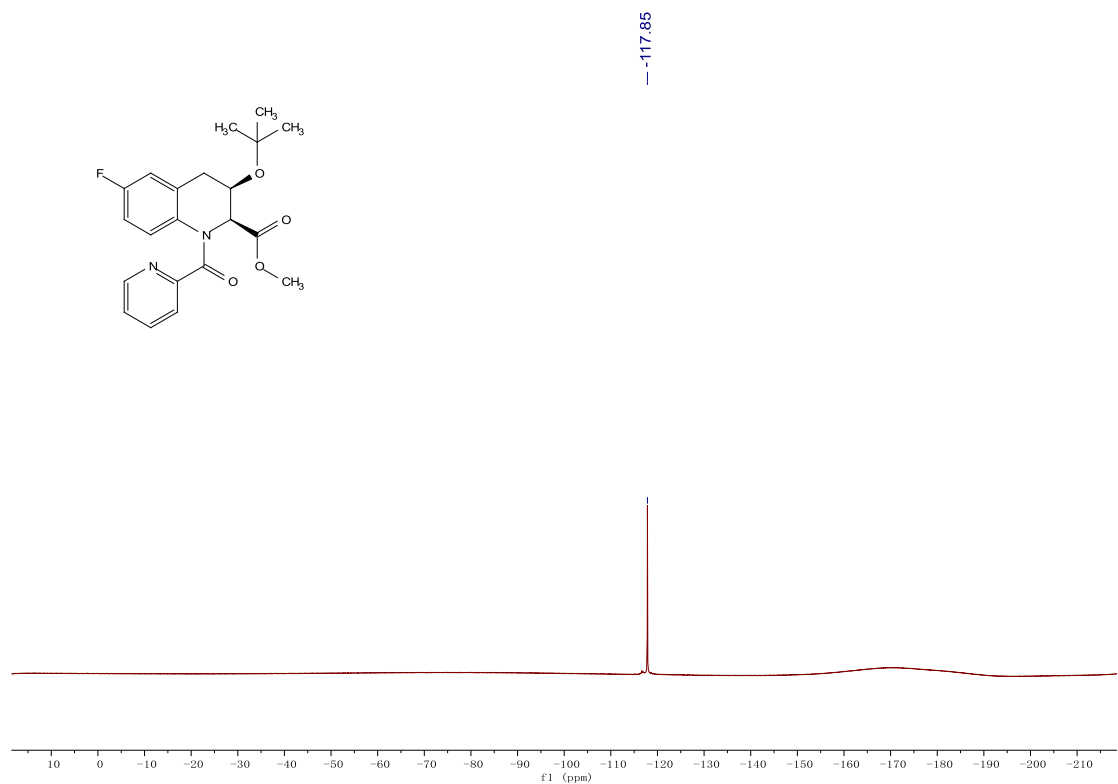

4e <sup>13</sup>C NMR



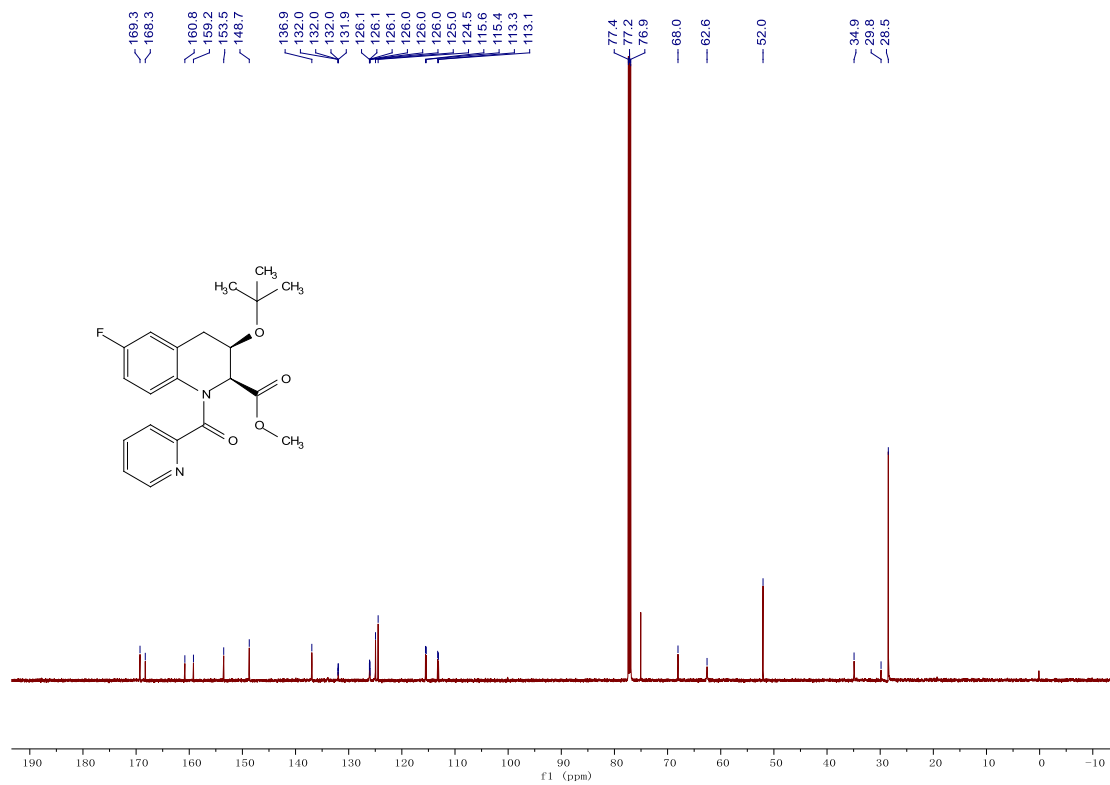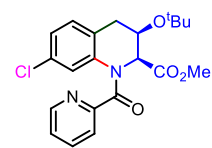

**4f**

**4f** <sup>1</sup>H NMR

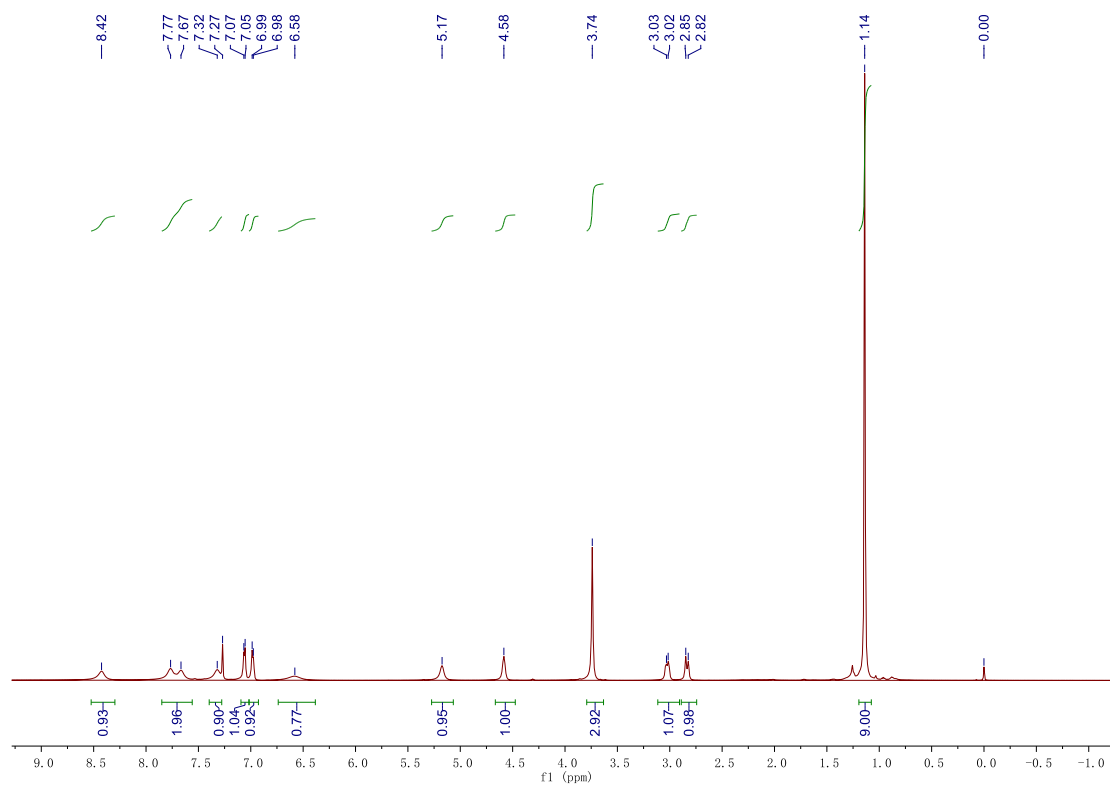

**4f**  $^{13}\text{C}$  NMR

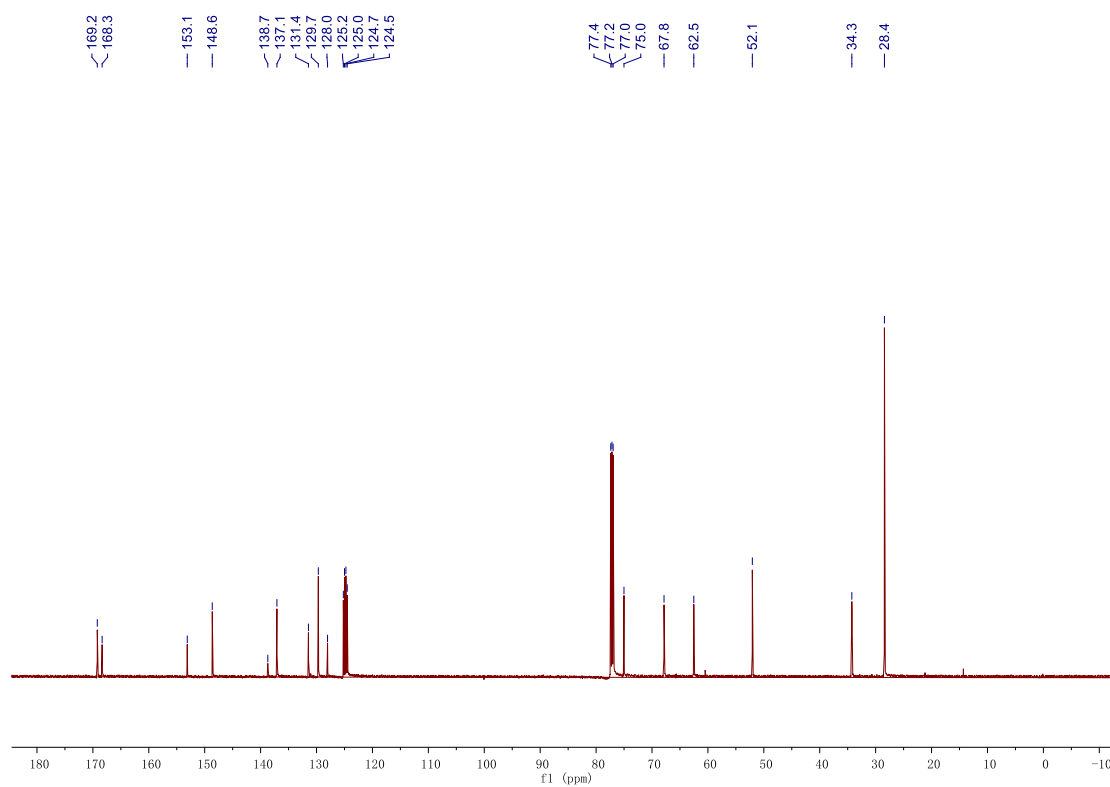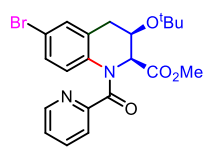

**4g**

**4g**  $^1\text{H}$  NMR

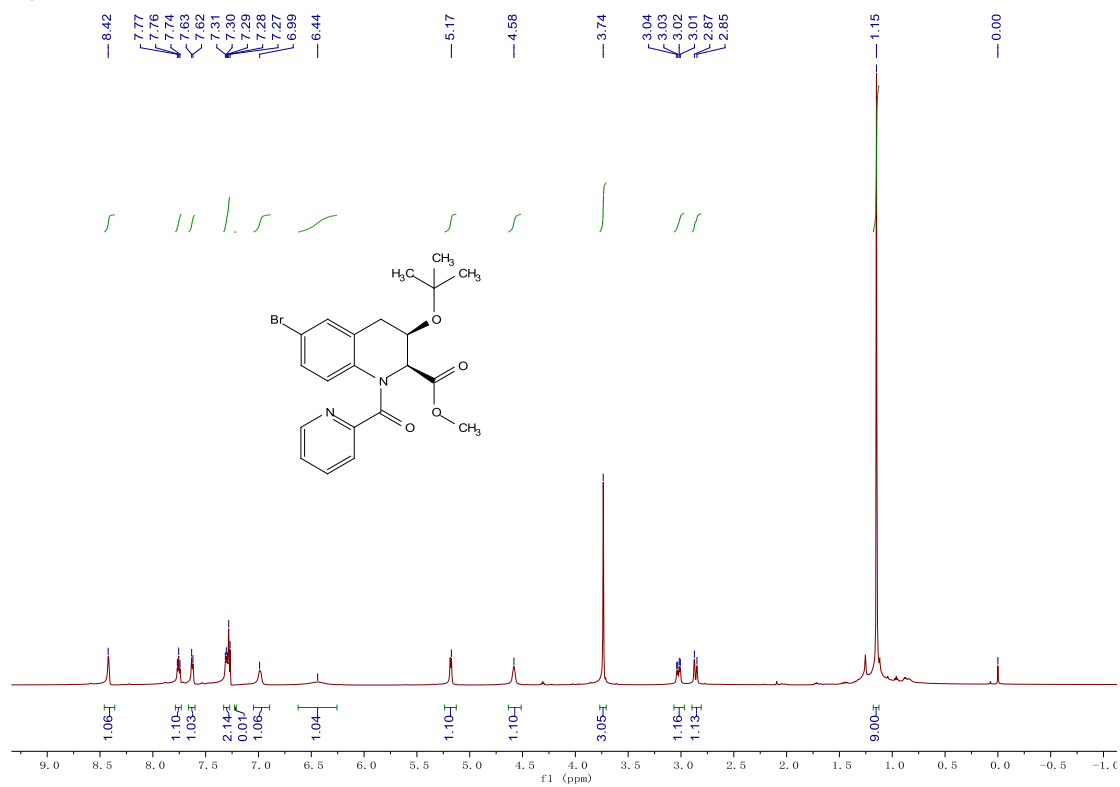

### 4g <sup>13</sup>C NMR

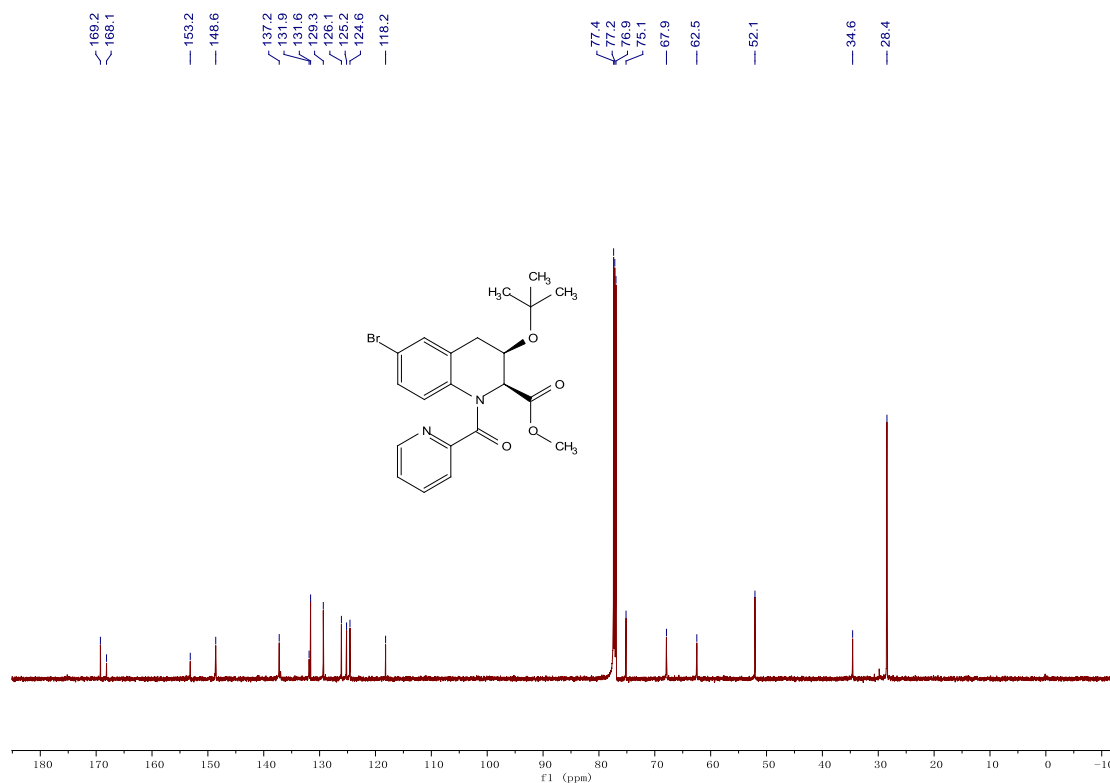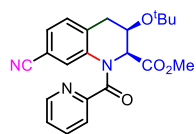

4h

### 4h <sup>1</sup>H NMR

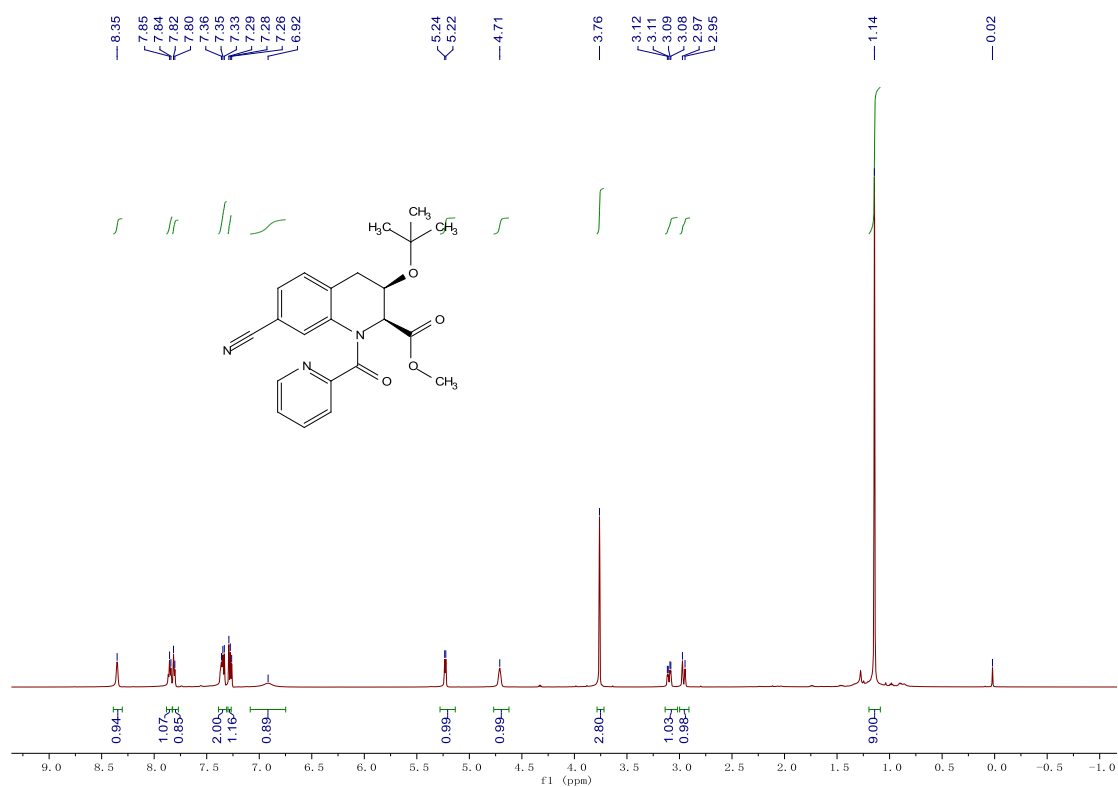

### 4h <sup>13</sup>C NMR

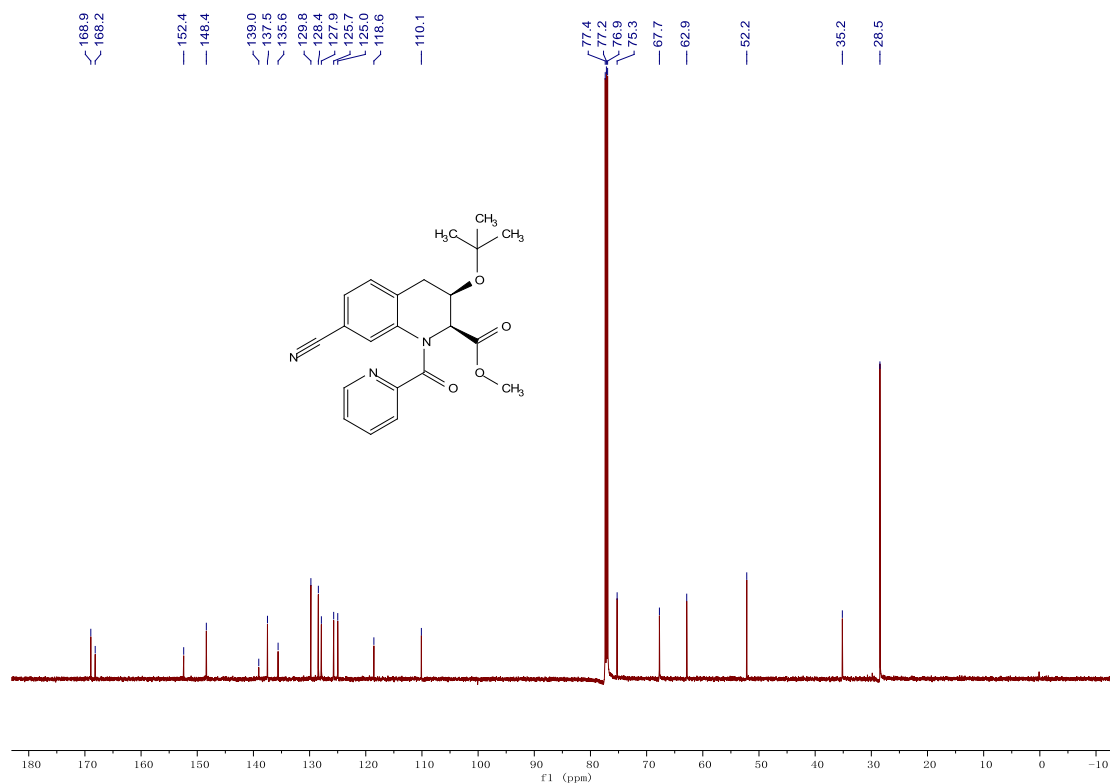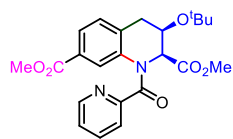

4i

### 4i <sup>1</sup>H NMR

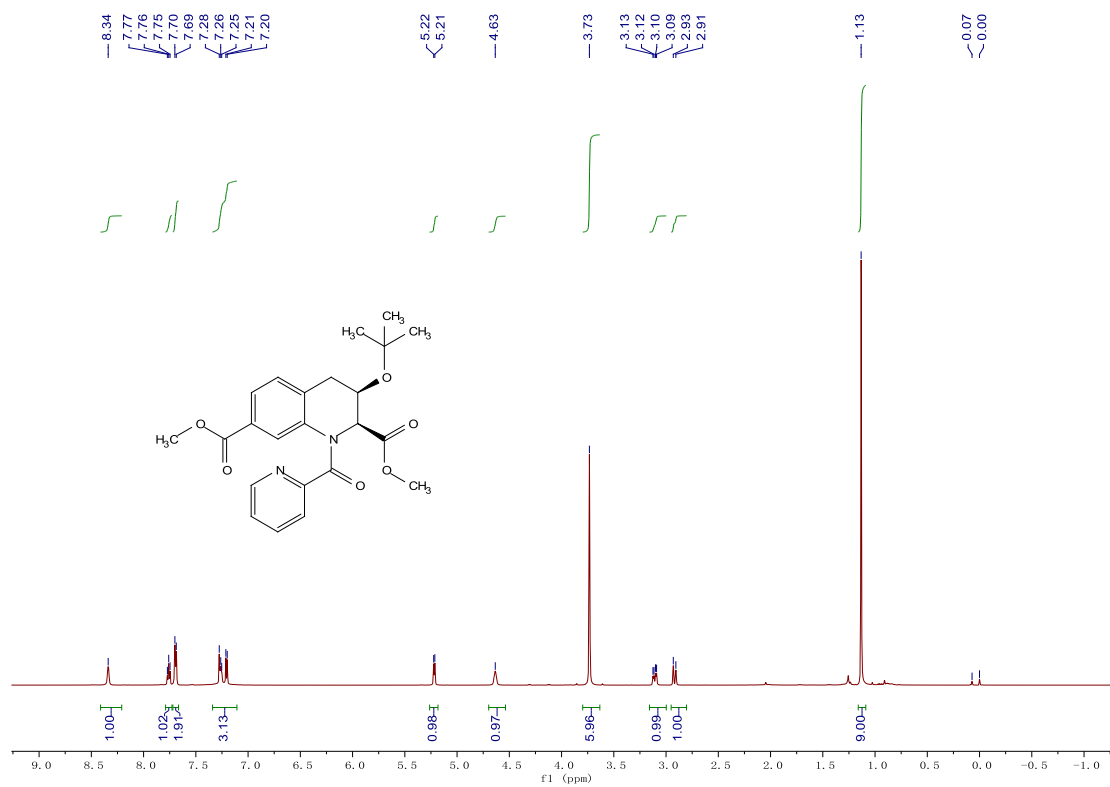

**4i** <sup>13</sup>C NMR

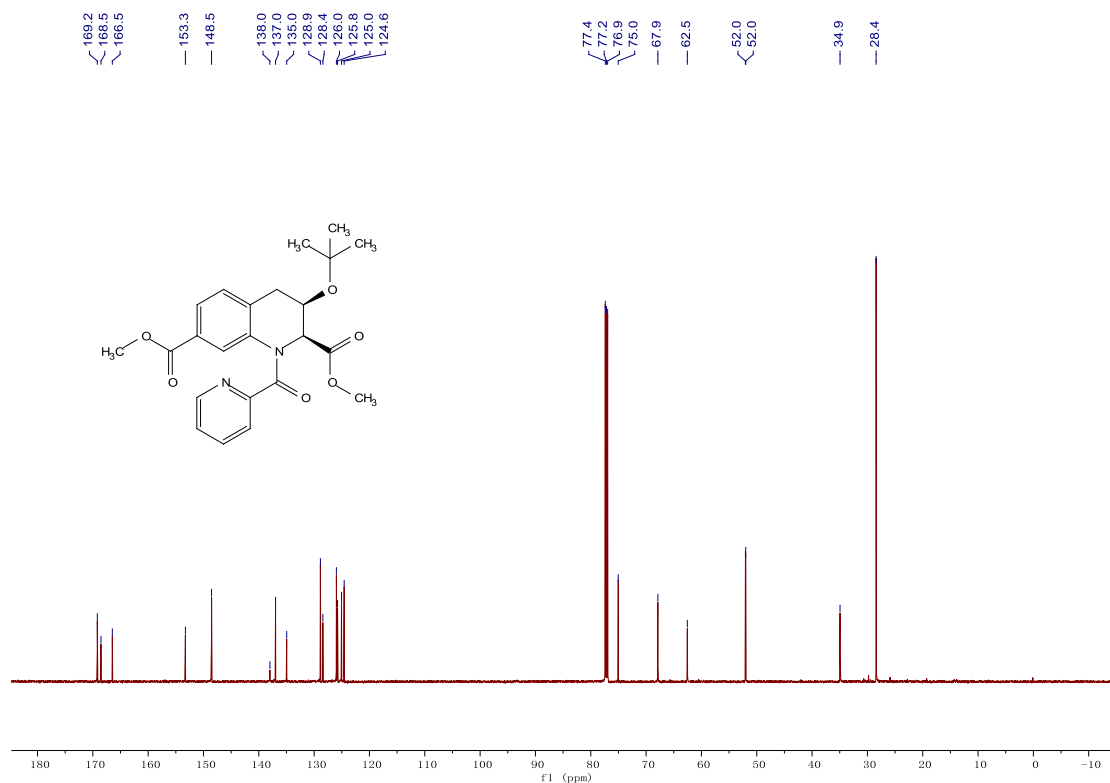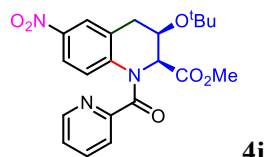

**4j**

**4j** <sup>1</sup>H NMR

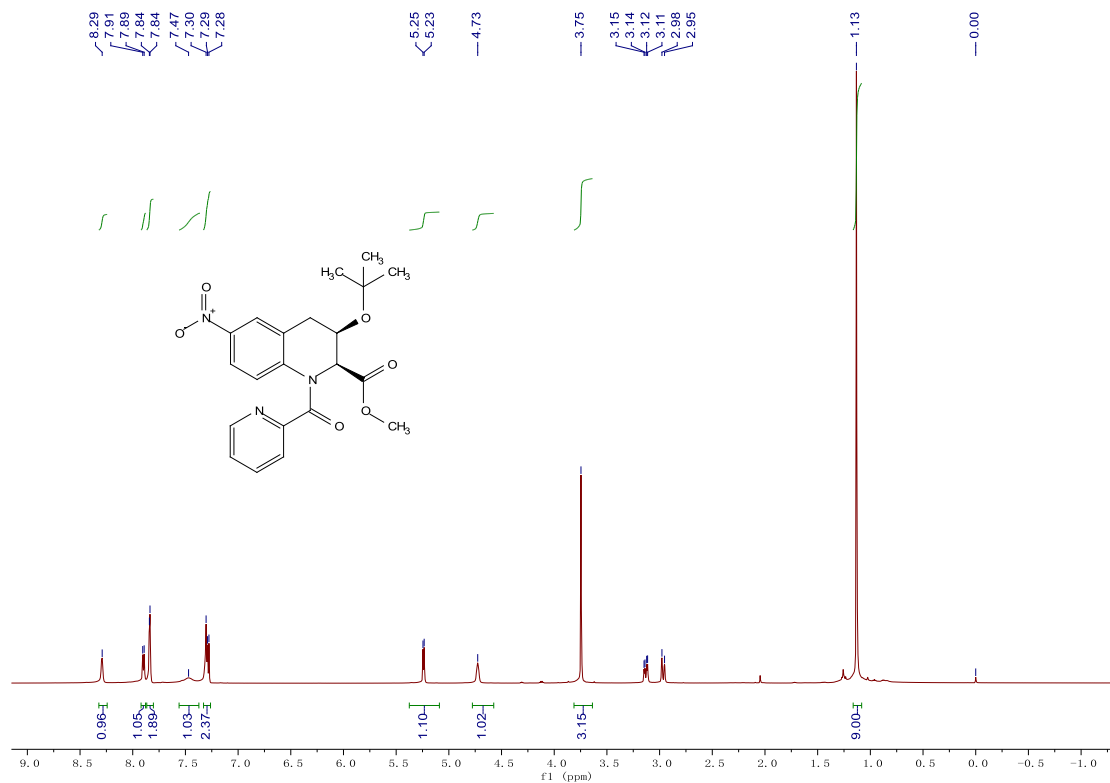

### 4j <sup>13</sup>C NMR

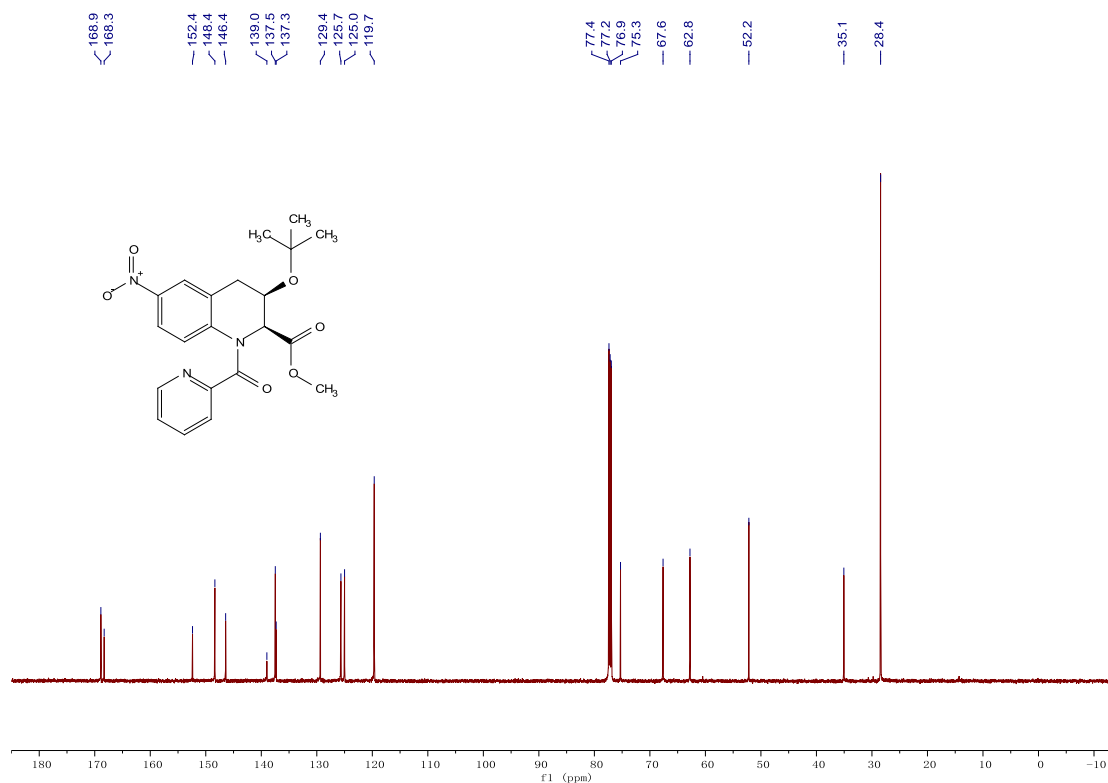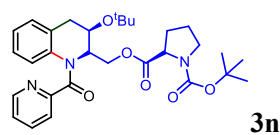

### 3n <sup>1</sup>H NMR

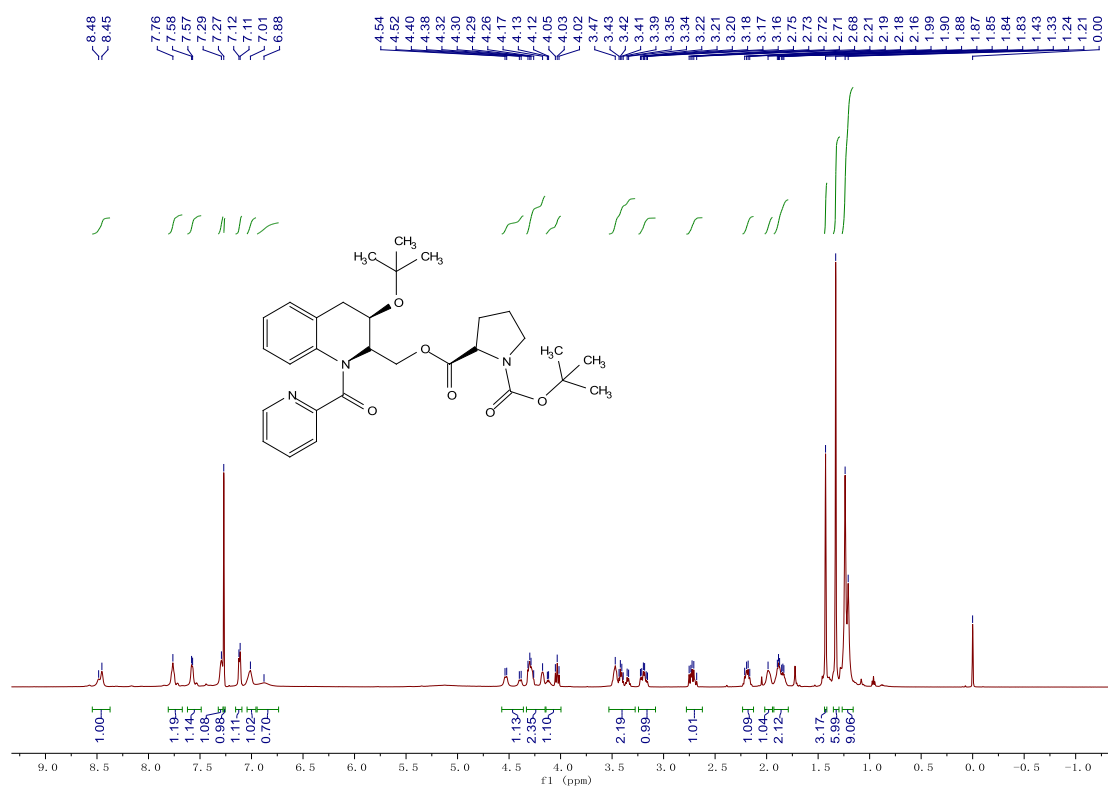

### 3n <sup>13</sup>C NMR

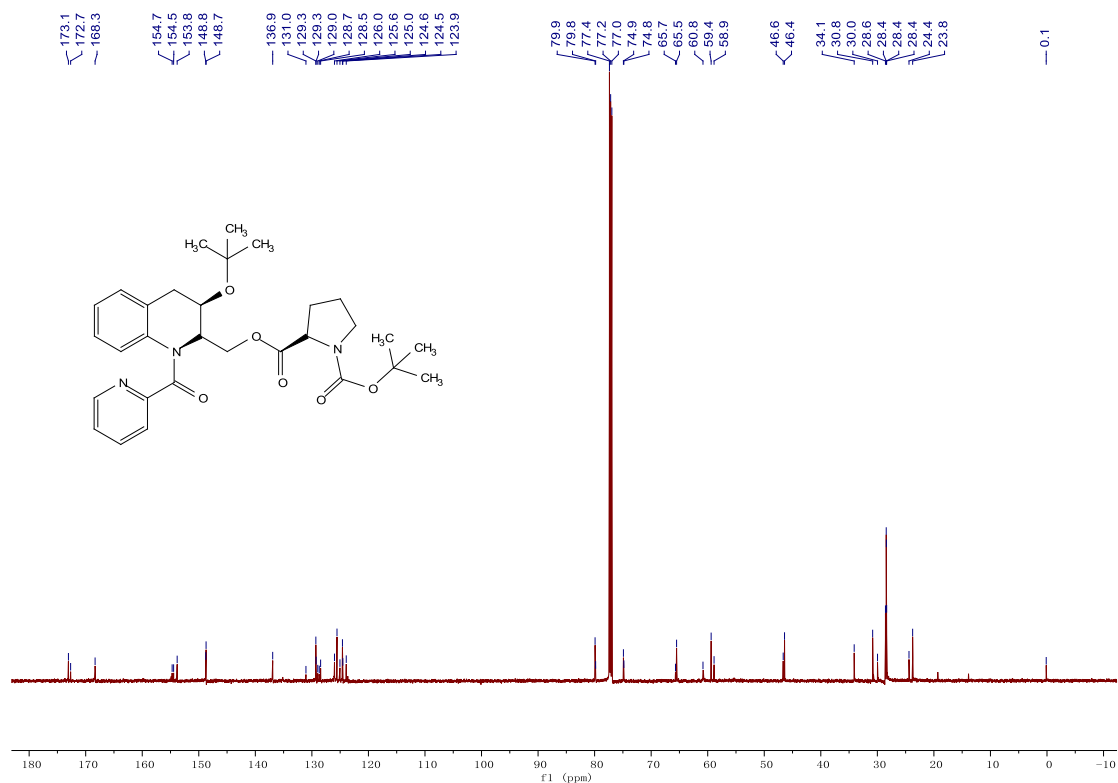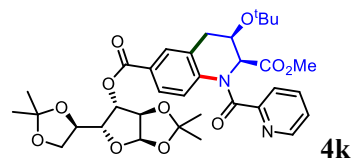

### 4k <sup>1</sup>H NMR

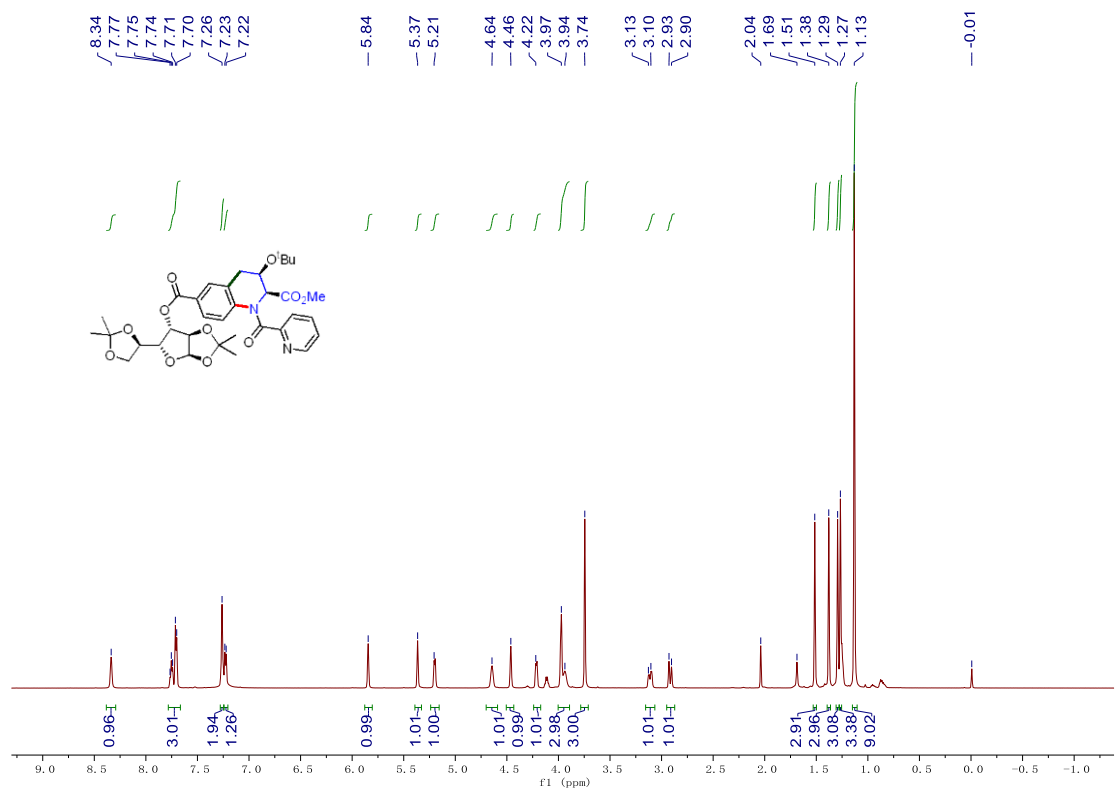

**4k**  $^{13}\text{C}$  NMR

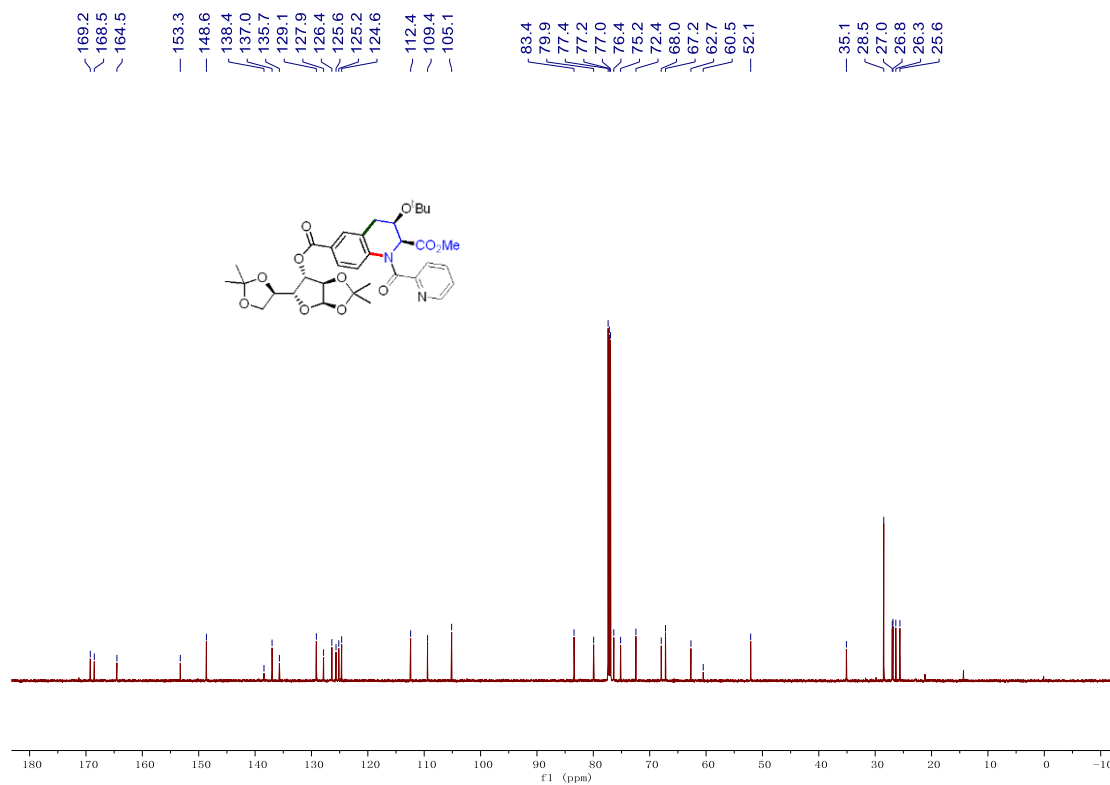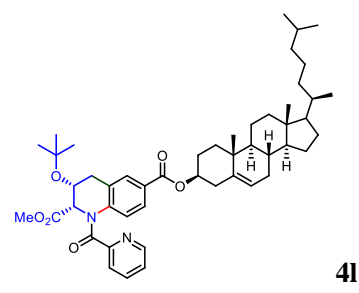

**4l**  $^1\text{H}$  NMR



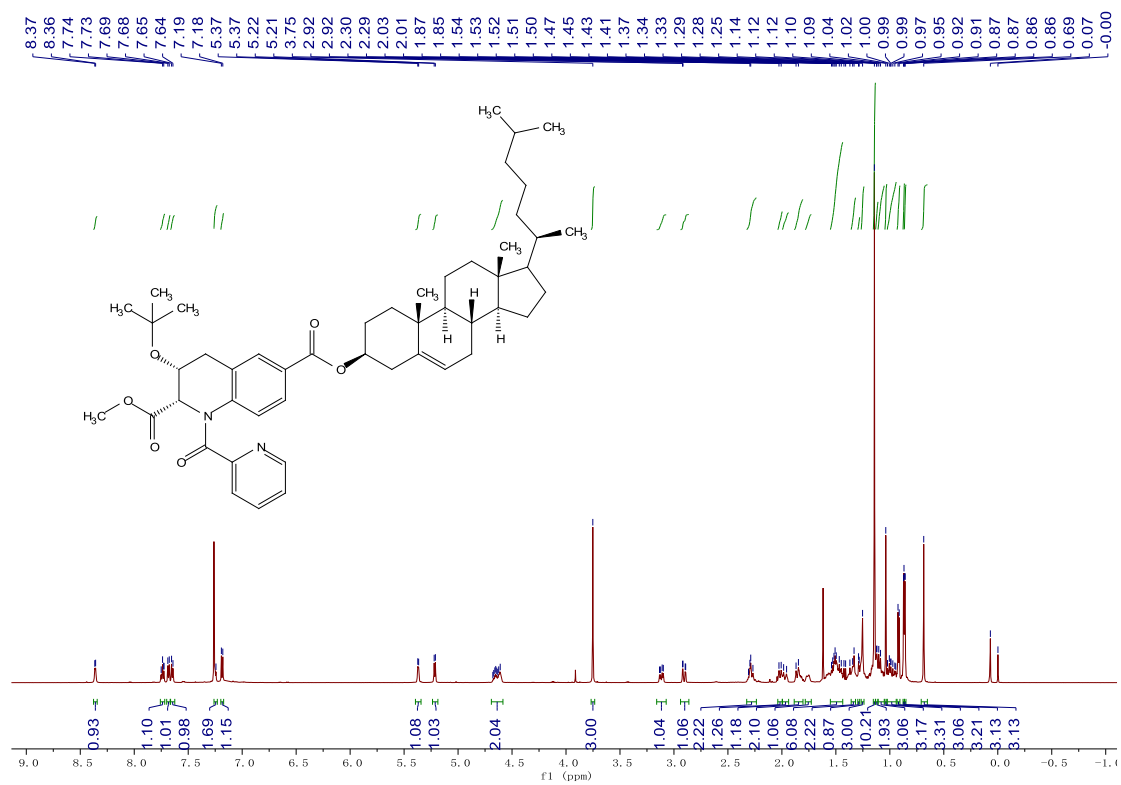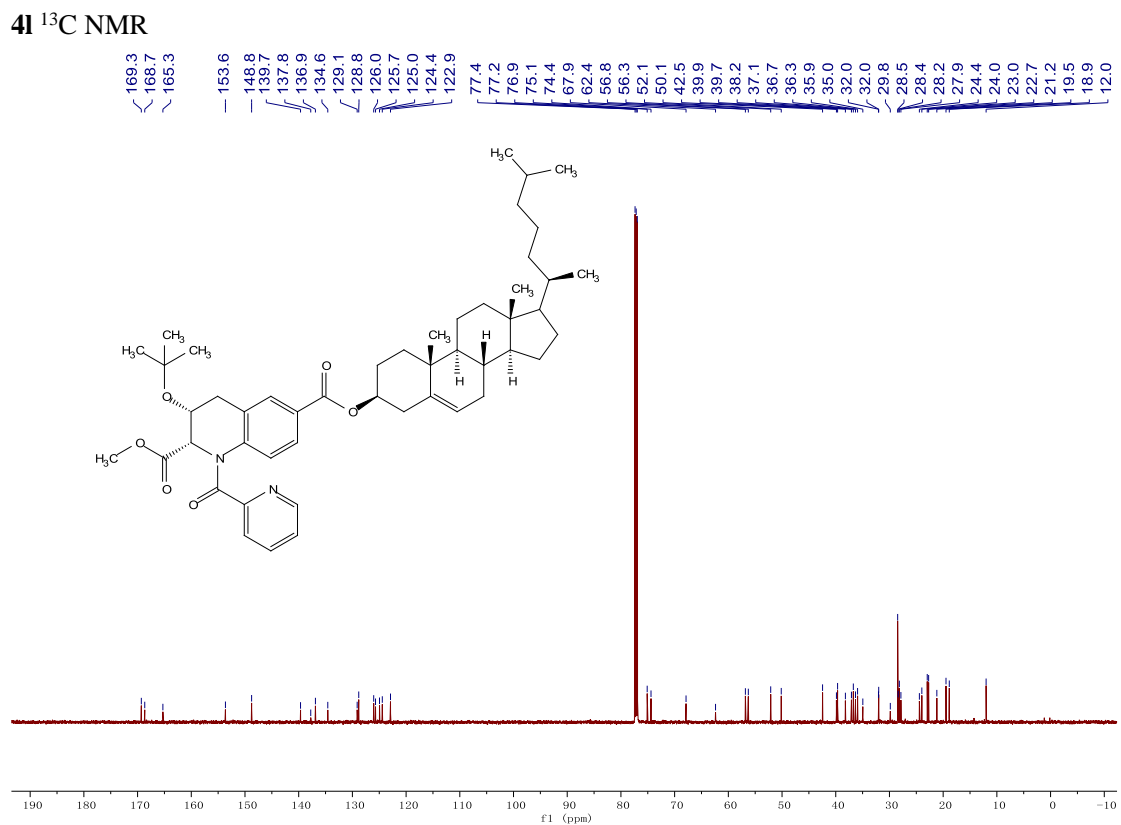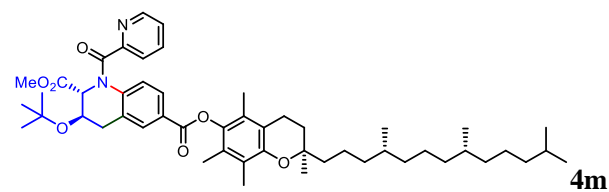

### 4m <sup>1</sup>H NMR

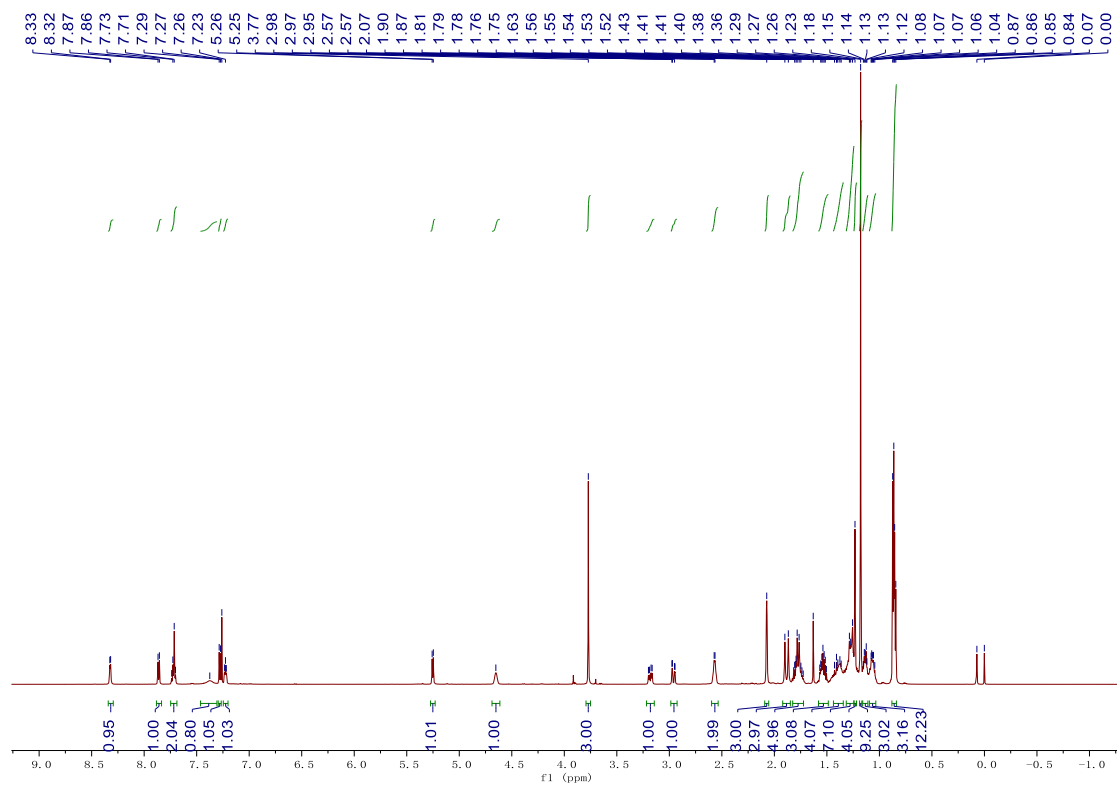

### 4m <sup>13</sup>C NMR

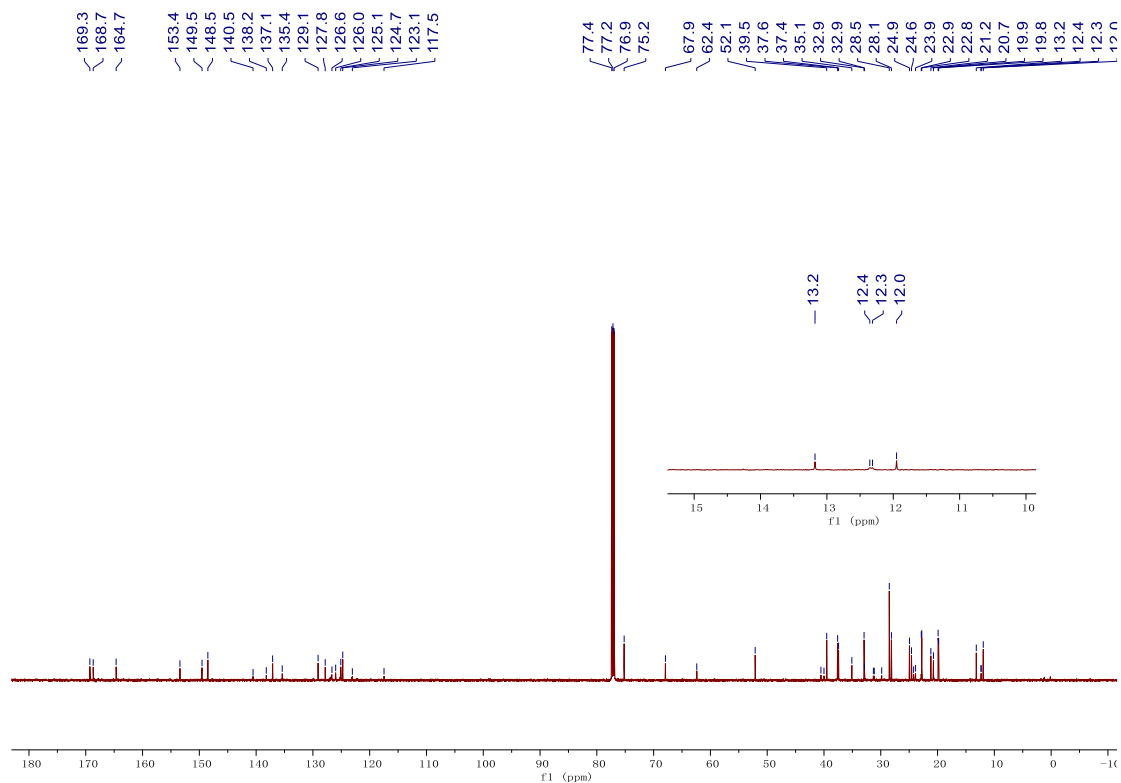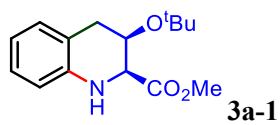

### 3a-1 <sup>1</sup>H NMR

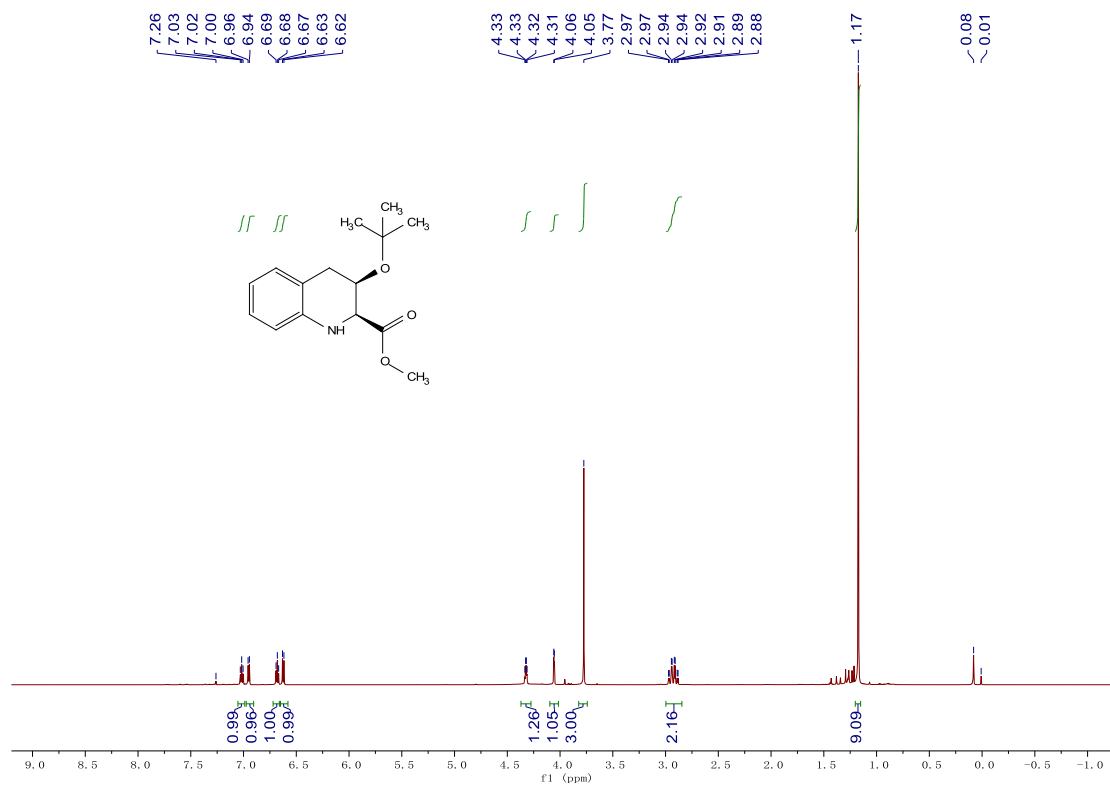

**3a-1 <sup>13</sup>C NMR**

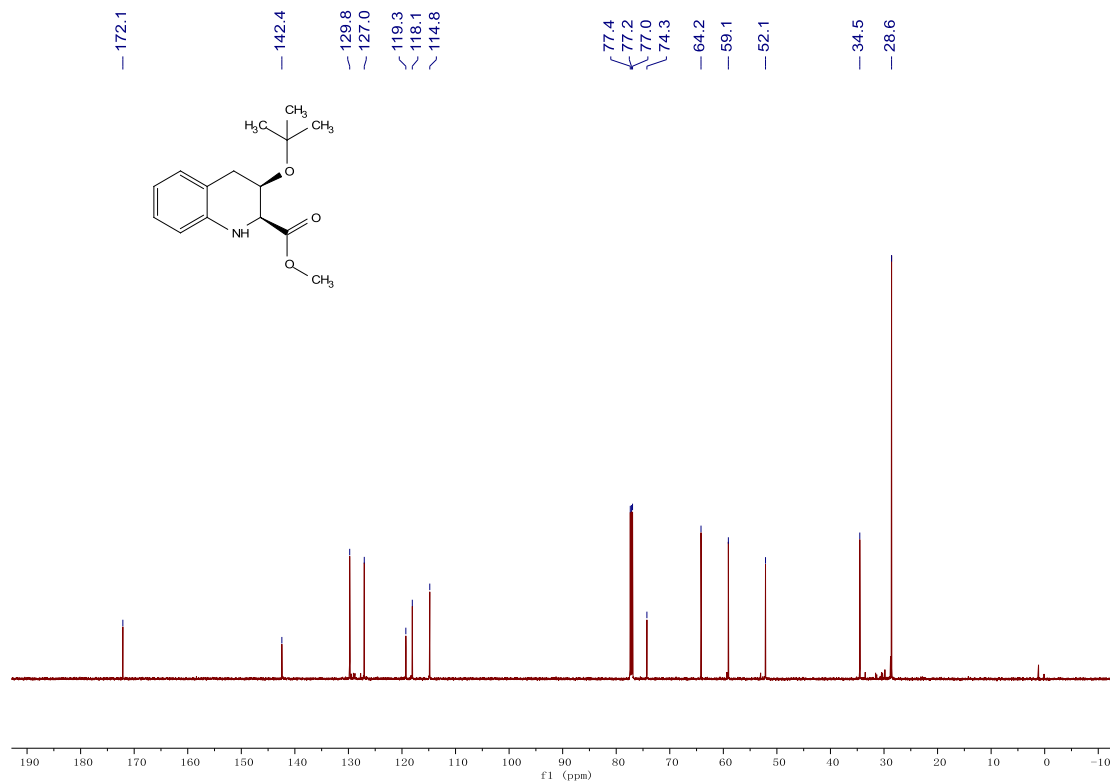

**X HPLC spectra**

3a, OJ-3, Hex/iPrOH = 80/20, rate = 0.5 mL/min, 254 nm

2022/12/12 16:01:18 1 / 1

==== Shimadzu LabSolutions 分析报告 ====

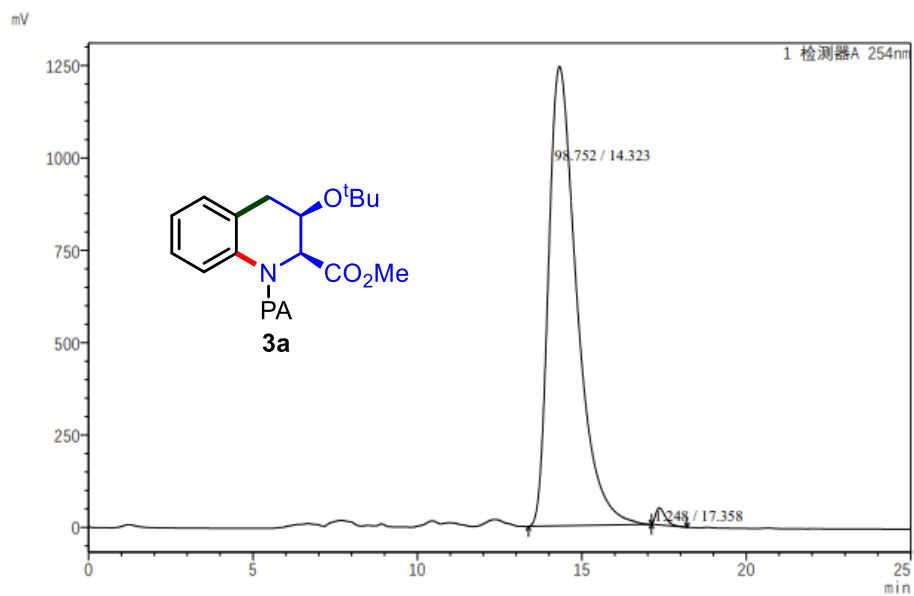

D:\zymzdx\212-S.lcd

3a-R, OJ-3, Hex/iPrOH = 80/20, rate = 0.5 mL/min, 254 nm

2022/12/12 16:01:11 1 / 1

==== Shimadzu LabSolutions 分析报告 ====

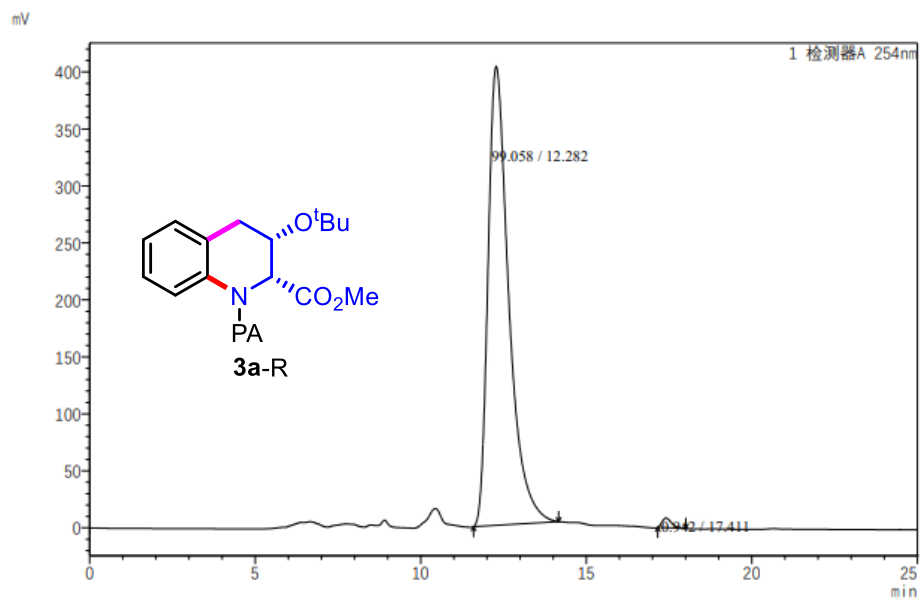

D:\zymzdx\2\2-R.lcd

3a-R+3a (1:1), OJ-3, Hex/iPrOH = 80/20, rate = 0.5 mL/min, 254 nm

2022/12/12 16:01:24 1 / 1

==== Shimadzu LabSolutions 分析报告 ====

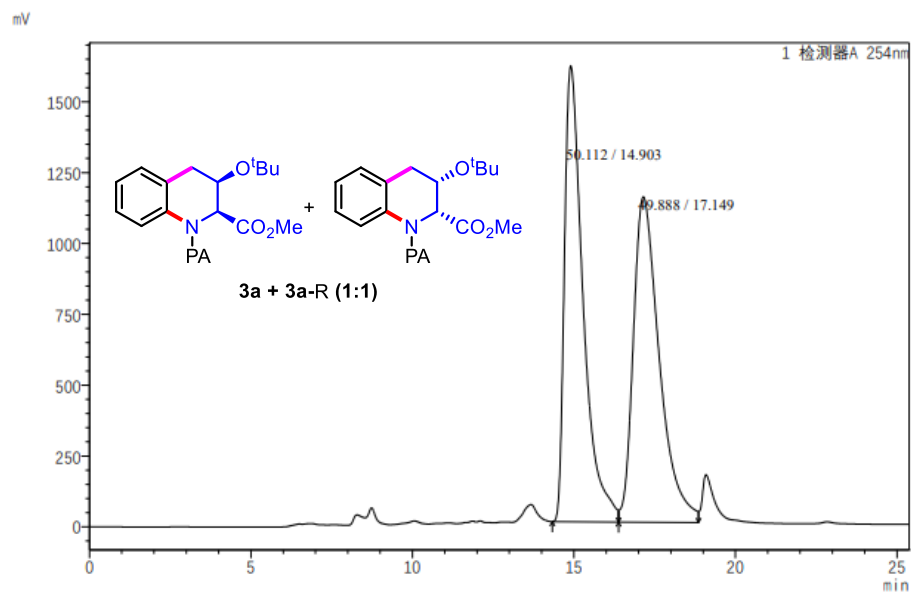

D:\zymzdx\2\2-SR.lcd

1a IB-N5, Hex/iPrOH = 80/20, rate = 1 mL/min, 254 nm

2022/12/11 21:45:09 1 / 1

==== Shimadzu LabSolutions 分析报告 ====

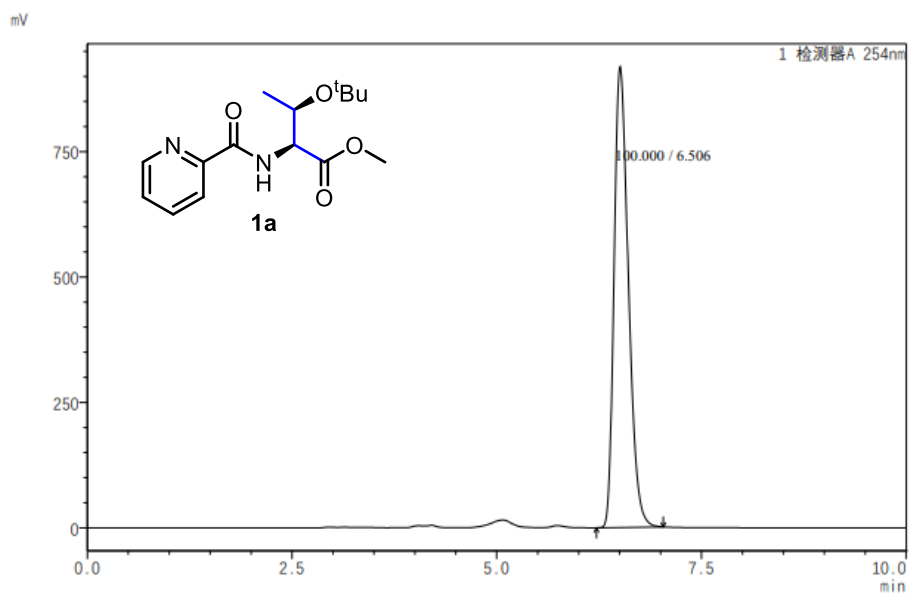

D:\zymzdx\2-S and 2-Y-SR\2-Y-S.lcd

1a-R, IB-N5, Hex/iPrOH = 80/20, rate = 1 mL/min, 254 nm

2022/12/11 21:45:18 1 / 1

==== Shimadzu LabSolutions 分析报告 ====

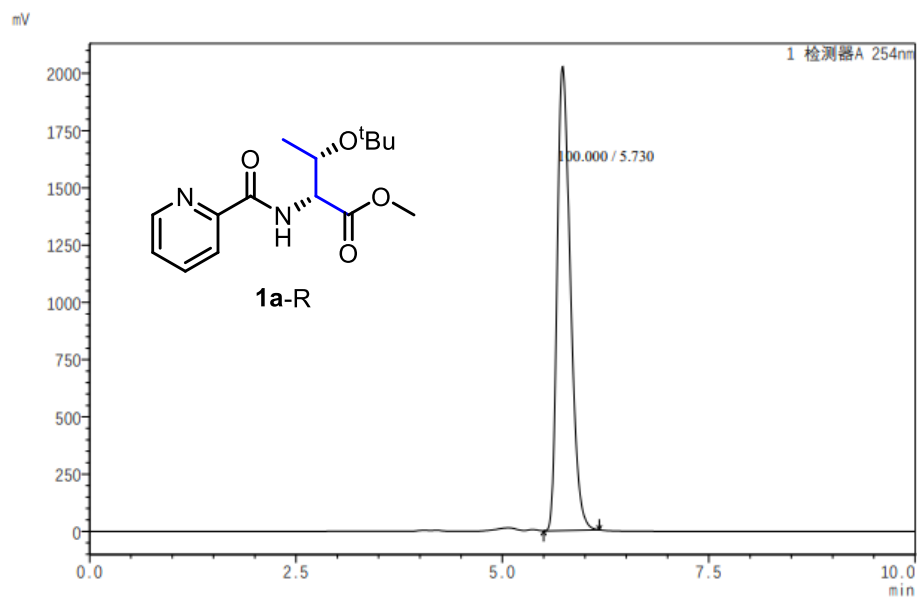

D:\zymzdx\2-S and 2-Y-SR\2-Y-R.lcd



1a-R+1a (1:1), IB-N5, Hex/iPrOH = 80/20, rate = 1 mL/min, 254 nm

2022/12/11 21:30:28 1 / 1

==== Shimadzu LabSolutions 分析报告 ====

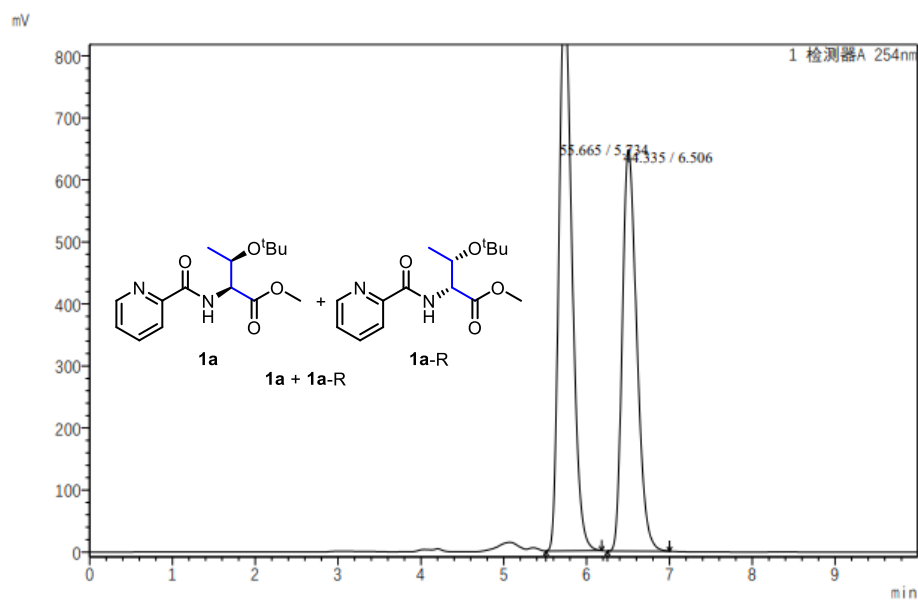

D:\zymzdx12-S and 2-Y-SR\2-Y-SR.lcd

1c, IB-N5, Hex/iPrOH = 80/20, rate = 1 mL/min, 254 nm

2022/12/11 22:41:04 1 / 1

==== Shimadzu LabSolutions 分析报告 ====

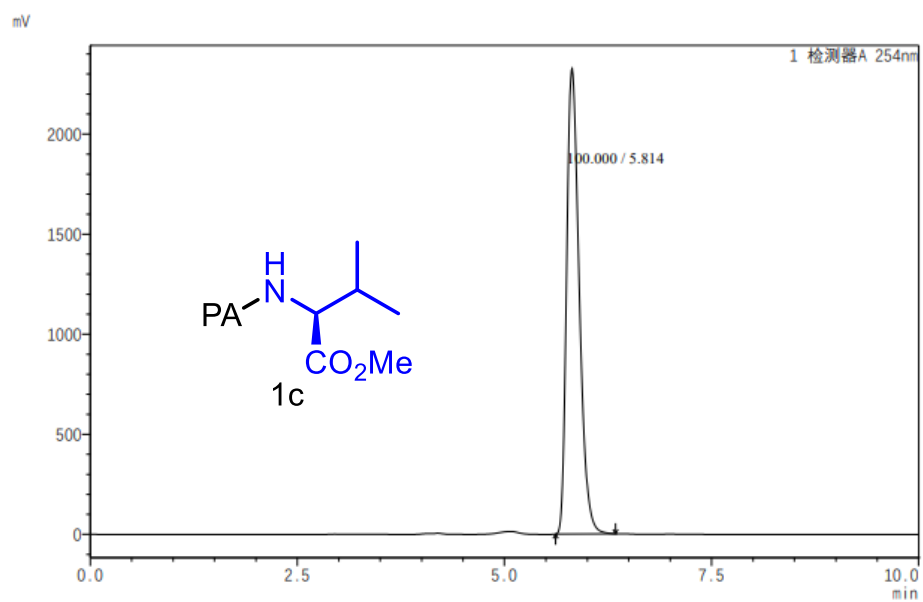

D:\zymzdx\3-Y\3-Y-L.lcd

1c-R, IB-N5, Hex/iPrOH = 80/20, rate = 1 mL/min, 254 nm

2022/12/11 22:24:33 1 / 1

==== Shimadzu LabSolutions 分析报告 ====

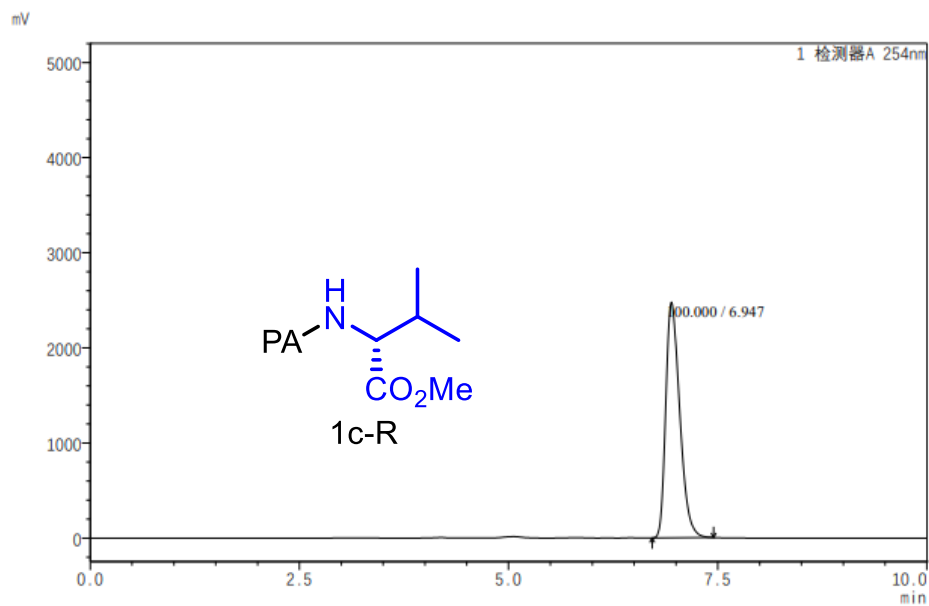

D:\zymzdx\3-Y\3-Y-D.lcd

1c+1c-R, IB-N5, Hex/iPrOH = 80/20, rate = 1 mL/min, 254 nm

2022/12/11 22:24:41 1 / 1

==== Shimadzu LabSolutions 分析报告 ====

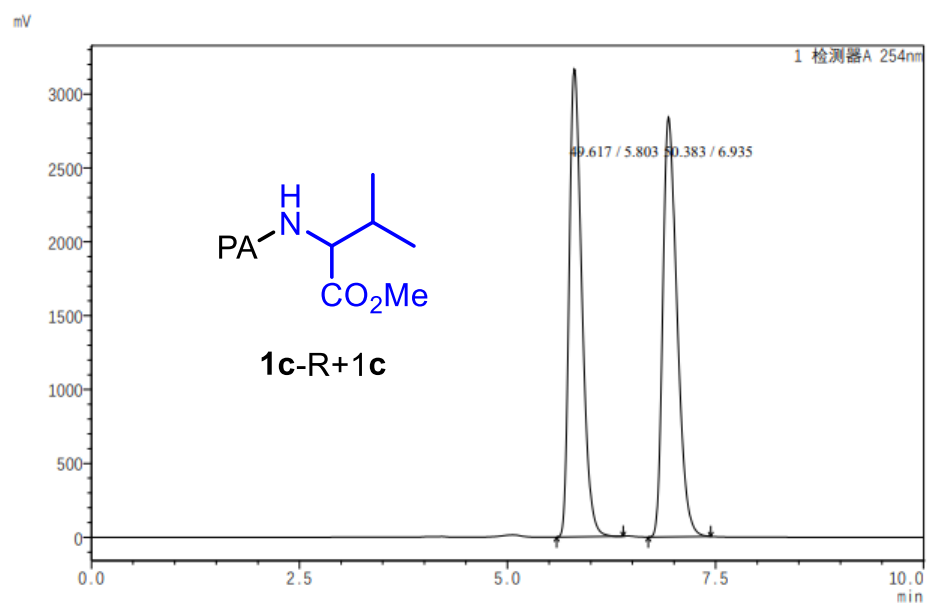

D:\zymzdx\13-Y\13-Y-DL.lcd

3c, IB-N5, Hex/iPrOH = 80/20, rate = 1 mL/min, 254 nm

2022/12/12 12:55:50 1 / 1

==== Shimadzu LabSolutions 分析报告 ====

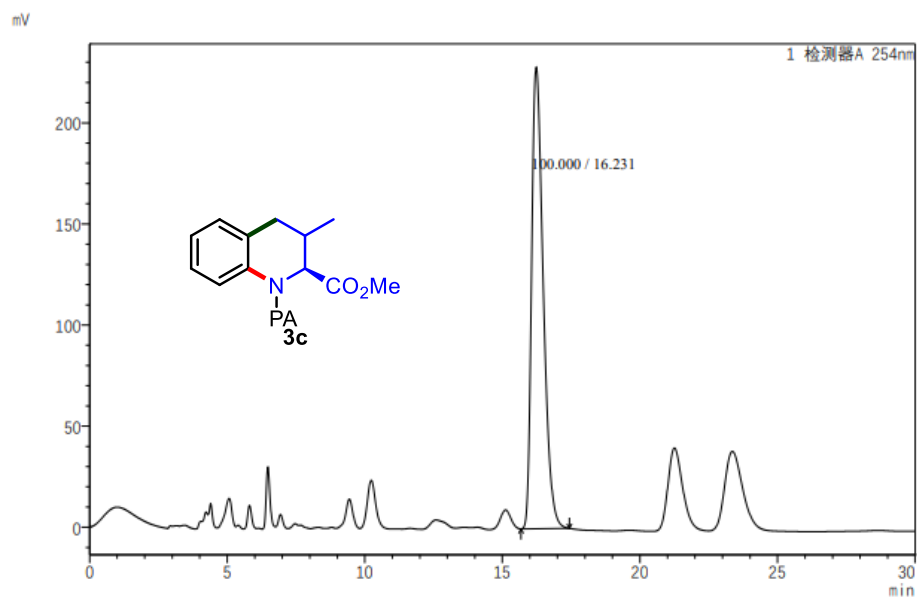

D:\zymzdx\3\3-L.lcd

3c-R, IB-N5, Hex/iPrOH = 80/20, rate = 1 mL/min, 254 nm

2022/12/12 12:56:04 1 / 1

==== Shimadzu LabSolutions 分析报告 ====

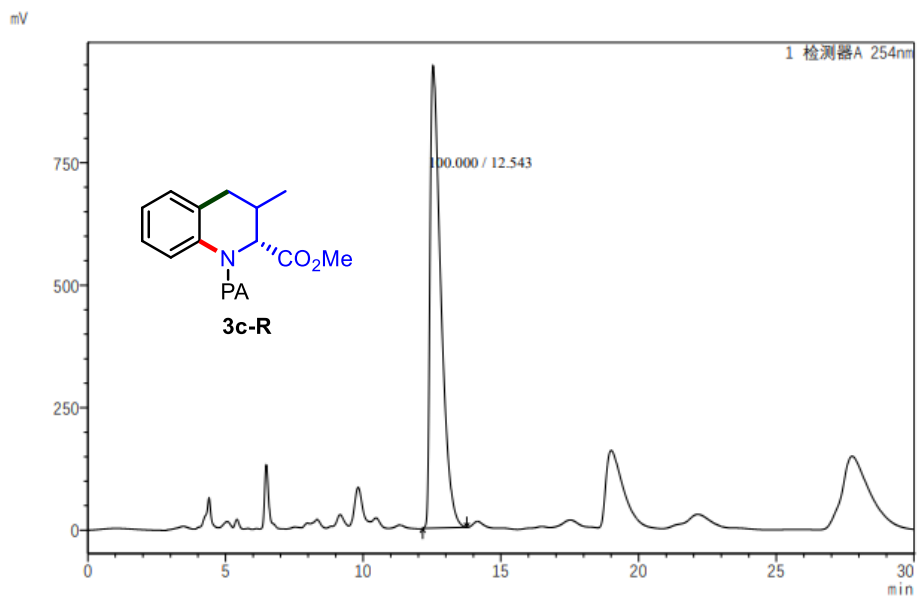

D:\zymzdx\3\3-D.lcd

3c+3c-R (1:1), IB-N5, Hex/PrOH = 80/20, rate = 1 mL/min, 254 nm

2022/12/12 12:55:57 1 / 1

==== Shimadzu LabSolutions 分析报告 ====

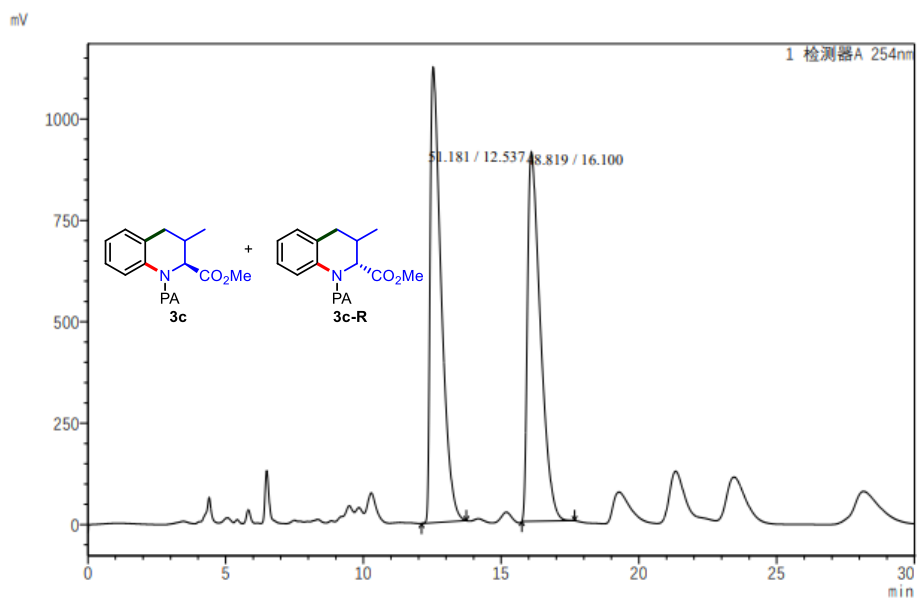

D:\zymzdx\3\3-DL.lcd

1j-S, AD-3 rate 0.5ml/min Hex:iPr 90:10, 254 nm

2022/11/12 16:38:32 1 / 1

2022/12/29 09:45:35 1 / 1

SHIMADZU LabSolutions 分析报告

<样品信息>

样品名 : 1-S  
样品ID :  
数据文件名 : 1-S1.lcd  
方法文件名 : 消旋产物.lcm  
批处理文件名 :  
样品瓶号 : 1-1  
进样体积 : 20 uL  
分析日期 : 2022/12/28 20:14:58  
处理日期 : 2022/12/29 09:36:01  
样品类型 : 未知  
分析者 : System Administrator  
处理者 : System Administrator

<色谱图>

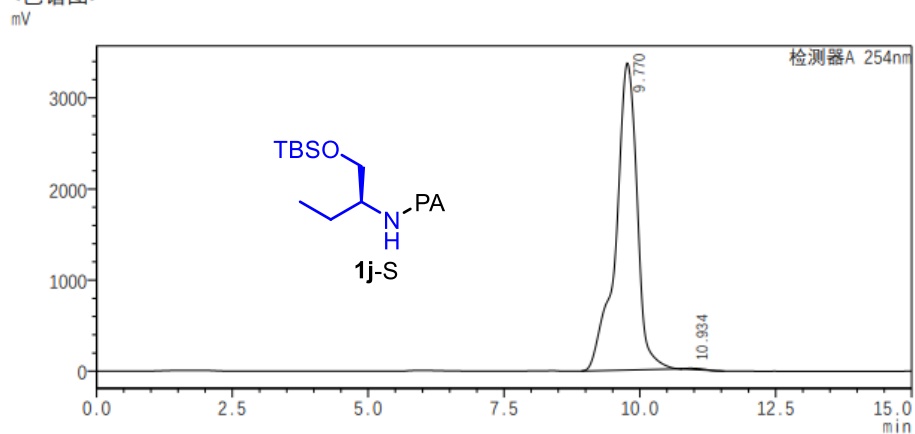

<峰表>

检测器A 254nm

| 峰号 | 保留时间   | 面积       | 高度      | 浓度     | 浓度单位 | 标记 | 化合物名 |
|----|--------|----------|---------|--------|------|----|------|
| 1  | 9.770  | 92430011 | 3368278 | 99.720 |      | M  |      |
| 2  | 10.934 | 259430   | 11969   | 0.280  |      | M  |      |
| 总计 |        | 92689441 | 3380247 |        |      |    |      |

D:\zymzdx\111-S1.lcd



1j, AD-3 rate 0.5ml/min Hex:iPr 90:10, 254 nm

2022/12/29 09:46:45 1 / 1

SHIMADZU LabSolutions 分析报告

<样品信息>

样品名 : 1-SR  
样品ID :  
数据文件名 : 1-SR1.lcd  
方法文件名 : 消旋产物.lcm  
批处理文件名 :  
样品瓶号 : 1-1  
进样体积 : 20 uL  
分析日期 : 2022/12/28 19:58:49  
处理日期 : 2022/12/28 20:16:19  
样品类型 : 未知  
分析者 : System Administrator  
处理者 : System Administrator

<色谱图>

mV

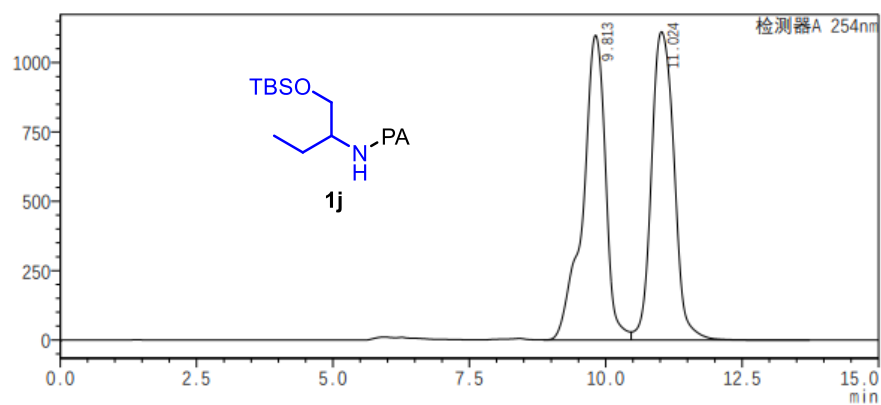

<峰表>

检测器A 254nm

| 峰号 | 保留时间   | 面积       | 高度      | 浓度     | 浓度单位 | 标记 | 化合物名 |
|----|--------|----------|---------|--------|------|----|------|
| 1  | 9.813  | 31958331 | 1099012 | 49.786 |      |    |      |
| 2  | 11.024 | 32232607 | 1111730 | 50.214 |      | V  |      |
| 总计 |        | 64190938 | 2210742 |        |      |    |      |

D:\zymzdx\1\1-SR1.lcd

3j IB-N5, Hex/PrOH = 80/20, rate = 1 mL/min, 254 nm

2022/11/12 16:38:32 1 / 1

==== Shimadzu LabSolutions 分析报告 ====

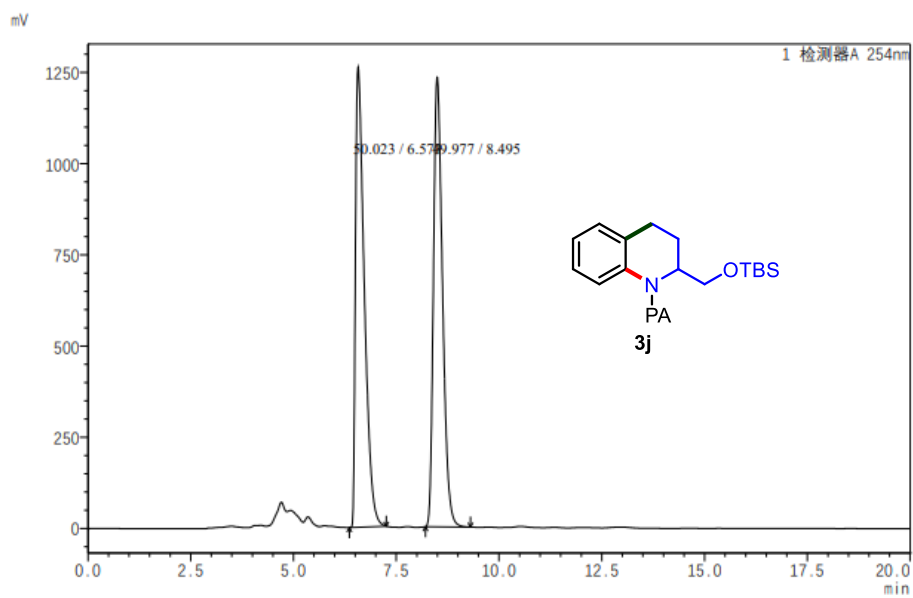

D:\HLL\不饱和亚胺全氢化\中央民族大学\test 80: 201B-6.lcd

3j-S IB-N5, Hex/iPrOH = 80/20, rate = 1 mL/min, 254 nm

2022/11/12 17:24:19 1 / 1

==== Shimadzu LabSolutions 分析报告 ====

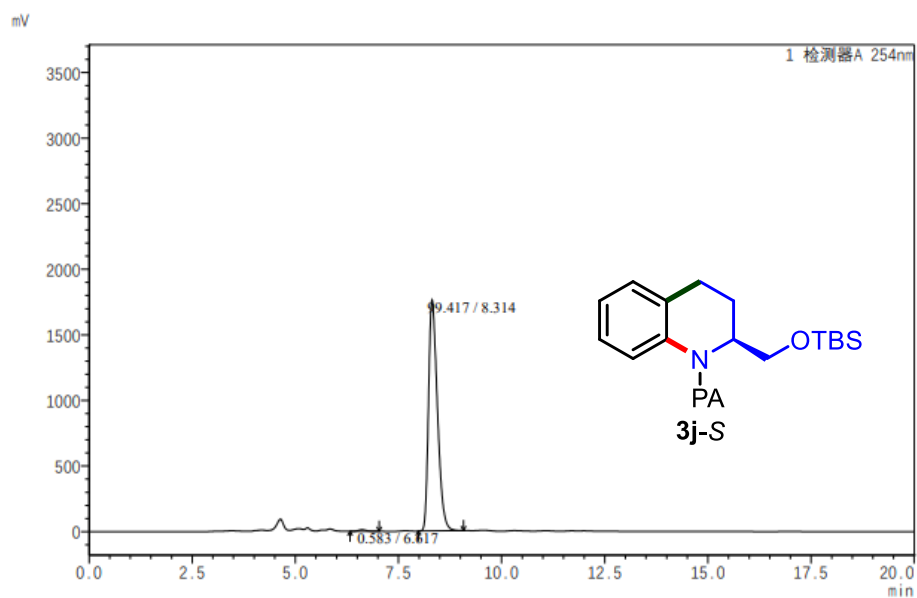

D:\HPL\不饱和亚胺全氢化\中央民族大学\test 80: 20IB-N5(手性样品)1.lcd
